# Supplementary material for: Caesarean section in uninsured women in the USA: systematic review and meta-analysis
Source: PubMed Central journal article supplement — BMJ Open. 2019 Mar 3;9(3):e025356. doi: 10.1136/bmjopen-2018-025356 (PMC6443081; doi:10.1136/bmjopen-2018-025356), 2019-03-03
Supplement: bmjopen-2018-025356.draft_revisions.pdf [file bmjopen-2018-025356.draft_revisions.pdf]

# BMJ Open

BMJ Open is committed to open peer review. As part of this commitment we make the peer review history of every article we publish publicly available.

When an article is published we post the peer reviewers' comments and the authors' responses online. We also post the versions of the paper that were used during peer review. These are the versions that the peer review comments apply to.

The versions of the paper that follow are the versions that were submitted during the peer review process. They are not the versions of record or the final published versions. They should not be cited or distributed as the published version of this manuscript.

BMJ Open is an open access journal and the full, final, typeset and author-corrected version of record of the manuscript is available on our site with no access controls, subscription charges or pay-per-view fees (<http://bmjopen.bmj.com>).

If you have any questions on BMJ Open's open peer review process please email [info.bmjopen@bmj.com](mailto:info.bmjopen@bmj.com)

# BMJ Open

## Caesarean Section in Uninsured Women in the United States: Systematic Review and Meta-analysis

|                               |                                                                                                                                                                                                                                                                                                                                                                   |
|-------------------------------|-------------------------------------------------------------------------------------------------------------------------------------------------------------------------------------------------------------------------------------------------------------------------------------------------------------------------------------------------------------------|
| Journal:                      | <i>BMJ Open</i>                                                                                                                                                                                                                                                                                                                                                   |
| Manuscript ID                 | bmjopen-2018-025356                                                                                                                                                                                                                                                                                                                                               |
| Article Type:                 | Research                                                                                                                                                                                                                                                                                                                                                          |
| Date Submitted by the Author: | 11-Jul-2018                                                                                                                                                                                                                                                                                                                                                       |
| Complete List of Authors:     | Hoxha, Ilir; Kolegjin Heimerer, Health Management; Geisel School of Medicine at Dartmouth, Department of Community & Family Medicine Braha, Medina; International Business College Mitrovica, Syrogiannouli, Lamprini; Universität Bern, Berner Institut für Hausarztmedizin (BIHAM)<br>Goodman, David C; Dartmouth College Geisel School of Medicine Jüni, Peter |
| Keywords:                     | caesarean section, health insurance, uninsured, self-pay, medical practice variation, underuse                                                                                                                                                                                                                                                                    |
|                               |                                                                                                                                                                                                                                                                                                                                                                   |

SCHOLARONE™  
Manuscripts

View Only

## Caesarean Section in Uninsured Women in the United States: Systematic Review and Meta-analysis

*Ilir HOXHA MD MSc PhD, Clinical Assistant Professor;<sup>abg</sup> Medina BRAHA PhD Candidate, Lecturer;<sup>c</sup> Lamprini SYROGIANNOULI MSc, Research Associate;<sup>d</sup> David C. GOODMAN MD MSc, Professor of Pediatrics;<sup>ae</sup> Peter JÜNI MD, Professor of Medicine and Director.<sup>f</sup>*

<sup>a</sup> Institute of Social and Preventive Medicine, University of Bern, 3012 Bern, Switzerland

<sup>b</sup> Department of Community & Family Medicine, Geisel School of Medicine at Dartmouth Hanover, NH 03755, United States

<sup>c</sup> International Business College Mitrovica, 40000 Mitrovica, Kosovo

<sup>d</sup> Institute of Primary Health Care, University of Bern, 3012 Bern, Switzerland

<sup>e</sup> The Dartmouth Institute for Health Policy and Clinical Practice, Lebanon, NH 03766, United States

<sup>f</sup> Applied Health Research Centre (AHRC), Li Ka Shing Knowledge Institute of St. Michael's Hospital, Department of Medicine, and Institute of Health Policy, Management and Evaluation, University of Toronto, M5B 1M8 Toronto, ON, Canada

<sup>g</sup> Heimerer College, 1000 Prishtina, Kosovo

*Correspondence to: Ilir Hoxha; [ilir.s.hoxha@dartmouth.edu](mailto:ilir.s.hoxha@dartmouth.edu); +383 45 588 683, Rruga e Shkupit Veternik PN, 10000 Prishtina, Kosovo*

### Keywords

caesarean section, health insurance, uninsured, self-pay, access to care, medical practice variation, health services, financial incentives, underuse, underserved

### Word count

Manuscript: 2894 words excluding title page, abstract, references, figures and tables.

## Abstract

**Objective:** The aim of this study is to assess the odds of caesarean section for uninsured women in the United States and understand the underlying mechanisms as well as consequences of lower use.

**Study design:** Systematic review and meta-analysis.

**Data sources:** MEDLINE, Embase, The Cochrane Library and CINAHL from the first year of records through April 2018.

**Eligibility criteria:** We included studies that reported data to allow the calculation of odds ratios of caesarean section of uninsured as compared to insured women.

**Outcomes:** The pre-specified primary outcome was the adjusted odds ratio of deliveries by caesarean section of uninured women as compared with privately or publicly insured women. The pre-specified secondary outcome was the crude odds ratio of deliveries by caesarean section of uninsured women as compared with insured women.

**Results:** Twelve articles describing sixteen separate studies involving more than 8.8 million women were included in this study. We found: 0.70 times lower odds of caesarean section in uninsured as compared to privately insured women (95%CI 0.63 to 0.78), with no relevant heterogeneity between studies ( $\tau^2=0.01$ ); and, 0.92 times lower odds for caesarean section in uninsured as compared to publicly insured women (95%CI 0.80, 1.07), with no relevant heterogeneity between studies ( $\tau^2=0.02$ ). The lower odds were noticed in subgroup analyses as well as in crude analysis. We found 0.70 times lower odds in uninsured as compared to privately and publicly insured women (95%CI 0.69, 0.72).

**Conclusions:** Caesarean sections are less likely to be performed in uninsured women as compared with insured women. In many regions the rates for uninsured women are close or below the benchmarks for appropriate caesarean section rates, therefore efforts to assess the

1  
2  
3  
4  
5  
6  
7  
8  
9  
10  
11  
12  
13  
14  
15  
16  
17  
18  
19  
20  
21  
22  
23  
24  
25  
26  
27  
28  
29  
30  
31  
32  
33  
34  
35  
36  
37  
38  
39  
40  
41  
42  
43  
44  
45  
46  
47  
48  
49  
50  
51  
52  
53  
54  
55  
56  
57  
58  
59  
60

delivery outcomes as well as policy options that could improve insurance coverage for women giving birth are important.

For peer review only

## Strengths and limitations of this study

- ✓ Extensive literature search, screening and data extraction performed in duplicate, review and analysis of study characteristics as well as thorough quality assessment of included studies.
- ✓ All studies are from one country, i.e. the United States, and this limits the effect of contextual factors.
- ✓ A major limitation of our study is the variation across studies, in terms of the study populations characteristics, type of data used, types of caesarean section analyzed and adjusting variables used in statistical analyses.
- ✓ Despite similar features, the uninsured are a diverse group of United States citizens.
- ✓ While a population level caesarean section rate of less than 15 or 19 percent suggests underuse, we cannot determine the mix of under, over, and appropriate use in a specific population.

## Introduction

Introduction of clinical procedures in medical practice have saved and improved the lives of many people worldwide. But with time, these clinical procedures become subject to overuse or underuse; i.e. some people get them without really needing them while others do not get them although in need of them.<sup>1</sup> As a result, overuse of procedures may result in unnecessary harm due to the side effects of the procedures or, in case of underuse, not receiving the care they need.<sup>1-3</sup> These adverse effects occur due to differing health systems and other contextual factors.<sup>3,4</sup> These factors include financial and non-financial barriers in accessing healthcare even in the most advanced economies in the world, such as the United States (US). Consequently, specific segments of the population may be underserved as healthcare systems are unable to address structural problems that leave patients without the care they need.<sup>1</sup>

Globally, Caesarean section (CS) is an example of overuse and underuse of clinical procedures. Once introduced into clinical practice, it greatly improved maternal and newborn outcomes.<sup>5</sup> Presently, many countries have long exceeded the 15 or 19 percent benchmarks for CS out of total deliveries, argued to be the ideal rate of CS in terms of improving the health of women and newborns.<sup>6-8</sup> CS rates average as high as 40.5 percent among countries in Latin America and the Caribbean region,<sup>9</sup> 32.3 percent in Northern America<sup>9</sup> (32.2 percent in US),<sup>10</sup> while on the other extreme, it is as low as 7.3 percent in Africa<sup>9</sup> and known to range even lower in specific countries: 1 percent in Nepal and Cambodia to 0.6 percent in Ethiopia and Niger.<sup>11</sup> Variations are also observed within countries,<sup>5, 11</sup> for instance, in the US<sup>5</sup> a recent study reported a range between 4 to 65 percent across health markets.<sup>12</sup>

Insurance coverage is one health system factors known to influence the use of medical procedures,<sup>13, 14</sup> including CS.<sup>15-18</sup> While private insurance, for example, seems to increase the odds of having a CS delivery,<sup>15</sup> the lack of insurance appears to decrease it.<sup>18-20</sup> Millions of people worldwide, as well as in the US, are not covered by any insurance scheme and are

1  
2  
3 exposed to the hazard of being underserved with clinical procedures,<sup>21-25</sup> including perinatal  
4 services.<sup>26</sup> The US has a mixed health insurance system dominated by private insurance.<sup>22</sup>  
5  
6 The Federal Medicare program, covers people over 64 years old and/or disabled, which  
7  
8 accounts for about 16.7 percent of the population.<sup>22</sup> State Medicaid programs cover children  
9  
10 and parents from low income families as well as partially caring for Medicare beneficiaries  
11  
12 with low incomes and, in total, accounts for about 19.4 percent of the US population.<sup>27</sup> Over  
13  
14 half of US population is covered with voluntary employer based private insurance.<sup>27</sup> The  
15  
16 remaining population is uninsured and can range from 2.5 (Massachusetts) to 16.6 (Texas)  
17  
18 percent according to 2016 estimates.<sup>27</sup> For decades, in the US, there has been an ongoing  
19  
20 debate for and against universal health coverage and related topics with limited but  
21  
22 substantial progress towards more coverage through the Affordable Care Act (ACA).<sup>21 28-35</sup>  
23  
24 Nonetheless, millions of Americans remain uninsured for various reasons and are not able to  
25  
26 access the healthcare they need.<sup>21 29 36</sup> The aim of this study is to assess the odds of CS for  
27  
28 uninsured women in the US and understand the underlying mechanisms as well as  
29  
30 consequences of lower use in the US context.<sup>37</sup>  
31  
32  
33  
34  
35

## 36 **Materials and methods**

### 37 *Search strategy and data sources*

38  
39 Search words referring to CS, such as 'caesarean section', 'caesarean delivery', 'caesarean',  
40  
41 were combined with words referring to factors contributing to variation and increase of CS  
42  
43 rates, such as 'insurance', 'social class', 'socioeconomic', and words referring to study  
44  
45 design, such as 'geographic variation', 'medical practice variation' (Appendix 1). No  
46  
47 publication date or language restrictions were applied. We searched MEDLINE, Embase, the  
48  
49 Cochrane Library and CINAHL from the beginning of records to the end of April 2018, when  
50  
51 we last updated our search. A manual search was applied on the reference lists of included  
52  
53 studies and previous systematic reviews.  
54  
55  
56  
57  
58  
59  
60



### ***Study selection and outcomes***

To be included in the analysis, studies had to report odds ratio (OR) of CS comparing uninsured against privately and/or publicly insured women. Adjusted OR of deliveries by CS of uninsured women in comparison to insured women was the pre-specified primary outcome. Crude OR of deliveries by CS of uninsured women in comparison to insured women was the pre-specified secondary outcome.

### ***Data extraction***

Papers screening and independent data extraction was done by two researchers (IH and MB). Differences were resolved based on consensus. We extracted data on study population, study design, data sources, setting, type of CS analyzed, statistical analysis, and (primary and secondary) outcome measures.

### ***Quality assessment***

We used Quality In Prognostic Studies (QUIPS) to assess the risk of bias across six study domains.<sup>38</sup> Each study was evaluated independently by two researchers (IH and MB) and any differences among evaluators were discussed and resolved. A single rating was assigned for all studies. As specified in the QUIPS tool, a “high”, “moderate”, or “low” rating was applied for individual domains and overall rating of a study.<sup>38</sup> If a study was rated with a low risk of bias across all the six domains, it would receive an overall rating of low risk of bias.<sup>15</sup> If one or more domains of a study were rated with a moderate risk of bias, it would receive an overall moderate risk of bias.<sup>15</sup> If one or more domains of a study were rated with a high risk of bias, it would receive an overall high risk of bias.<sup>15</sup>

### ***Main analysis***

Standard inverse-variance random effects meta-analysis was used to combine the overall ORs. An OR lower than one implies a lower frequency of CS in uninsured than in insured women. We calculated  $\tau^2$  to measure heterogeneity between studies.<sup>39</sup> Pre-specified cutoffs of

1  
2  
3  $\tau^2$  of 0.04, 0.16 and 0.36 were used to represent low, moderate, and high heterogeneity  
4 between studies.<sup>40</sup> Subgroup analysis by study design, period of data collection, state, type of  
5 CS analyzed, parity, inclusion of women with previous CS, pregnancy risk of included  
6 women and level of (QUIPS) risk of bias was performed to examine between-study  
7 heterogeneity and chi-square test was used to calculate p-values for interaction among  
8 subgroups. Test for linear trend was performed in case of more than two ordered strata. All p-  
9 values were two-sided. STATA, release 13, was used for analyses (Stata-Corp, College  
10 Station, Texas).

### 21 *Additional analysis*

22 We calculated CS rates among different insurance subgroups for the studies included in the  
23 analysis.

### 27 *Patient involvement*

28 No patients were involved in this study. We used data from published papers only.

## 33 **Results**

34 We identified a total of 1837 records: 1123 from Medline; 556 from Embase; 39 from the  
35 Cochrane Library, 119 from CINAHL and 28 from manual search (Figure 1). We removed  
36 240 duplicates. 1597 records were screened for eligibility. We performed full text  
37 examination on 177 records. We excluded 139 that did not report insurance status of women  
38 and 26 that were otherwise irrelevant. Finally, 12 records describing 16 separate studies<sup>18-20</sup>  
39 <sup>41-49</sup> including more than 8.8 million women were included in review and meta-analysis.

40 Characteristics of studies are presented in Table 1 and Appendices 2, 3, 4 and 5. All studies  
41 were from the US. Thirteen studies were cross-sectional and three were retrospective cohort  
42 studies. Population size of studies ranged from 9,017 to 6,717,486 cases. Studies used data  
43 from years 1986 to 2011 and most studies used hospital records data (Appendix 2). Case  
44  
45  
46  
47  
48  
49  
50  
51  
52  
53  
54  
55  
56  
57  
58  
59  
60

1  
2  
3 exclusion criteria varied considerably (Appendix 3) as well as variables studies used for  
4 statistical adjustment (Appendix 4). Appendix 5 reports evaluation of studies using QUIPS  
5 risk of bias tool. Four studies were classified with low risk of bias, two studies with moderate  
6 risk, and ten studies with high risk of bias (Appendix 5).

7  
8  
9  
10  
11  
12 Figure 2 presents meta-analyses for primary outcome measure, i.e. adjusted ORs of CS in  
13 uninsured women as compared to privately or publicly insured. Since there was a positive  
14 interaction between uninsured vs privately insured group and uninsured vs publicly insured  
15 group ( $p=0.016$ ), we performed meta-analyses for each group separately. In the meta-analysis  
16 comparing uninsured with privately insured women, including seven studies in 556,454  
17 women, we found that the odds of CS were 0.70 times lower in uninsured as compared to  
18 privately insured women (95%CI 0.63 to 0.78), with no relevant heterogeneity between  
19 studies ( $\tau^2=0.01$ ). In meta-analysis comparing uninsured with publicly insured women,  
20 including four studies in 510,010 women, we found that the odds of CS were 0.92 times  
21 lower in uninsured as compared to publicly insured women (95%CI 0.80, 1.07), with no  
22 relevant heterogeneity between studies ( $\tau^2=0.02$ ). An additional study in 6,717,486 women,  
23 which did not distinguish between privately and publicly insured women,<sup>49</sup> reported that the  
24 odds of CS were 0.70 times lower in uninsured as compared to insured women (95%CI 0.69,  
25 0.72).

26  
27  
28  
29  
30  
31  
32  
33  
34  
35  
36  
37  
38  
39  
40  
41  
42  
43 Figure 3 presents results of subgroup analyses of adjusted odds ratios in uninsured vs  
44 privately insured women (upper panel) and in uninsured vs publicly insured women (lower  
45 panel). In the analysis of uninsured vs privately insured women, estimates varied for  
46 subgroups state ( $p$  for interaction $<0.001$ ), type of CS ( $p$  for interaction $<0.001$ ), parity ( $p$  for  
47 interaction=0.07), and pregnancy risk ( $p$  for interaction $<0.001$ ). There was no positive trend  
48 in the period of data collection subgroup. In the lower panel, which presents subgroup  
49 analyses of adjusted odds ratios in uninsured vs publicly insured women, estimates varied for  
50  
51  
52  
53  
54  
55  
56  
57  
58  
59  
60

1  
2  
3 subgroups period of data collection (p for interaction=0.03), state (p for interaction=0.004),  
4 type of CS (p for interaction=0.03), parity (p for interaction=0.03) and QUIPS risk of bias (p  
5 for interaction=0.03).  
6  
7

8  
9  
10 In Figure 4 we present meta-analyses for crude ORs of CS in uninsured as compared to  
11 privately or publicly insured women as secondary outcome. In the meta-analysis comparing  
12 uninsured with privately insured women, including eleven studies in 2,010,483 women, we  
13 found that the odds of CS were 0.71 times lower in uninsured as compared to privately  
14 insured women (95%CI 0.66 to 0.76), with no relevant heterogeneity between studies  
15 ( $\tau^2=0.018$ ). In the meta-analysis comparing uninsured with publicly insured women,  
16 including eleven studies in 2,010,483 women, we found that the odds of CS were 0.93 times  
17 lower in uninsured as compared to publicly insured women (95%CI 0.85, 1.01), with no  
18 relevant heterogeneity between studies ( $\tau^2=0.017$ ).  
19  
20  
21  
22  
23  
24  
25  
26  
27  
28

29 Appendix 6 presents rates of CS among groups with different insurance status for individual  
30 studies. Two studies found CS rates for uninsured women below the 19 percent benchmark,  
31 another five studies found CS rates below the 15 percent benchmark. The rates of other  
32 studies range from 19.3 percent to 23.0 percent, close to 19 percent benchmark.  
33  
34  
35  
36  
37  
38

## 39 **Discussion**

40  
41 Our systematic review and meta-analyses estimated that the overall odds of receiving a  
42 caesarean section are on average 0.70 times lower for uninsured women as compared with  
43 privately insured women, 0.92 times lower for uninsured women as compared with publicly  
44 insured women and 0.70 times lower for uninsured women as compared to privately and  
45 publicly insured women. The lower odds were noticed across all subgroups of studies in  
46 subgroup analyses as well as in crude analyses.  
47  
48  
49  
50  
51  
52  
53

## 54 **Context**

1  
2  
3 To our knowledge, this is the first meta-analysis that examines CS rates of uninsured women  
4 compared to insured women. Two recently published meta-analyses by our group reported  
5 the association of CS with for profit status of hospitals and type of insurance.<sup>15 50</sup>  
6  
7

8  
9 Investigating the association of for-profit vs non-profit status of hospital with the odds of CS,  
10 we found that the odds of CS were 1.41 higher in for-profit hospitals as compared with non-  
11 profit hospitals (95% CI 1.24 to 1.60).<sup>50</sup> The findings were consistent in subgroup analyses.<sup>50</sup>  
12  
13

14  
15 Investigating the association of CS with private insurance, we found that the odds of CS were  
16 1.13 times higher for privately insured women compared with women covered with public  
17 insurance.<sup>15</sup> Again, the increased risk was observed across all subgroups.<sup>15</sup>  
18  
19  
20  
21

### 22 ***Strengths and limitations***

23  
24 The major strengths of our meta-analysis include an extensive literature search, screening and  
25 data extraction performed in duplicate, review and analysis of study characteristics as well as  
26 thorough quality assessment of included studies. In addition, all studies are from one country,  
27 i.e. the US, and this limits the effect of contextual factors. A major limitation is the variation  
28 across studies, in terms of the study populations characteristics (i.e. parity, inclusion of  
29 women with previous CS, risk for CS), type of data used, types of CS analyzed and adjusting  
30 variables used in statistical analyses. It should also be taken into consideration, that despite  
31 similar features, the uninsured are a diverse group of US citizens.<sup>24 25</sup> Finally, while a  
32 population level CS rate of less than 15 or 19 percent suggests underuse, we cannot determine  
33 the mix of under, over, and appropriate use in a specific population.  
34  
35  
36  
37  
38  
39  
40  
41  
42  
43  
44  
45  
46

### 47 ***Mechanism***

48  
49 There are several possible explanations why uninsured women have lower odds of CS when  
50 compared to insured women. One likely factor is that financial incentives are stronger with  
51 private insurance than in the publicly insured or uninsured.<sup>15 16</sup> These incentives result from  
52 higher payment for CS by private insurers through reimbursement arrangements that  
53  
54  
55  
56  
57  
58  
59  
60

1  
2  
3 encourage more expensive procedures as means to increase profits, as well as providers'  
4 (hospitals and individual physicians) responses to these incentives.<sup>15 50 51</sup> The responses to  
5 incentives by hospitals exist in the form of patient scheduling policies that direct privately  
6 insured patients to profit inclined physicians.<sup>18 50</sup> It is also a known association that  
7 physicians who have a higher share of privately insured patients will tend to overuse CS.<sup>19 20</sup>  
8  
9  
10  
11  
12  
13  
14  
15  
16  
17  
18  
19  
20  
21  
22  
23  
24  
25  
26  
27  
28  
29  
30  
31  
32  
33  
34  
35  
36  
37  
38  
39  
40  
41  
42  
43  
44  
45  
46  
47  
48  
49  
50  
51  
52  
53  
54  
55  
56  
57  
58  
59  
60

<sup>50</sup> They do so as they perceive patients to have a higher social class, i.e. able to pay higher fees, or fear malpractice liability.<sup>16 41 50 52</sup>

Additional reasons are likely reflected in the comparison between uninsured and publicly insured women. A first set of reasons are related to deliberate or forced decisions of uninsured women to keep out-of-pocket payments low.<sup>16</sup> The uninsured patients are more likely to seek less expensive care when they face the need for healthcare services.<sup>16</sup> In the case of giving birth, this would lead to a greater preference for vaginal delivery. A second set of reasons may be discrimination of providers towards uninsured women. Providers have a preference for profitable, i.e. privately insured patients, a preference commonly referred to as “cream skimming”.<sup>19 20 50 53</sup>

### ***Implications for uninsured women***

Most studies included in our meta-analysis, including the most recent studies from California<sup>47</sup> and Florida,<sup>48</sup> show that rates for CS among uninsured women are below or close to the 15 and 19 percent benchmarks previously reported.<sup>6-8</sup> Even in instances where the average state rates are slightly above the 19 percent benchmark, some hospitals service areas are likely to have CS rates lower than 19 percent or even 15 percent for uninsured women because of the well-established within state variation in CS rates.<sup>5 52</sup> Uninsured women in these areas are highly likely to be underserved with caesarean section during delivery. Uninsured patients generally have higher unmet needs than insured patients due to access barriers.<sup>21 22 24 26 54-58</sup> Such barriers encourage inappropriate health seeking behaviors among

1  
2  
3 uninsured.<sup>21-23 30 56 59-61</sup> Consequently, uninsured populations face higher health risks and  
4  
5 have worse healthcare outcomes.<sup>21-24 30 54-57 59 60 62 63</sup>  
6

7  
8 The uninsured also face financial burdens which result from out-of-pocket payments that are  
9  
10 more severe/extensive than co-payments or premiums that are paid by people that are  
11  
12 publicly or privately insured. The uninsured are known to pay higher prices for services as  
13  
14 compared to other payers for the same care,<sup>25 64</sup> spend a high portion of income to cover  
15  
16 medical expenses<sup>22</sup> (although they spend less for their health compared to patients who have  
17  
18 insurance),<sup>24</sup> are frequently charged for full price for healthcare services,<sup>22 64</sup> often do not  
19  
20 benefit from discounts from providers,<sup>22 25</sup> and face severe financial difficulties.<sup>21 22</sup>  
21

22  
23 Uninsured manage to pay only part of the costs for their care.<sup>24</sup> The remaining costs are  
24  
25 uncompensated costs<sup>21 24 65 66</sup> and most of such costs are covered by the local, state or federal  
26  
27 government,<sup>24 65</sup> eventually resulting in tax increases.<sup>24</sup>  
28

### 29 ***Implications for research and policy making***

30  
31  
32 Future studies should examine the association of a lack of insurance in pregnant women  
33  
34 across health care markets with varying CS rates and assess if delivery outcomes were  
35  
36 correspondingly worse, in the effort to investigate the presence of underuse of CS.  
37

38  
39 In parallel, policy options that could lead to improvements of insurance coverage for  
40  
41 delivering women should be assessed in terms of their ability to address healthcare outcomes  
42  
43 while keeping overall costs at minimum. In the past, states have adopted different strategies  
44  
45 for covering uninsured people.<sup>22 23 37 67</sup> While there are many known benefits to insurance  
46  
47 coverage,<sup>21 22 30-33 35 57 60 66 68-70</sup> other important policy aspects should be considered. At a time  
48  
49 of rising healthcare costs<sup>22 33 70 71</sup> regulation of financial incentives is crucial. A revision of  
50  
51 payment policies should be pursued<sup>15 16 22 50</sup> to align financial incentives with proper health  
52  
53 outcomes.<sup>15 22 50</sup> Reimbursement policies that would pay the same amount for CS and vaginal  
54  
55 delivery is one option.<sup>50 72</sup>  
56  
57  
58  
59  
60

## **Conclusion**

Caesarean sections are less likely to be performed in uninsured women as compared with insured women. The lower odds are consistent in all subgroups and in crude analyses. In many regions the rates for uninsured women are close or below the benchmarks for appropriate CS rates, therefore efforts to assess the delivery outcomes as well as policy options that could improve insurance coverage for women giving birth are important.

## **Acknowledgments**

### **Exclusive Licence**

*The Corresponding Author has the right to grant on behalf of all authors and does grant on behalf of all authors, an exclusive licence (or non-exclusive for government employees) on a worldwide basis to the BMJ Publishing Group Ltd and its Licensees to permit this article (if accepted) to be published in BMJ Open and any other BMJ PGL products to exploit all subsidiary rights, as set out in our licence <http://journals.bmj.com/site/authors/editorial-policies.xhtml#copyright> and the Corresponding Author accepts and understands that any supply made under these terms is made by BMJ PGL to the Corresponding Author. All articles published in BMJ Open will be made available on an Open Access basis (with authors being asked to pay an open access fee - see <http://bmjopen.bmj.com/site/about/resources.xhtml>) Access shall be governed by a Creative Commons licence – details as to which Creative Commons licence will apply to the article are set out in our licence referred to above.*

### **Contributorship Statement**

IH, DG, PJ conceived and designed the study. IH, MB performed the data extraction and preparation. IH, LS analyzed the data. IH, MB, LS drafted the paper, which was critically reviewed and approved by all authors.



1  
2  
3 We thank Doris Kopp and Beatrice Minder for their valuable help during development of the  
4 search strategy, Arjana Shala for her help with literature search and Hossein Meyer-Troeltsch  
5 and Rand Engel for their support with editing.  
6  
7  
8

9  
10 ***Competing interests statement***

11 *All authors have completed the ICMJE uniform disclosure form at*  
12 *www.icmje.org/coi\_disclosure.pdf and declare: no support from any organisation for the*  
13 *submitted work; no financial relationships with any organisations that might have an interest*  
14 *in the submitted work in the previous three years; no other relationships or activities that*  
15 *could appear to have influenced the submitted work.*  
16  
17  
18  
19  
20  
21  
22  
23

24 ***Funding statement***

25 *No funding was received to perform this study. All authors, had full access to all of the data*  
26 *(including statistical reports and tables) in the study and take responsibility for the integrity*  
27 *of the data and the accuracy of the data analysis.*  
28  
29  
30  
31  
32  
33

34 ***Data sharing statement***

35 *No additional unpublished data are available from the study.*  
36  
37  
38  
39  
40  
41  
42  
43  
44  
45  
46  
47  
48  
49  
50  
51  
52  
53  
54  
55  
56  
57  
58  
59  
60

## References

1. Saini V, Brownlee S, Elshaug AG, et al. Addressing overuse and underuse around the world. *The Lancet* 2017;390(10090):105-07. doi: 10.1016/s0140-6736(16)32573-9
2. Berwick DM. Avoiding overuse—the next quality frontier. *The Lancet* 2017;390(10090):102-04. doi: 10.1016/s0140-6736(16)32570-3
3. Wennberg JE. Tracking medicine : a researcher's quest to understand health care. First Edition ed. Oxford: Oxford University Press 2011.
4. Poma PA. Effects of obstetrician characteristics on cesarean delivery rates. A community hospital experience. *Am J Obstet Gynecol* 1999;180(6 Pt 1):1364-72. [published Online First: 1999/06/16]
5. Hoxha I, Busato A, Luta X. Medical Practice Variations in Reproductive, Obstetric, and Gynecological Care. In: Johnson A, Stukel TA, eds. Medical Practice Variations. Boston, MA: Springer US 2016:141-60.
6. Molina G, Weiser TG, Lipsitz SR, et al. Relationship Between Cesarean Delivery Rate and Maternal and Neonatal Mortality. *JAMA* 2015;314(21):2263-70. doi: 10.1001/jama.2015.15553
7. Betran AP, Torloni MR, Zhang JJ, et al. WHO Statement on Caesarean Section Rates. *BJOG* 2016;123(5):667-70. doi: 10.1111/1471-0528.13526
8. Appropriate technology for birth. *Lancet* 1985;2(8452):436-7.
9. Betran AP, Ye J, Moller AB, et al. The Increasing Trend in Caesarean Section Rates: Global, Regional and National Estimates: 1990-2014. *PLoS One* 2016;11(2):e0148343. doi: 10.1371/journal.pone.0148343
10. OECD. Health at a Glance 2017: OECD Indicators: OECD Publishing, 2017.

- 1  
2  
3 11. Betran AP, Merialdi M, Lauer JA, et al. Rates of caesarean section: analysis of global,  
4 regional and national estimates. *Paediatr Perinat Epidemiol* 2007;21(2):98-113. doi:  
5 10.1111/j.1365-3016.2007.00786.x  
6  
7  
8  
9 12. Little SE, Orav EJ, Robinson JN, et al. The relationship between variations in cesarean  
10 delivery and regional health care use in the United States. *Am J Obstet Gynecol*  
11 2016;214(6):735.e1-8. doi: 10.1016/j.ajog.2015.12.023 [published Online First:  
12 2016/01/02]  
13  
14  
15  
16  
17 13. Haas S, Acker D, Donahue C, et al. Variation in hysterectomy rates across small  
18 geographic areas of Massachusetts. *Am J Obstet Gynecol* 1993;169(1):150-4.  
19 [published Online First: 1993/07/01]  
20  
21  
22  
23 14. Jacoby VL, Vittinghoff E, Nakagawa S, et al. Factors associated with undergoing bilateral  
24 salpingo-oophorectomy at the time of hysterectomy for benign conditions. *Obstet*  
25 *Gynecol* 2009;113(6):1259-67. doi: 10.1097/AOG.0b013e3181a66c42  
26  
27  
28  
29  
30 15. Hoxha I, Syrogiannouli L, Braha M, et al. Caesarean sections and private insurance:  
31 systematic review and meta-analysis. *BMJ Open* 2017;7(8):e016600. doi:  
32 10.1136/bmjopen-2017-016600  
33  
34  
35  
36 16. Keeler EB, Brodie M. Economic incentives in the choice between vaginal delivery and  
37 cesarean section. *Milbank Q* 1993;71(3):365-404. [published Online First:  
38 1993/01/01]  
39  
40  
41  
42  
43 17. Haas JS, Udvarhelyi S, Epstein AM. The effect of health coverage for uninsured pregnant  
44 women on maternal health and the use of cesarean section [see comments]. *Jama*  
45 1993; 270(1). [http://onlinelibrary.wiley.com/o/cochrane/clcentral/articles/860/CN-  
46 00597860/frame.html](http://onlinelibrary.wiley.com/o/cochrane/clcentral/articles/860/CN-00597860/frame.html).  
47  
48  
49  
50  
51 18. Stafford RS. Cesarean section use and source of payment: An analysis of California  
52 hospital discharge abstracts. *American Journal of Public Health* 1990;80(3):313-15.  
53  
54  
55  
56  
57  
58  
59  
60

- 1  
2  
3 19. Burns LR, Geller SE, Wholey DR. The effect of physician factors on the cesarean section  
4  
5 decision. *Medical care* 1995;33(4):365-82.  
6  
7 20. Grant D. Explaining source of payment differences in U.S. cesarean rates: why do  
8  
9 privately insured mothers receive more cesareans than mothers who are not privately  
10  
11 insured? *Health Care Manag Sci* 2005;8(1):5-17.  
12  
13 21. Eltorai AE, Eltorai MI. The Risk of Expanding the Uninsured Population by Repealing  
14  
15 the Affordable Care Act. *Jama* 2017;317(14):1407-08. doi: 10.1001/jama.2017.2042  
16  
17 [published Online First: 2017/02/28]  
18  
19 22. Davis K. Uninsured in America: problems and possible solutions. *Bmj*  
20  
21 2007;334(7589):346-8. doi: 10.1136/bmj.39091.493588.BE [published Online First:  
22  
23 2007/02/17]  
24  
25 23. Ayanian JZ, Weissman JS, Schneider EC, et al. Unmet health needs of uninsured adults in  
26  
27 the United States. *Jama* 2000;284(16):2061-9. [published Online First: 2000/10/24]  
28  
29 24. Thorpe KE. Protecting the uninsured. *N Engl J Med* 2004;351(15):1479-81. doi:  
30  
31 10.1056/NEJMp048160 [published Online First: 2004/10/08]  
32  
33 25. Melnick GA, Fonkych K. Hospital pricing and the uninsured: do the uninsured pay higher  
34  
35 prices? *Health Aff (Millwood)* 2008;27(2):w116-22. doi: 10.1377/hlthaff.27.2.w116  
36  
37 [published Online First: 2008/02/07]  
38  
39 26. Hsu JY, Chen L, Gumer AR, et al. Disparities in the management of ectopic pregnancy.  
40  
41  
42 *Am J Obstet Gynecol* 2017;217(1):49 e1-49 e10. doi: 10.1016/j.ajog.2017.03.001  
43  
44  
45 27. Barnett JC, Berchick ER. Health insurance coverage in the United States: 2016.  
46  
47 Washington, DC: US Government Printing Office 2017:P60-260.  
48  
49  
50 28. Sommers BD, Blendon RJ, Orav EJ, et al. Changes in Utilization and Health Among  
51  
52 Low-Income Adults After Medicaid Expansion or Expanded Private Insurance. *JAMA*  
53  
54 *Intern Med* 2016;176(10):1501-09. doi: 10.1001/jamainternmed.2016.4419  
55  
56  
57  
58  
59  
60

- 1  
2  
3 29. Bauchner H. Health Care in the United States: A Right or a Privilege. *JAMA*  
4  
5 2017;317(1):29. doi: 10.1001/jama.2016.19687  
6  
7 30. Loehrer AP, Chang DC, Scott JW, et al. Association of the Affordable Care Act Medicaid  
8  
9 Expansion With Access to and Quality of Care for Surgical Conditions. *JAMA*  
10  
11 *surgery* 2018:e175568. doi: 10.1001/jamasurg.2017.5568  
12  
13 31. Holzmacher JL, Townsend K, Seavey C, et al. Association of Expanded Medicaid  
14  
15 Coverage With Hospital Length of Stay After Injury. *JAMA surgery*  
16  
17 2017;152(10):960-66. doi: 10.1001/jamasurg.2017.1720  
18  
19 32. Davis MM, Gebremariam A, Ayanian JZ. Changes in Insurance Coverage Among  
20  
21 Hospitalized Nonelderly Adults After Medicaid Expansion in Michigan. *JAMA*  
22  
23 2016;315(23):2617-8. doi: 10.1001/jama.2016.6303  
24  
25 33. Emanuel EJ. How Well Is the Affordable Care Act Doing?: Reasons for Optimism. *JAMA*  
26  
27 2016;315(13):1331-2. doi: 10.1001/jama.2016.2556  
28  
29 34. Long SK, Bart L, Karpman M, et al. Sustained Gains In Coverage, Access, And  
30  
31 Affordability Under The ACA: A 2017 Update. *Health Aff (Millwood)*  
32  
33 2017;36(9):1656-62. doi: 10.1377/hlthaff.2017.0798  
34  
35 35. Sommers BD, Maylone B, Blendon RJ, et al. Three-Year Impacts Of The Affordable  
36  
37 Care Act: Improved Medical Care And Health Among Low-Income Adults. *Health*  
38  
39 *Aff (Millwood)* 2017;36(6):1119-28. doi: 10.1377/hlthaff.2017.0293  
40  
41 36. Decker SL, Lipton BJ. Most Newly Insured People In 2014 Were Long-Term Uninsured.  
42  
43 *Health Aff (Millwood)* 2017;36(1):16-20. doi: 10.1377/hlthaff.2016.0984  
44  
45 37. Graves JA, Nikpay SS. The Changing Dynamics Of US Health Insurance And  
46  
47 Implications For The Future Of The Affordable Care Act. *Health Aff (Millwood)*  
48  
49 2017;36(2):297-305. doi: 10.1377/hlthaff.2016.1165  
50  
51  
52  
53  
54  
55  
56  
57  
58  
59  
60

- 1  
2  
3 38. Hayden JA, van der Windt DA, Cartwright JL, et al. Assessing bias in studies of  
4  
5 prognostic factors. *Ann Intern Med* 2013;158(4):280-6. doi: 10.7326/0003-4819-158-  
6  
7 4-201302190-00009  
8
- 9 39. DerSimonian R, Laird N. Meta-analysis in clinical trials. *Control Clin Trials*  
10  
11 1986;7(3):177-88.  
12
- 13 40. da Costa BR, Juni P. Systematic reviews and meta-analyses of randomized trials:  
14  
15 principles and pitfalls. *Eur Heart J* 2014;35(47):3336-45. doi:  
16  
17 10.1093/eurheartj/ehu424  
18
- 19 41. Haas JS, Udvarhelyi S, Epstein AM. The effect of health coverage for uninsured pregnant  
20  
21 women on maternal health and the use of cesarean section. *JAMA* 1993;270(1):61-4.  
22  
23
- 24 42. Braveman P, Egerter S, Edmonston F, et al. Racial/ethnic differences in the likelihood of  
25  
26 cesarean delivery, California. *American Journal of Public Health* 1995;85(5):625-30.  
27  
28
- 29 43. Onion DK, Meyer DL, Wennberg DE, et al. Primary cesarean section rates in uninsured,  
30  
31 Medicaid and insured populations of predominantly rural northern New England.  
32  
33 *Journal of Rural Health* 1999;15(1):108-12.  
34
- 35 44. Aron DC, Gordon HS, DiGiuseppe DL, et al. Variations in risk-adjusted cesarean  
36  
37 delivery rates according to race and health insurance. *Med Care* 2000;38(1):35-44.  
38  
39 [published Online First: 2000/01/12]  
40
- 41 45. Coonrod DV, Drachman D, Hobson P, et al. Nulliparous term singleton vertex cesarean  
42  
43 delivery rates: institutional and individual level predictors. *Am J Obstet Gynecol*  
44  
45 2008;198(6):694 e1-11; discussion 94 e11. doi: 10.1016/j.ajog.2008.03.026  
46  
47 [published Online First: 2008/06/10]  
48  
49
- 50 46. Huesch MD. Association between type of health insurance and elective cesarean  
51  
52 deliveries: New Jersey, 2004-2007. *Am J Public Health* 2011;101(11):e1-7. doi:  
53  
54 10.2105/AJPH.2011.300333  
55  
56  
57  
58  
59  
60

- 1  
2  
3 47. Huesch MD, Currid-Halkett E, Doctor JN. Measurement and risk adjustment of prelabor  
4 cesarean rates in a large sample of California hospitals. *Am J Obstet Gynecol*  
5 2014;210(5):443 e1-17. doi: 10.1016/j.ajog.2013.12.007 [published Online First:  
6 2013/12/10]  
7  
8  
9  
10  
11 48. Sebastiao YV, Womack L, Vamos CA, et al. Hospital variation in cesarean delivery rates:  
12 contribution of individual and hospital factors in Florida. *Am J Obstet Gynecol*  
13 2016;214(1):123 e1-23 e18. doi: 10.1016/j.ajog.2015.08.027 [published Online First:  
14 2015/08/21]  
15  
16  
17  
18  
19 49. Kozhimannil KB, Shippee TP, Adegoke O, et al. Trends in hospital-based childbirth care:  
20 the role of health insurance. *The American journal of managed care* 2013;19(4):e125-  
21 32.  
22  
23  
24  
25  
26 50. Hoxha I, Syrogiannouli L, Luta X, et al. Caesarean sections and for-profit status of  
27 hospitals: systematic review and meta-analysis. *BMJ Open* 2017;7(2):e013670. doi:  
28 10.1136/bmjopen-2016-013670 [published Online First: 2017/02/19]  
29  
30  
31  
32  
33 51. Epstein AJ, Nicholson S. The formation and evolution of physician treatment styles: an  
34 application to cesarean sections. *J Health Econ* 2009;28(6):1126-40. doi: S0167-  
35 6296(09)00077-0 [pii]  
36  
37  
38  
39 10.1016/j.jhealeco.2009.08.003 [doi] [published Online First: 2009/10/06]  
40  
41  
42 52. Little SE, Orav EJ, Robinson JN, et al. The relationship between variations in cesarean  
43 delivery and regional health care use in the United States. *Am J Obstet Gynecol* 2015  
44 doi: 10.1016/j.ajog.2015.12.023 [published Online First: 2016/01/02]  
45  
46  
47  
48 53. Barros PP. Cream-skimming, incentives for efficiency and payment system. *Journal of*  
49 *Health Economics* 2003;22(3):419-43. doi: 10.1016/s0167-6296(02)00119-4  
50  
51  
52  
53 54. Halpern MT, Ward EM, Pavluck AL, et al. Association of insurance status and ethnicity  
54 with cancer stage at diagnosis for 12 cancer sites: a retrospective analysis. *The Lancet*  
55  
56  
57  
58  
59

- 1  
2  
3 *Oncology* 2008;9(3):222-31. doi: 10.1016/s1470-2045(08)70032-9 [published Online  
4  
5 First: 2008/02/20]  
6
- 7 55. Pezzi TA, Schwartz DL, Mohamed ASR, et al. Barriers to Combined-Modality Therapy  
8  
9 for Limited-Stage Small-Cell Lung Cancer. *JAMA Oncol* 2018 doi:  
10  
11 10.1001/jamaoncol.2017.4504  
12
- 13 56. Ayanian JZ, Kohler BA, Abe T, et al. The relation between health insurance coverage and  
14  
15 clinical outcomes among women with breast cancer. *N Engl J Med* 1993;329(5):326-  
16  
17 31. doi: 10.1056/nejm199307293290507 [published Online First: 1993/07/29]  
18  
19
- 20 57. Koh H, Tavenner M. Connecting to health insurance coverage. *JAMA*  
21  
22 2013;309(18):1893-4. doi: 10.1001/jama.2013.3469  
23
- 24 58. Decker SL, Kostova D, Kenney GM, et al. Health status, risk factors, and medical  
25  
26 conditions among persons enrolled in Medicaid vs uninsured low-income adults  
27  
28 potentially eligible for Medicaid under the Affordable Care Act. *JAMA*  
29  
30 2013;309(24):2579-86. doi: 10.1001/jama.2013.7106  
31  
32
- 33 59. Decker SL, Kenney GM, Long SK. Characteristics of uninsured low-income adults in  
34  
35 states expanding vs not expanding Medicaid. *JAMA Intern Med* 2014;174(6):988-9.  
36  
37 doi: 10.1001/jamainternmed.2014.518  
38
- 39 60. Hellinger FJ. In Four ACA Expansion States, The Percentage Of Uninsured  
40  
41 Hospitalizations For People With HIV Declined, 2012-14. *Health Aff (Millwood)*  
42  
43 2015;34(12):2061-8. doi: 10.1377/hlthaff.2015.0718 [published Online First:  
44  
45 2015/12/09]  
46  
47
- 48 61. Newton MF, Keirns CC, Cunningham R, et al. Uninsured adults presenting to US  
49  
50 emergency departments: assumptions vs data. *Jama* 2008;300(16):1914-24. doi:  
51  
52 10.1001/jama.300.16.1914 [published Online First: 2008/10/23]  
53  
54  
55  
56  
57  
58  
59  
60



- 1  
2  
3 62. Shin JY, Yoon JK, Shin AK, et al. Association of Insurance and Community-Level  
4  
5 Socioeconomic Status With Treatment and Outcome of Squamous Cell Carcinoma of  
6  
7 the Pharynx. *JAMA Otolaryngol Head Neck Surg* 2017;143(9):899-907. doi:  
8  
9 10.1001/jamaoto.2017.0837  
10
- 11 63. Ellis L, Canchola AJ, Spiegel D, et al. Trends in Cancer Survival by Health Insurance  
12  
13 Status in California From 1997 to 2014. *JAMA Oncol* 2017 doi:  
14  
15 10.1001/jamaoncol.2017.3846  
16
- 17 64. Xu T, Park A, Bai G, et al. Variation in Emergency Department vs Internal Medicine  
18  
19 Excess Charges in the United States. *JAMA Intern Med* 2017;177(8):1139-45. doi:  
20  
21 10.1001/jamainternmed.2017.1598  
22
- 23 65. Colvin JD, Hall M, Berry JG, et al. Financial Loss for Inpatient Care of Medicaid-Insured  
24  
25 Children. *JAMA Pediatr* 2016;170(11):1055-62. doi:  
26  
27 10.1001/jamapediatrics.2016.1639  
28
- 29 66. Dranove D, Garthwaite C, Ody C. Uncompensated Care Decreased At Hospitals In  
30  
31 Medicaid Expansion States But Not At Hospitals In Nonexpansion States. *Health Aff*  
32  
33 *(Millwood)* 2016;35(8):1471-9. doi: 10.1377/hlthaff.2015.1344  
34  
35
- 36 67. Blavin F, Karpman M, Kenney GM, et al. Medicaid Versus Marketplace Coverage For  
37  
38 Near-Poor Adults: Effects On Out-Of-Pocket Spending And Coverage. *Health Aff*  
39  
40 *(Millwood)* 2018;37(2):299-307. doi: 10.1377/hlthaff.2017.1166  
41  
42
- 43 68. Sommers BD, Gunja MZ, Finegold K, et al. Changes in Self-reported Insurance  
44  
45 Coverage, Access to Care, and Health Under the Affordable Care Act. *JAMA*  
46  
47 2015;314(4):366-74. doi: 10.1001/jama.2015.8421  
48  
49
- 50 69. Jacobs PD, Duchovny N, Lipton BJ. Changes In Health Status And Care Use After ACA  
51  
52 Expansions Among The Insured And Uninsured. *Health Aff (Millwood)*  
53  
54 2016;35(7):1184-8. doi: 10.1377/hlthaff.2015.1539  
55  
56  
57  
58  
59

- 1  
2  
3 70. Mann C, Osius E. Medicaid's New Role in the Health Care System. *JAMA*  
4  
5 2015;314(4):343-4. doi: 10.1001/jama.2015.8433  
6  
7 71. James BC, Savitz LA. How Intermountain trimmed health care costs through robust  
8  
9 quality improvement efforts. *Health Aff (Millwood)* 2011;30(6):1185-91. doi:  
10  
11 hlthaff.2011.0358 [pii]  
12  
13  
14 10.1377/hlthaff.2011.0358 [doi] [published Online First: 2011/05/21]  
15  
16 72. Brown JR, Sox HC, Goodman DC. Financial incentives to improve quality: skating to the  
17  
18 puck or avoiding the penalty box? *JAMA* 2014;311(10):1009-10. doi:  
19  
20 10.1001/jama.2014.421  
21  
22  
23  
24  
25  
26  
27  
28  
29  
30  
31  
32  
33  
34  
35  
36  
37  
38  
39  
40  
41  
42  
43  
44  
45  
46  
47  
48  
49  
50  
51  
52  
53  
54  
55  
56  
57  
58  
59  
60

1  
2  
3  
4  
5  
6  
7  
8  
9  
10  
11  
12  
13  
14  
15  
16  
17  
18  
19  
20  
21  
22  
23  
24  
25  
26  
27  
28  
29  
30  
31  
32  
33  
34  
35  
36  
37  
38  
39  
40  
41  
42  
43  
44  
45  
46  
47

**Table 1. Characteristics of included studies**

| Author          | Year | State         | Study design         | Number of cases | Number of hospital units | Year of data collection | Population                          | Sampling    | Type of CS analyzed |
|-----------------|------|---------------|----------------------|-----------------|--------------------------|-------------------------|-------------------------------------|-------------|---------------------|
| Stafford        | 1990 | California    | Cross sectional      | 461066          | Not reported             | 1986                    | Primi- and multipara; any risk      | Consecutive | Any                 |
| Haas et al. A   | 1993 | Massachusetts | Cross sectional      | 57257           | Not reported             | 1984                    | Primi- and multipara; any risk      | Consecutive | Any                 |
| Haas et al. B   | 1993 | Massachusetts | Cross sectional      | 64346           | Not reported             | 1987                    | Primi- and multipara; any risk      | Consecutive | Any                 |
| Braveman et al. | 1995 | California    | Retrospective cohort | 213761          | Unclear                  | 1991                    | Primipara; no previous CS; any risk | Consecutive | Any                 |
| Burns et al.    | 1995 | Arizona       | Cross sectional      | 33233           | 36                       | 1989                    | Primi- and multipara; any risk      | Consecutive | Any                 |

|                                                                                                                                                                                                                                                                               |                   |      |                  |                         |        |                 |               |                                              |             |         |
|-------------------------------------------------------------------------------------------------------------------------------------------------------------------------------------------------------------------------------------------------------------------------------|-------------------|------|------------------|-------------------------|--------|-----------------|---------------|----------------------------------------------|-------------|---------|
| 1<br>2<br>3<br>4<br>5<br>6<br>7<br>8<br>9<br>10<br>11<br>12<br>13<br>14<br>15<br>16<br>17<br>18<br>19<br>20<br>21<br>22<br>23<br>24<br>25<br>26<br>27<br>28<br>29<br>30<br>31<br>32<br>33<br>34<br>35<br>36<br>37<br>38<br>39<br>40<br>41<br>42<br>43<br>44<br>45<br>46<br>47 | Onion et al.<br>A | 1999 | Maine            | Cross<br>sectional      | 41177  | Not<br>reported | 1990-<br>1992 | Primipara; no<br>previous CS; any risk       | Consecutive | Any     |
|                                                                                                                                                                                                                                                                               | Onion et al.<br>B | 1999 | New<br>Hampshire | Cross<br>sectional      | 41401  | Not<br>reported | 1990-<br>1992 | Primipara; no<br>previous CS; any risk       | Consecutive | Any     |
|                                                                                                                                                                                                                                                                               | Onion et al.<br>C | 1999 | Vermont          | Cross<br>sectional      | 19077  | Not<br>reported | 1990-<br>1992 | Primipara; no<br>previous CS; any risk       | Consecutive | Any     |
|                                                                                                                                                                                                                                                                               | Aron et al.       | 2000 | Ohio             | Retrospective<br>cohort | 25697  | 21              | 1993-<br>1995 | Primipara; no<br>previous CS; any risk       | Consecutive | Any     |
|                                                                                                                                                                                                                                                                               | Grant A           | 2005 | All states       | Cross<br>sectional      | 9017   | Not<br>reported | 1988          | Primi- and multipara;<br>any risk            | Random      | Any     |
|                                                                                                                                                                                                                                                                               | Grant B           | 2005 | Florida          | Cross<br>sectional      | 147821 | Not<br>reported | 1992          | Primi- and multipara;<br>any risk            | Consecutive | Any     |
|                                                                                                                                                                                                                                                                               | Coonrod et<br>al. | 2008 | Arizona          | Cross<br>sectional      | 28863  | 40              | 2005          | Primipara; low risk                          | Consecutive | Any     |
|                                                                                                                                                                                                                                                                               | Huesch            | 2011 | New Jersey       | Cross<br>sectional      | 182108 | Not<br>reported | 2004-<br>2007 | Primi- and multipara;<br>no previous CS; low | Consecutive | Planned |

1  
2  
3  
4  
5  
6  
7  
8  
9  
10  
11  
12  
13  
14  
15  
16  
17  
18  
19  
20  
21  
22  
23  
24  
25  
26  
27  
28  
29  
30  
31  
32  
33  
34  
35  
36  
37  
38  
39  
40  
41  
42  
43  
44  
45  
46  
47

|                    |      |            |                      |         |           |           |                                                |             |           |
|--------------------|------|------------|----------------------|---------|-----------|-----------|------------------------------------------------|-------------|-----------|
|                    |      |            |                      |         |           |           | risk                                           |             |           |
| Kozhimannil et al. | 2013 | All states | Cross sectional      | 6717486 | Over 1000 | 2002-2009 | Primi- and multipara; any risk                 | Random      | Any       |
| Huesch et al.      | 2014 | California | Cross sectional      | 408355  | 254       | 2010      | Primi- and multipara; no previous CS; any risk | Consecutive | Planned   |
| Sebastião et al.   | 2016 | Florida    | Retrospective cohort | 412192  | 122       | 2004-2011 | Primipara; no previous CS; low risk            | Consecutive | Emergency |

CS = caesarean section

1  
2  
3 **Figure legends**  
4

5 **Figure 1. The flow diagram of review**  
6

7 **Figure 2. Adjusted odds ratios of caesarean section**  
8

9 **Figure 3. Subgroup analyses for adjusted estimates/Legend: \*P for trend**  
10

11 **Figure 4. Crude odds ratios of caesarean section**  
12  
13  
14  
15

16  
17 **Supporting information**  
18

19 **Appendix 1. Search Strategy**  
20

21 **Appendix 2. Type of data used**  
22

23 **Appendix 3. Reported exclusion criteria**  
24

25 **Appendix 4. Covariates used for statistical adjustment**  
26

27 **Appendix 5. QUIPS risk of bias**  
28

29 **Appendix 6. Caesarean section rates among groups with different insurance status**  
30  
31  
32  
33  
34  
35  
36  
37  
38  
39  
40  
41  
42  
43  
44  
45  
46  
47  
48  
49  
50  
51  
52  
53  
54  
55  
56  
57  
58  
59  
60

Figure 1. The flow diagram of review

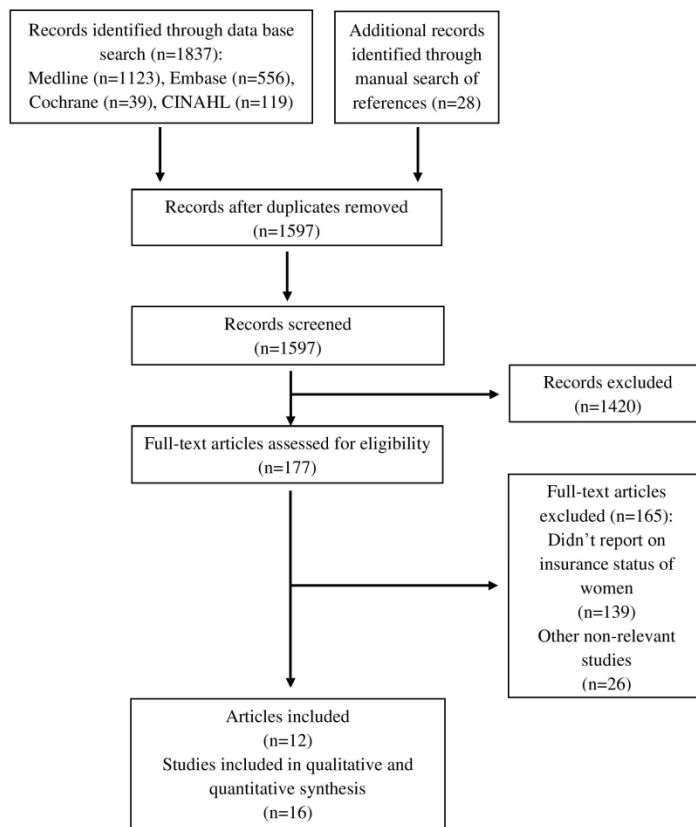

Figure 1. The flow diagram of review

215x279mm (300 x 300 DPI)

1  
2  
3  
4  
5  
6  
7  
8  
9  
10  
11  
12  
13  
14  
15  
16  
17  
18  
19  
20  
21  
22  
23  
24  
25  
26  
27  
28  
29  
30  
31  
32  
33  
34  
35  
36  
37  
38  
39  
40  
41  
42  
43  
44  
45  
46  
47  
48  
49  
50  
51  
52  
53  
54  
55  
56  
57  
58  
59  
60

Figure 2. Adjusted odds ratios of caesarean section

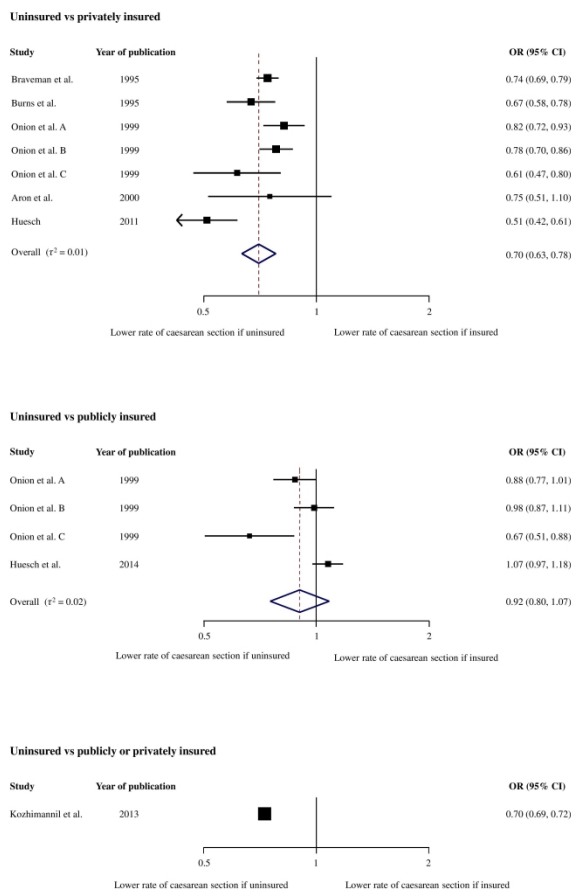

Figure 2. Adjusted odds ratios of caesarean section

338x518mm (300 x 300 DPI)



Figure 3. Subgroup analyses for adjusted estimates

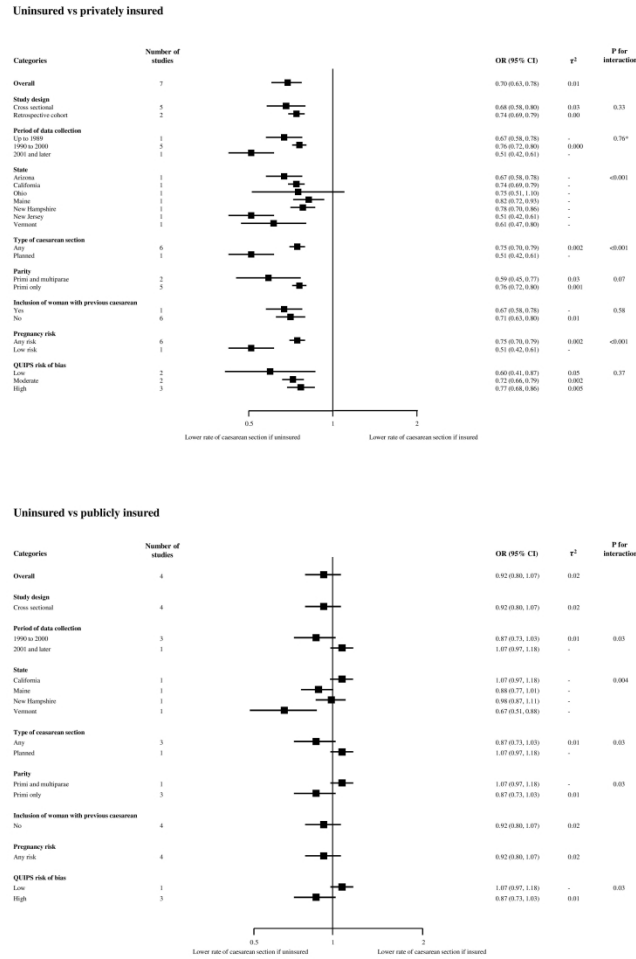

Figure 3. Subgroup analyses for adjusted estimates/Legend: \*P for trend

338x518mm (300 x 300 DPI)

Figure 4. Crude odds ratios of caesarean section

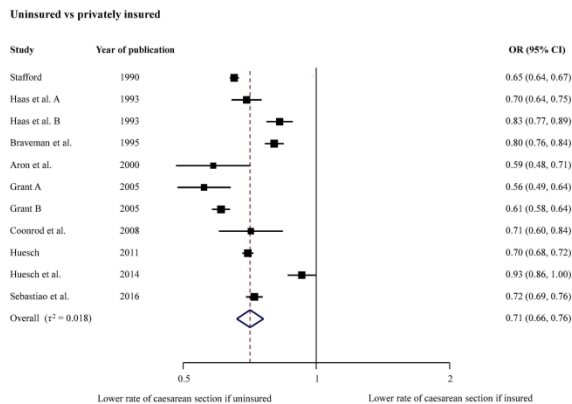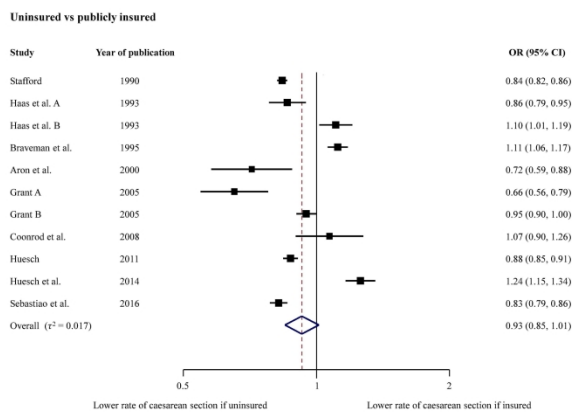

Figure 4. Crude odds ratios of caesarean section

279x361mm (300 x 300 DPI)

## Research Checklist

According to MOOSE statement for meta-analyses of observational studies

### Reporting of background should include

### Where to find in manuscript

Problem definition

Manuscript (page 5, 6)

Hypothesis statement

Manuscript (page 5, 6)

Description of study outcome(s)

Manuscript (page 6)

Type of exposure or intervention used

Manuscript (page 6)

Type of study designs used

Manuscript (page 6, 7)

Study population

Manuscript (page 6, 7) Table 1,  
Appendix 1

### Reporting of search strategy should include

Qualifications of searchers (eg, librarians and investigators)

Manuscript (page 1)

Search strategy, including time period included in the synthesis and keywords

Manuscript (page 6), Appendix 1

Effort to include all available studies, including contact with authors

Manuscript (page 6)

Databases and registries searched

Manuscript (page 6)

Search software used, name and version, including special features used (eg, explosion)

Manuscript (page 6)

Use of hand searching (eg, reference lists of obtained articles)

Manuscript (page 6)

List of citations located and those excluded, including justification

Figure 1

Method of addressing articles published in languages other than English

n/a

Method of handling abstracts and unpublished studies

Manuscript (page 6, 7)

Description of any contact with authors

No contact made

### Reporting of methods should include

Description of relevance or appropriateness of studies assembled for assessing the hypothesis to be tested

Manuscript (page 6, 7)

|                                                                |                                                                                                                                                                                                                                                                              |                                            |
|----------------------------------------------------------------|------------------------------------------------------------------------------------------------------------------------------------------------------------------------------------------------------------------------------------------------------------------------------|--------------------------------------------|
| 1<br>2<br>3<br>4<br>5<br>6<br>7                                | Rationale for the selection and coding of data (eg, sound clinical principles or convenience)                                                                                                                                                                                | Manuscript (page 6, 7)                     |
| 8<br>9<br>10<br>11<br>12<br>13<br>14<br>15<br>16<br>17<br>18   | Documentation of how data were classified and coded (eg, multiple raters, blinding, and interrater reliability)                                                                                                                                                              | Manuscript (pages 6, 7)                    |
| 19<br>20<br>21<br>22<br>23<br>24<br>25<br>26<br>27<br>28<br>29 | Assessment of confounding (eg, comparability of cases and controls in studies where appropriate)                                                                                                                                                                             | Manuscript (page 6-7), Appendix 2, 3, 4    |
| 30<br>31<br>32<br>33<br>34<br>35                               | Assessment of study quality, including blinding of quality assessors; stratification or regression on possible predictors of study results                                                                                                                                   | Manuscript (page 7), Figure 2, Appendix 5, |
| 36<br>37<br>38<br>39<br>40                                     | Assessment of heterogeneity                                                                                                                                                                                                                                                  | Manuscript (page 7)                        |
| 41<br>42<br>43<br>44<br>45<br>46<br>47                         | Description of statistical methods (eg, complete description of fixed or random effects models, justification of whether the chosen models account for predictors of study results, dose-response models, or cumulative meta-analysis) in sufficient detail to be replicated | Manuscript (page 7)                        |
| 48<br>49<br>50<br>51<br>52<br>53<br>54<br>55                   | Provision of appropriate tables and graphics                                                                                                                                                                                                                                 | Table 1, Figure 1-3 and Appendixes 1-7     |
| 56<br>57<br>58<br>59<br>60                                     | <b>Reporting of results should include</b>                                                                                                                                                                                                                                   |                                            |
|                                                                | Graphic summarizing individual study estimates and overall estimate                                                                                                                                                                                                          | Figure 2, Appendix 6                       |
|                                                                | Table giving descriptive information for each study included                                                                                                                                                                                                                 | Table 1                                    |
|                                                                | Results of sensitivity testing (eg, subgroup analysis)                                                                                                                                                                                                                       | Figure 3                                   |
|                                                                | Indication of statistical uncertainty of findings                                                                                                                                                                                                                            | Manuscript, Figure 2-4                     |
|                                                                | <b>Reporting of discussion should include</b>                                                                                                                                                                                                                                |                                            |
|                                                                | Quantitative assessment of bias (eg, publication bias)                                                                                                                                                                                                                       | Manuscript (page 8)                        |
|                                                                | Justification for exclusion (eg, exclusion of non—English-language citations)                                                                                                                                                                                                | Manuscript (page 8)                        |
|                                                                | Assessment of quality of included studies                                                                                                                                                                                                                                    | Manuscript (page 8)                        |

**Reporting of conclusions should include**

|    |                                                                 |                         |
|----|-----------------------------------------------------------------|-------------------------|
| 1  |                                                                 |                         |
| 2  | Consideration of alternative explanations for observed results  | Manuscript (pages 9-13) |
| 3  |                                                                 |                         |
| 4  | Generalization of the conclusions (ie, appropriate for the data | Manuscript (page 13)    |
| 5  |                                                                 |                         |
| 6  | presented and within the domain of the literature review)       |                         |
| 7  |                                                                 |                         |
| 8  | Guidelines for future research                                  | Manuscript (page 13)    |
| 9  |                                                                 |                         |
| 10 | Disclosure of funding source                                    | Manuscript (page 13)    |
| 11 |                                                                 |                         |
| 12 |                                                                 |                         |
| 13 |                                                                 |                         |
| 14 |                                                                 |                         |
| 15 |                                                                 |                         |
| 16 |                                                                 |                         |
| 17 |                                                                 |                         |
| 18 |                                                                 |                         |
| 19 |                                                                 |                         |
| 20 |                                                                 |                         |
| 21 |                                                                 |                         |
| 22 |                                                                 |                         |
| 23 |                                                                 |                         |
| 24 |                                                                 |                         |
| 25 |                                                                 |                         |
| 26 |                                                                 |                         |
| 27 |                                                                 |                         |
| 28 |                                                                 |                         |
| 29 |                                                                 |                         |
| 30 |                                                                 |                         |
| 31 |                                                                 |                         |
| 32 |                                                                 |                         |
| 33 |                                                                 |                         |
| 34 |                                                                 |                         |
| 35 |                                                                 |                         |
| 36 |                                                                 |                         |
| 37 |                                                                 |                         |
| 38 |                                                                 |                         |
| 39 |                                                                 |                         |
| 40 |                                                                 |                         |
| 41 |                                                                 |                         |
| 42 |                                                                 |                         |
| 43 |                                                                 |                         |
| 44 |                                                                 |                         |
| 45 |                                                                 |                         |
| 46 |                                                                 |                         |
| 47 |                                                                 |                         |
| 48 |                                                                 |                         |
| 49 |                                                                 |                         |
| 50 |                                                                 |                         |
| 51 |                                                                 |                         |
| 52 |                                                                 |                         |
| 53 |                                                                 |                         |
| 54 |                                                                 |                         |
| 55 |                                                                 |                         |
| 56 |                                                                 |                         |
| 57 |                                                                 |                         |
| 58 |                                                                 |                         |
| 59 |                                                                 |                         |
| 60 |                                                                 |                         |

## PRISMA checklist

|                           |   |                                                                                                                                                                                                                                                                                                             |                                       |
|---------------------------|---|-------------------------------------------------------------------------------------------------------------------------------------------------------------------------------------------------------------------------------------------------------------------------------------------------------------|---------------------------------------|
|                           |   |                                                                                                                                                                                                                                                                                                             |                                       |
| <b>TITLE</b>              |   |                                                                                                                                                                                                                                                                                                             |                                       |
| Title                     | 1 | Identify the report as a systematic review, meta-analysis, or both.                                                                                                                                                                                                                                         | Manuscript (page 1)                   |
| <b>ABSTRACT</b>           |   |                                                                                                                                                                                                                                                                                                             |                                       |
| Structured summary        | 2 | Provide a structured summary including, as applicable: background; objectives; data sources; study eligibility criteria, participants, and interventions; study appraisal and synthesis methods; results; limitations; conclusions and implications of key findings; systematic review registration number. | Manuscript (page 3,4)                 |
| <b>INTRODUCTION</b>       |   |                                                                                                                                                                                                                                                                                                             |                                       |
| Rationale                 | 3 | Describe the rationale for the review in the context of what is already known.                                                                                                                                                                                                                              | Manuscript (page 5,6)                 |
| Objectives                | 4 | Provide an explicit statement of questions being addressed with reference to participants, interventions, comparisons, outcomes, and study design (PICOS).                                                                                                                                                  | Manuscript (page 6)                   |
| <b>METHODS</b>            |   |                                                                                                                                                                                                                                                                                                             |                                       |
| Protocol and registration | 5 | Indicate if a review protocol exists, if and where it can be accessed (e.g., Web address), and, if available, provide registration information including registration number.                                                                                                                               | No published protocol or registration |
| Eligibility criteria      | 6 | Specify study characteristics (e.g., PICOS, length of follow-up) and report characteristics (e.g., years considered, language, publication status) used as criteria for eligibility, giving rationale.                                                                                                      | Manuscript (page 6)                   |
| Information sources       | 7 | Describe all information sources (e.g., databases with dates of coverage, contact with study authors to identify additional studies) in the search and date last searched.                                                                                                                                  | Manuscript (page 6)                   |
| Search                    | 8 | Present full electronic search strategy for at least one database, including any limits used, such that it could be repeated.                                                                                                                                                                               | Appendix 1                            |

|                                    |    |                                                                                                                                                                                                                        |                                                        |
|------------------------------------|----|------------------------------------------------------------------------------------------------------------------------------------------------------------------------------------------------------------------------|--------------------------------------------------------|
| Study selection                    | 9  | State the process for selecting studies (i.e., screening, eligibility, included in systematic review, and, if applicable, included in the meta-analysis).                                                              | Manuscript (page 6), Figure 1                          |
| Data collection process            | 10 | Describe method of data extraction from reports (e.g., piloted forms, independently, in duplicate) and any processes for obtaining and confirming data from investigators.                                             | Manuscript (page 6,7)                                  |
| Data items                         | 11 | List and define all variables for which data were sought (e.g., PICOS, funding sources) and any assumptions and simplifications made.                                                                                  | Manuscript (page 6,7)                                  |
| Risk of bias in individual studies | 12 | Describe methods used for assessing risk of bias of individual studies (including specification of whether this was done at the study or outcome level), and how this information is to be used in any data synthesis. | Manuscript (page 7)                                    |
| Summary measures                   | 13 | State the principal summary measures (e.g., risk ratio, difference in means).                                                                                                                                          | Manuscript (page 6)                                    |
| Synthesis of results               | 14 | Describe the methods of handling data and combining results of studies, if done, including measures of consistency (e.g., $I^2$ ) for each meta-analysis.                                                              | Manuscript (page 6, 7)                                 |
| Risk of bias across studies        | 15 | Specify any assessment of risk of bias that may affect the cumulative evidence (e.g., publication bias, selective reporting within studies).                                                                           | Manuscript (page 6)                                    |
| Additional analyses                | 16 | Describe methods of additional analyses (e.g., sensitivity or subgroup analyses, meta-regression), if done, indicating which were pre-specified.                                                                       | Manuscript (page 7)                                    |
| <b>RESULTS</b>                     |    |                                                                                                                                                                                                                        |                                                        |
| Study selection                    | 17 | Give numbers of studies screened, assessed for eligibility, and included in the review, with reasons for exclusions at each stage, ideally with a flow diagram.                                                        | Manuscript (page 8), Figure 1                          |
| Study characteristics              | 18 | For each study, present characteristics for which data were extracted (e.g., study size, PICOS, follow-up period) and provide the citations.                                                                           | Manuscript (page 8)<br>Table 1,<br>Appendix 2,<br>3, 4 |
| Risk of bias within studies        | 19 | Present data on risk of bias of each study and, if available, any outcome level assessment (see item 12).                                                                                                              | Manuscript                                             |

|                               |    |                                                                                                                                                                                                          |                                                     |
|-------------------------------|----|----------------------------------------------------------------------------------------------------------------------------------------------------------------------------------------------------------|-----------------------------------------------------|
|                               |    |                                                                                                                                                                                                          | (page 8),<br>Appendix 5                             |
| Results of individual studies | 20 | For all outcomes considered (benefits or harms), present, for each study: (a) simple summary data for each intervention group (b) effect estimates and confidence intervals, ideally with a forest plot. | Figure 2,<br>Appendix 6                             |
| Synthesis of results          | 21 | Present results of each meta-analysis done, including confidence intervals and measures of consistency.                                                                                                  | Manuscript<br>(page 8,9)<br>Figure 2,<br>Appendix 6 |
| Risk of bias across studies   | 22 | Present results of any assessment of risk of bias across studies (see Item 15).                                                                                                                          | Manuscript<br>(page 8),<br>Appendix 5               |
| Additional analysis           | 23 | Give results of additional analyses, if done (e.g., sensitivity or subgroup analyses, meta-regression [see Item 16]).                                                                                    | Manuscript<br>(page 9),<br>Figure 3,<br>Appendix 7  |
| <b>DISCUSSION</b>             |    |                                                                                                                                                                                                          |                                                     |
| Summary of evidence           | 24 | Summarize the main findings including the strength of evidence for each main outcome; consider their relevance to key groups (e.g., healthcare providers, users, and policy makers).                     | Manuscript<br>(page 9, 10)                          |
| Limitations                   | 25 | Discuss limitations at study and outcome level (e.g., risk of bias), and at review-level (e.g., incomplete retrieval of identified research, reporting bias).                                            | Manuscript<br>(page 10)                             |
| Conclusions                   | 26 | Provide a general interpretation of the results in the context of other evidence, and implications for future research.                                                                                  | Manuscript<br>(page 10-<br>13)                      |
| <b>FUNDING</b>                |    |                                                                                                                                                                                                          |                                                     |
| Funding                       | 27 | Describe sources of funding for the systematic review and other support (e.g., supply of data); role of funders for the systematic review.                                                               | Manuscript<br>(page 13)                             |



## Appendix 1. Search Strategy

### 1. For Medline (PubMed)

((((((causes OR determinants OR statistics OR rates OR factors OR decision\* OR physician\* OR socioeconomic OR state medicine OR evidence-based OR hospital OR hospitals OR hospitalization OR hospitalized OR uncertain\* OR educational status OR social class OR obstetric\* OR gynecolog\* OR supply OR distribut\* OR utilization OR insurance OR choice OR attitude OR patient OR economics OR maternal OR accessib\* OR health service\* OR rural population OR urban population[Title/Abstract])) NOT medline[sb])) OR ("Decision Making"[Mesh] OR "Physician's Practice Patterns"[Mesh] OR "Socioeconomic Factors"[Mesh] OR "State Medicine"[Mesh] OR "Evidence-Based Medicine"[Mesh] OR "Hospitals"[Mesh] OR "Uncertainty"[Mesh] OR "Educational Status"[Mesh] OR "Hospital Costs"[Mesh] OR "Physician Incentive Plans"[Mesh] OR "Social Class"[Mesh] OR "Obstetrics and Gynecology Department, Hospital"[Mesh] OR "supply and distribution"[Subheading] OR "utilization"[Subheading] OR "Insurance"[Mesh] OR "Choice Behavior"[Mesh] OR "Attitude to Health"[Mesh] OR "Patient Participation"[Mesh] OR "Physician-Patient Relations"[Mesh] OR "Economics, Hospital"[Mesh] OR "Maternal Health Services"[Mesh] OR "Health Services Accessibility"[Mesh] OR "Health Services Research"[Mesh] OR "Rural Population"[Mesh] OR "Urban Population"[Mesh])) OR factors OR rates OR statistics OR causes OR determinants AND (((operative delivery OR caesarean section OR cesarean section OR c-section OR c section OR caesarean OR cesarean OR caesarean delivery OR cesarean delivery OR caesarean rates OR cesarean rates)))) OR cesarean section [MeSH Terms])) AND (((("Catchment Area (Health)"[Mesh] OR "Small-Area Analysis"[Mesh])) OR (((small area analysis OR small area analyses OR medical practice variation OR regions OR geographic variation OR variation))))))

Appendix 2. Type of data used

| Author             | Year | Survey | Hospital records | Birth certificates/registry | Census data |
|--------------------|------|--------|------------------|-----------------------------|-------------|
| Stafford           | 1990 |        | +                |                             |             |
| Haas et al. A      | 1993 |        | +                | +                           |             |
| Haas et al. B      | 1993 |        | +                | +                           |             |
| Braveman et al.    | 1995 |        |                  | +                           | +           |
| Burns et al.       | 1995 |        | +                | +                           |             |
| Onion et al. A     | 1999 |        | +                |                             |             |
| Onion et al. B     | 1999 |        | +                |                             |             |
| Onion et al. C     | 1999 |        | +                |                             |             |
| Aron et al.        | 2000 |        | +                |                             |             |
| Grant A            | 2005 | +      |                  |                             |             |
| Grant B            | 2005 |        | +                |                             |             |
| Coonrod et al.     | 2008 |        |                  | +                           |             |
| Huesch             | 2011 |        | +                |                             |             |
| Kozhimannil et al. | 2013 |        | +                |                             |             |
| Huesch et al.      | 2014 |        | +                |                             |             |
| Sebastião et al.   | 2016 |        | +                | +                           |             |

**Appendix 3. Reported exclusion criteria**

| Authors            | Year | Source population                                | Maternal characteristics |                             |           |                            |                                          | Fetus characteristics |                                  |                           |                     |                       |                                       | Not in labor | Cases with missing data | Provider characteristics | Other factors |                                          |
|--------------------|------|--------------------------------------------------|--------------------------|-----------------------------|-----------|----------------------------|------------------------------------------|-----------------------|----------------------------------|---------------------------|---------------------|-----------------------|---------------------------------------|--------------|-------------------------|--------------------------|---------------|------------------------------------------|
|                    |      |                                                  | Age ≤14                  | Racial or ethnic minorities | Multipara | Previous caesarean section | Other risk factors for caesarean section | Stillbirth            | Multiple delivery (twin or more) | Newborn weighting <500 gr | Breach presentation | Other malpresentation | Preterm delivery (less than 37 weeks) |              |                         |                          |               | Other risk factors for caesarean section |
| Stafford           | 1990 | All deliveries in California, United States      |                          |                             |           |                            |                                          |                       |                                  |                           |                     |                       |                                       |              |                         |                          |               | +                                        |
| Haas et al. A      | 1993 | All deliveries in Massachusetts, United States   |                          |                             |           |                            |                                          | +                     | +                                | +                         |                     |                       |                                       |              |                         |                          |               | +                                        |
| Haas et al. B      | 1993 | All deliveries in Massachusetts, United States   |                          |                             |           |                            |                                          | +                     | +                                | +                         |                     |                       |                                       |              |                         |                          |               | +                                        |
| Braveman et al.    | 1995 | All deliveries in California, United States      |                          |                             | +         | +                          |                                          | +                     | +                                |                           |                     |                       | +                                     |              |                         |                          |               | +                                        |
| Burns et al.       | 1995 | All deliveries in Arizona, United States         |                          |                             |           |                            |                                          |                       |                                  |                           |                     |                       |                                       |              |                         |                          |               | +                                        |
| Onion et al. A     | 1999 | All deliveries in Maine, United States           |                          |                             | +         | +                          |                                          |                       | +                                |                           |                     |                       |                                       |              |                         |                          |               | +                                        |
| Onion et al. B     | 1999 | All deliveries in New Hampshire, United States   |                          |                             | +         | +                          |                                          |                       | +                                |                           |                     |                       |                                       |              |                         |                          |               | +                                        |
| Onion et al. C     | 1999 | All deliveries in Vermont, United States         |                          |                             | +         | +                          |                                          |                       | +                                |                           |                     |                       |                                       |              |                         |                          |               | +                                        |
| Aron et al.        | 2000 | All deliveries in Cleveland, Ohio, United States |                          |                             |           | +                          |                                          |                       |                                  | +                         | *                   |                       |                                       |              |                         |                          |               | +                                        |
| Grant A            | 2005 | All deliveries, United States                    |                          |                             |           |                            |                                          |                       |                                  |                           |                     |                       |                                       |              |                         |                          |               | +                                        |
| Grant B            | 2005 | All deliveries in Florida, United States         |                          |                             |           |                            |                                          |                       |                                  |                           |                     |                       |                                       |              |                         |                          |               | +                                        |
| Coonrod et al.     | 2008 | All deliveries in Arizona, United States         |                          | +                           | +         |                            |                                          | +                     | +                                |                           |                     | +                     | +                                     | +            |                         |                          |               | +                                        |
| Huesch             | 2011 | All deliveries in New Jersey, United States      |                          |                             |           | +                          | +                                        |                       | +                                |                           |                     | +                     | +                                     | +            | +                       |                          |               | +                                        |
| Kozhimannil et al. | 2013 | All deliveries in 44 states, United States       |                          |                             |           |                            |                                          |                       |                                  |                           |                     |                       |                                       |              |                         |                          |               | +                                        |
| Huesch et al.      | 2014 | All deliveries in California, United States      | +                        |                             |           | +                          |                                          |                       |                                  |                           |                     |                       |                                       |              | +                       |                          |               | +                                        |
| Sebastião et al.   | 2016 | All deliveries in Florida, United States         |                          |                             | +         | +                          |                                          | +                     | +                                |                           |                     | +                     | +                                     | +            | +                       |                          |               | +                                        |

\*500 or less grams

Appendix 4. Covariates used for statistical adjustment

| Author             | Year | Maternal preconception status |                   |                |                 |                   |              |        |        |                 |     | Maternal clinical status |                            |                                            |                                       | Fetus characteristics |              |                       | Prenatal care | Delivery characteristics | Provider characteristics | Other variables | Total number of covariates |    |    |   |    |    |    |    |    |    |    |    |    |     |    |
|--------------------|------|-------------------------------|-------------------|----------------|-----------------|-------------------|--------------|--------|--------|-----------------|-----|--------------------------|----------------------------|--------------------------------------------|---------------------------------------|-----------------------|--------------|-----------------------|---------------|--------------------------|--------------------------|-----------------|----------------------------|----|----|---|----|----|----|----|----|----|----|----|----|-----|----|
|                    |      | Ethnicity/Race                | Educational level | Marital status | Economic status | Insurances status | Urban status | Weight | Height | Body mass index | Age | Parity                   | Previous caesarean section | Pre-existing (before pregnancy) conditions | Conditions developed during pregnancy | Gestational age       | Birth weight | Other characteristics |               |                          |                          |                 |                            |    |    |   |    |    |    |    |    |    |    |    |    |     |    |
| Stafford*          | 1990 |                               |                   |                |                 |                   |              |        |        |                 |     |                          |                            |                                            |                                       |                       |              |                       |               |                          |                          |                 |                            |    |    |   |    |    |    |    |    |    |    |    |    | 0   |    |
| Haas et al. A*     | 1993 |                               |                   |                |                 |                   |              |        |        |                 |     |                          |                            |                                            |                                       |                       |              |                       |               |                          |                          |                 |                            |    |    |   |    |    |    |    |    |    |    |    |    |     | 0  |
| Haas et al. B*     | 1993 |                               |                   |                |                 |                   |              |        |        |                 |     |                          |                            |                                            |                                       |                       |              |                       |               |                          |                          |                 |                            |    |    |   |    |    |    |    |    |    |    |    |    |     | 0  |
| Braveman et al.    | 1995 | +                             | +                 | +              | +               | +                 |              |        |        |                 | +   |                          |                            |                                            |                                       |                       | +            |                       | +             | +                        | +                        | +               | +                          | ++ | +  | + | ++ | +  |    |    |    |    |    |    |    | 15  |    |
| Burns et al.       | 1995 | +                             | +                 |                |                 |                   |              |        |        |                 | +   | +                        | +                          |                                            |                                       |                       | ++           | +                     | +             | ++                       | +                        |                 |                            |    |    |   |    |    |    |    |    |    |    |    |    |     | 33 |
| Onion et al. A     | 1999 |                               |                   |                |                 |                   |              |        |        |                 | +   |                          |                            |                                            |                                       |                       |              |                       |               |                          |                          |                 |                            |    |    |   |    |    |    |    |    |    |    |    |    | 1   |    |
| Onion et al. B     | 1999 |                               |                   |                |                 |                   |              |        |        |                 | +   |                          |                            |                                            |                                       |                       |              |                       |               |                          |                          |                 |                            |    |    |   |    |    |    |    |    |    |    |    |    | 1   |    |
| Onion et al. C     | 1999 |                               |                   |                |                 |                   |              |        |        |                 | +   |                          |                            |                                            |                                       |                       |              |                       |               |                          |                          |                 |                            |    |    |   |    |    |    |    |    |    |    |    |    | 1   |    |
| Aron et al.        | 2000 |                               |                   |                |                 |                   |              |        |        |                 | +   | +                        |                            |                                            |                                       | ++                    | ++           | ++                    | +             | ++                       |                          |                 |                            |    |    |   |    |    |    |    |    |    |    |    |    | 39  |    |
| Grant A*           | 2005 |                               |                   |                |                 |                   |              |        |        |                 |     |                          |                            |                                            |                                       |                       |              |                       |               |                          |                          |                 |                            |    |    |   |    |    |    |    |    |    |    |    |    |     | 0  |
| Grant B*           | 2005 |                               |                   |                |                 |                   |              |        |        |                 |     |                          |                            |                                            |                                       |                       |              |                       |               |                          |                          |                 |                            |    |    |   |    |    |    |    |    |    |    |    |    |     | 0  |
| Coonrod et al.*    | 2008 |                               |                   |                |                 |                   |              |        |        |                 |     |                          |                            |                                            |                                       |                       |              |                       |               |                          |                          |                 |                            |    |    |   |    |    |    |    |    |    |    |    |    |     | 0  |
| Huesch             | 2011 | +                             |                   | +              |                 |                   |              |        |        |                 | +   |                          |                            |                                            |                                       |                       |              |                       |               |                          |                          |                 |                            |    |    |   |    |    |    |    |    |    |    | +  | ++ |     | 8  |
| Kozhimannil et al. | 2013 | +                             |                   |                |                 |                   |              |        |        |                 | +   | +                        | +                          | ++                                         | ++                                    | +                     |              |                       | ++            |                          |                          |                 |                            |    |    |   |    |    |    |    |    |    |    |    |    | 16  |    |
| Huesch et al.      | 2014 | +                             |                   |                | +               |                   |              |        |        |                 | +   |                          |                            | ++                                         | ++                                    | +                     |              |                       | ++            | +                        | ++                       | +               | ++                         | +  | ++ | + | ++ | ++ | ++ | ++ | ++ | ++ | ++ | ++ | ++ | 124 |    |
| Sebastião et al. * | 2016 |                               |                   |                |                 |                   |              |        |        |                 |     |                          |                            |                                            |                                       |                       |              |                       |               |                          |                          |                 |                            |    |    |   |    |    |    |    |    |    |    |    |    |     |    |

+ One covariate adjusted for ++ Two or more covariates adjusted for

\*Studies reported only crude estimates.

Appendix 5. QUIPS risk of bias

| Author                  | Year | Study Participation | Study Attrition | Prognostic Factor Measurement | Outcome Measurement | Study Confounding | Statistical Analysis and Reporting | Overall rating |
|-------------------------|------|---------------------|-----------------|-------------------------------|---------------------|-------------------|------------------------------------|----------------|
| Stafford 1990           | 1990 | low                 | low             | low                           | low                 | high              | moderate                           | high           |
| Haas et al. 1993 A      | 1993 | low                 | low             | low                           | low                 | high              | moderate                           | high           |
| Haas et al. 1993 B      | 1993 | low                 | low             | low                           | low                 | high              | moderate                           | high           |
| Braveman et al. 1995    | 1995 | low                 | low             | low                           | low                 | moderate          | low                                | moderate       |
| Burns et al. 1995       | 1995 | low                 | low             | low                           | low                 | moderate          | low                                | moderate       |
| Onion et al. 1999 A     | 1999 | low                 | low             | low                           | low                 | high              | low                                | high           |
| Onion et al. 1999 B     | 1999 | low                 | low             | low                           | low                 | high              | low                                | high           |
| Onion et al. 1999 C     | 1999 | low                 | low             | low                           | low                 | high              | low                                | high           |
| Aron et al. 2000        | 2000 | low                 | low             | low                           | low                 | low               | low                                | low            |
| Grant 2005 A            | 2005 | moderate            | high            | low                           | low                 | high              | low                                | high           |
| Grant 2005 B            | 2005 | low                 | low             | low                           | low                 | high              | low                                | high           |
| Coonrod et al. 2008     | 2008 | low                 | low             | low                           | low                 | high              | low                                | high           |
| Huesch 2011             | 2011 | low                 | low             | low                           | low                 | low               | low                                | low            |
| Kozhimannil et al. 2013 | 2012 | low                 | low             | low                           | low                 | low               | low                                | low            |
| Huesch et al. 2014      | 2013 | low                 | low             | low                           | low                 | low               | low                                | low            |
| Sebastião et al. 2016   | 2014 | low                 | low             | low                           | low                 | high              | low                                | high           |

review only

Appendix 6. Caesarean section rates among groups with different insurance status

| Author                  | Year | State         | Year of data collection | CS rate of privately insured (%) | CS rate of publicly insured (%) | CS rate of uninsured (%) |
|-------------------------|------|---------------|-------------------------|----------------------------------|---------------------------------|--------------------------|
| Stafford 1990           | 1990 | California    | 1986                    | 26.8                             | 22.1                            | 19.3                     |
| Haas et al. 1993 A      | 1993 | Massachusetts | 1984                    | 23.0                             | 19.4                            | 17.2                     |
| Haas et al. 1993 B      | 1993 | Massachusetts | 1987                    | 25.9                             | 20.8                            | 22.4                     |
| Braveman et al. 1995    | 1995 | California    | 1991                    | 27.1                             | 21.2                            | 23.0                     |
| Burns et al. 1995       | 1995 | Arizona       | 1989                    | n/a                              | n/a                             | n/a                      |
| Onion et al. 1999 A*    | 1999 | Maine         | 1990-1992               | 15.9                             | 14.9                            | 13.4                     |
| Onion et al. 1999 B*    | 1999 | New Hampshire | 1990-1992               | 16.1                             | 13.2                            | 13.0                     |
| Onion et al. 1999 C*    | 1999 | Vermont       | 1990-1992               | 14.5                             | 13.5                            | 9.4                      |
| Aron et al. 2000        | 2000 | Ohio          | 1993-1995               | 17.0                             | 14.2                            | 10.7                     |
| Grant 2005 A            | 2005 | All states    | 1988                    | 27.0                             | 23.7                            | 17.1                     |
| Grant 2005 B            | 2005 | Florida       | 1992                    | 30.0                             | 21.6                            | 20.7                     |
| Coonrod et al. 2008     | 2008 | Arizona       | 2005                    | 26.0                             | 19.0                            | 20.0                     |
| Huesch 2011             | 2011 | New Jersey    | 2004-2007               | 26.7                             | 22.5                            | 20.3                     |
| Kozhimannil et al. 2013 | 2012 | All states    | 2002-2009               | n/a                              | n/a                             | n/a                      |
| Huesch et al. 2014      | 2013 | California    | 2010                    | 13.9                             | 10.7                            | 13.0                     |
| Sebastião et al. 2016   | 2014 | Florida       | 2004-2011               | 25.2                             | 22.8                            | 19.7                     |

\*The rates are adjusted as compared to the rates from other studies which are crude rates.

CS rates bellow 15% benchmark

CS rates bellow 19% benchmark

# BMJ Open

## Caesarean Section in Uninsured Women in the United States: Systematic Review and Meta-analysis

|                                 |                                                                                                                                                                                                                                                                                                                                                                   |
|---------------------------------|-------------------------------------------------------------------------------------------------------------------------------------------------------------------------------------------------------------------------------------------------------------------------------------------------------------------------------------------------------------------|
| Journal:                        | <i>BMJ Open</i>                                                                                                                                                                                                                                                                                                                                                   |
| Manuscript ID                   | bmjopen-2018-025356.R1                                                                                                                                                                                                                                                                                                                                            |
| Article Type:                   | Research                                                                                                                                                                                                                                                                                                                                                          |
| Date Submitted by the Author:   | 14-Nov-2018                                                                                                                                                                                                                                                                                                                                                       |
| Complete List of Authors:       | Hoxha, Ilir; Kolegjin Heimerer, Health Management; Geisel School of Medicine at Dartmouth, Department of Community & Family Medicine Braha, Medina; International Business College Mitrovica, Syrogiannouli, Lamprini; Universität Bern, Berner Institut für Hausarztmedizin (BIHAM)<br>Goodman, David C; Dartmouth College Geisel School of Medicine Jüni, Peter |
| <b>Primary Subject Heading</b>: | Health economics                                                                                                                                                                                                                                                                                                                                                  |
| Secondary Subject Heading:      | Health services research, Obstetrics and gynaecology, Health policy                                                                                                                                                                                                                                                                                               |
| Keywords:                       | caesarean section, health insurance, uninsured, self-pay, medical practice variation, underuse                                                                                                                                                                                                                                                                    |
|                                 |                                                                                                                                                                                                                                                                                                                                                                   |

SCHOLARONE™  
Manuscripts

## Caesarean Section in Uninsured Women in the United States: Systematic Review and Meta-analysis

*Ilir HOXHA MD MSc PhD, Clinical Assistant Professor; <sup>abg</sup> Medina BRAHA PhD Candidate, Lecturer; <sup>c</sup> Lamprini SYROGIANNOULI MSc, Research Associate; <sup>d</sup> David C. GOODMAN MD MSc, Professor of Pediatrics; <sup>ae</sup> Peter JÜNI MD, Professor of Medicine and Director; <sup>f</sup>*

<sup>a</sup> Institute of Social and Preventive Medicine, University of Bern, 3012 Bern, Switzerland

<sup>b</sup> Department of Community & Family Medicine, Geisel School of Medicine at Dartmouth Hanover, NH 03755, United States

<sup>c</sup> International Business College Mitrovica, 40000 Mitrovica, Kosovo

<sup>d</sup> Institute of Primary Health Care, University of Bern, 3012 Bern, Switzerland

<sup>e</sup> The Dartmouth Institute for Health Policy and Clinical Practice, Lebanon, NH 03766, United States

<sup>f</sup> Applied Health Research Centre (AHRC), Li Ka Shing Knowledge Institute of St. Michael's Hospital, Department of Medicine, and Institute of Health Policy, Management and Evaluation, University of Toronto, M5B 1M8 Toronto, ON, Canada

<sup>g</sup> Heimerer College, 1000 Prishtina, Kosovo

*Correspondence to: Ilir Hoxha; [ilir.s.hoxha@dartmouth.edu](mailto:ilir.s.hoxha@dartmouth.edu); +383 45 588 683, Rruga e Shkupit Veternik PN, 10000 Prishtina, Kosovo*

### Keywords

caesarean section, health insurance, uninsured, self-pay, access to care, medical practice variation, health services, financial incentives, underuse, underserved

### Word count

Manuscript: 3147 words excluding title page, abstract, references, figures and tables.



## Abstract

**Objective:** The aim of this study is to assess the odds of caesarean section for uninsured women in the United States and understand the underlying mechanisms as well as consequences of lower use.

**Study design:** Systematic review and meta-analysis.

**Data sources:** PubMed, Embase, The Cochrane Library and CINAHL from the first year of records through April 2018.

**Eligibility criteria:** We included studies that reported data to allow the calculation of odds ratios of caesarean section of uninsured as compared to insured women.

**Outcomes:** The pre-specified primary outcome was the adjusted odds ratio of deliveries by caesarean section of uninsured women as compared with privately or publicly insured women. The pre-specified secondary outcome was the crude odds ratio of deliveries by caesarean section of uninsured women as compared with insured women.

**Results:** Twelve articles describing sixteen separate studies involving more than 8.8 million women were included in this study. We found: 0.70 times lower odds of caesarean section in uninsured as compared to privately insured women (95%CI 0.63 to 0.78), with no relevant heterogeneity between studies ( $\tau^2=0.01$ ); and, 0.92 times lower odds for caesarean section in uninsured as compared to publicly insured women (95%CI 0.80, 1.07), with no relevant heterogeneity between studies ( $\tau^2=0.02$ ). We found 0.70 times lower odds in uninsured as compared to privately and publicly insured women (95%CI 0.69, 0.72).

**Conclusions:** Caesarean sections are less likely to be performed in uninsured women as compared with insured women. While the higher rates for CS among privately insured women can be explained with financial incentives associated with private insurance, the lower odds among uninsured women draw attention at barriers to access for delivery care. In

1  
2  
3 many regions the rates for uninsured women are above, close or below the benchmarks for  
4  
5 appropriate caesarean section rates and could imply both, underuse and overuse. .  
6  
7  
8  
9  
10  
11  
12  
13  
14  
15  
16  
17  
18  
19  
20  
21  
22  
23  
24  
25  
26  
27  
28  
29  
30  
31  
32  
33  
34  
35  
36  
37  
38  
39  
40  
41  
42  
43  
44  
45  
46  
47  
48  
49  
50  
51  
52  
53  
54  
55  
56  
57  
58  
59  
60

For peer review only

## Strengths and limitations of this study

- ✓ Extensive literature search, screening and data extraction performed in duplicate, review and analysis of study characteristics as well as thorough quality assessment of included studies.
- ✓ All studies are from one country, i.e. the United States, and this limits the effect of contextual factors.
- ✓ A major limitation of our study is the variation across studies, in terms of the study populations characteristics, type of data used, types of caesarean section analyzed and adjusting variables used in statistical analyses.
- ✓ The results of this study are driven by the largest study which contains over two thirds of the population included in this review. Only five out of 16 studies included in the review report data after year 2000.
- ✓ While a population level caesarean section rate of less than 9, 10 or 19 percent suggests underuse, we cannot determine the mix of under, over, and appropriate use in a specific population.

## Introduction

Introduction of clinical procedures in medical practice have saved and improved the lives of many people worldwide. But with time, these clinical procedures become subject to overuse or underuse; i.e. some people get them without really needing them while others do not get them although in need of them.<sup>1</sup> As a result, overuse of procedures may result in unnecessary harm due to the side effects of the procedures or, in case of underuse, not receiving the care they need.<sup>1-3</sup> These adverse effects occur due to differing health systems and other contextual factors.<sup>3,4</sup> These factors include financial and non-financial barriers in accessing healthcare, present even in the most advanced economies of the world, such as the United States (US). Consequently, specific segments of the population may be underserved as healthcare systems are unable to address structural problems that leave patients without the care they need.<sup>1</sup>

Globally, Caesarean section (CS) is an example of overuse and underuse of clinical procedures. Once introduced into clinical practice, it greatly improved maternal and newborn outcomes.<sup>5</sup> Presently, many countries have long exceeded the 9 to 16 percent or 10 to 15 percent thresholds or 19 percent benchmark for CS out of total deliveries, argued to be the ideal rates of CS in terms of improving the health of women and newborns.<sup>6-9</sup> CS rates average as high as 40.5 percent among countries in Latin America and the Caribbean region,<sup>10</sup> 32.3 percent in Northern America<sup>10</sup> (32.2 percent in US),<sup>11</sup> while on the other extreme, it is as low as 7.3 percent in Africa<sup>10</sup> and known to range even lower in specific countries: 1 percent in Nepal and Cambodia to 0.6 percent in Ethiopia and Niger.<sup>12</sup> Variations are also observed within countries,<sup>5, 12, 13</sup> for instance, in the US a recent study reported a range between 4 to 65 percent across health markets.<sup>14</sup>

Insurance coverage is one health system factors known to influence the use of medical procedures,<sup>15, 16</sup> including CS.<sup>17-20</sup> While private insurance, for example, seems to increase the odds of having a CS delivery,<sup>17</sup> the lack of insurance appears to decrease it.<sup>20-22</sup> Millions of

1  
2  
3 people worldwide, as well as in the US, are not covered by any insurance scheme and are  
4  
5 exposed to the hazard of being underserved with clinical procedures,<sup>23-27</sup> including perinatal  
6  
7 services.<sup>28</sup> The US has a mixed health insurance system dominated by private insurance.<sup>24</sup>  
8  
9 The Federal Medicare program, covers people over 64 years old and/or disabled, which  
10  
11 accounts for about 16.7 percent of the population.<sup>24</sup> State Medicaid programs cover children  
12  
13 and parents from low income families as well as partially caring for Medicare beneficiaries  
14  
15 with low incomes and, in total, accounts for about 19.4 percent of the US population.<sup>29</sup> Over  
16  
17 half of US population is covered with voluntary employer based private insurance.<sup>29</sup> The  
18  
19 remaining population is uninsured and can range from 2.5 (Massachusetts) to 16.6 (Texas)  
20  
21 percent according to 2016 estimates.<sup>29</sup> For decades, in the US, there has been an ongoing  
22  
23 debate for and against universal health coverage and related topics with limited but  
24  
25 substantial progress towards more coverage through the Affordable Care Act (ACA).<sup>23 30-37</sup>  
26  
27 Nonetheless, millions of Americans remain uninsured for various reasons and are not able to  
28  
29 access the healthcare they need.<sup>23 31 38</sup> The aim of this study is to assess the odds of CS for  
30  
31 uninsured women in the US and understand the underlying mechanisms as well as  
32  
33 consequences of lower use in the US context.<sup>39</sup>  
34  
35  
36  
37  
38  
39  
40

## 41 **Materials and methods**

### 42 ***Search strategy and data sources***

43  
44 Search words referring to CS, such as 'caesarean section', 'caesarean delivery', 'caesarean',  
45  
46 were combined with words referring to factors contributing to variation and increase of CS  
47  
48 rates, such as 'insurance', 'social class', 'socioeconomic', and words referring to study  
49  
50 design, such as 'geographic variation', 'medical practice variation' (Appendix 1). No  
51  
52 publication date or language restrictions were applied. We searched PubMed, Embase, the  
53  
54 Cochrane Library and CINAHL from the beginning of records to the end of April 2018, when  
55  
56  
57  
58  
59  
60

1  
2  
3 we last updated our search. A manual search was applied on the reference lists of included  
4  
5 studies and previous systematic reviews.  
6  
7

### 8 ***Study selection and outcomes***

9  
10 To be included in the analysis, studies had to report odds ratio (OR) or data that enabled the  
11  
12 calculation of OR of CS comparing uninsured against privately and/or publicly insured  
13  
14 women. More specifically, we didn't exclude studies based on any population characteristic.  
15  
16 Studies had to report normal (vaginal) and CS deliveries with uninsured and privately and/or  
17  
18 publicly insured comparisons. In an ideal situation, studies would report adjusted OR of  
19  
20 uninsured as compared to privately and/or publicly insured women, but in cases ORs were  
21  
22 not calculated by the authors, we would extract data (rates and regression coefficients) and  
23  
24 perform calculations that would allow for the derivation of OR. We didn't exclude studies by  
25  
26 type of study design, variables used for adjustment or any other study characteristic. Adjusted  
27  
28 OR of deliveries by CS of uninsured women in comparison to insured women was the pre-  
29  
30 specified primary outcome. Crude OR of deliveries by CS of uninsured women in  
31  
32 comparison to insured women was the pre-specified secondary outcome.  
33  
34  
35  
36  
37

### 38 ***Data extraction***

39  
40 Papers screening and independent data extraction was done by two researchers (IH and MB).  
41  
42 Differences were resolved based on consensus. We extracted data on study population, study  
43  
44 design, data sources, setting, type of CS analyzed, statistical analysis, and (primary and  
45  
46 secondary) outcome measures. (Appendix 2)  
47  
48  
49

### 50 ***Quality assessment***

51  
52 We used Quality In Prognostic Studies (QUIPS) to assess the risk of bias across six study  
53  
54 domains.<sup>40</sup> Each study was evaluated independently by two researchers (IH and MB) and any  
55  
56 differences among evaluators were discussed and resolved. A single rating was assigned for  
57  
58 all studies. As specified in the QUIPS tool, a "high", "moderate", or "low" rating was applied  
59  
60

1  
2  
3 for individual domains and overall rating of a study.<sup>40</sup> If a study was rated with a low risk of  
4 bias across all the six domains, it would receive an overall rating of low risk of bias.<sup>17</sup> If one  
5 or more domains of a study were rated with a moderate risk of bias, it would receive an  
6 overall moderate risk of bias.<sup>17</sup> If one or more domains of a study were rated with a high risk  
7 of bias, it would receive an overall high risk of bias.<sup>17</sup>

### 15 ***Main analysis***

16  
17 Standard inverse-variance random effects meta-analysis was used to combine the overall  
18 ORs. An OR lower than one implies a lower frequency of CS in uninsured than in insured  
19 women. We calculated  $\tau^2$  to measure heterogeneity between studies.<sup>41</sup> Pre-specified cutoffs of  
20  $\tau^2$  of 0.04, 0.16 and 0.36 were used to represent low, moderate, and high heterogeneity  
21 between studies.<sup>42</sup> Subgroup analysis by study design, period of data collection, state, type of  
22 CS analyzed, parity, inclusion of women with previous CS, pregnancy risk of included  
23 women and level of (QUIPS) risk of bias was performed to examine between-study  
24 heterogeneity and chi-square test was used to calculate p-values for interaction among  
25 subgroups. Test for linear trend was performed in case of more than two ordered strata. All p-  
26 values were two-sided. STATA, release 13, was used for analyses (Stata-Corp, College  
27 Station, Texas).

### 43 ***Additional analysis***

44 We calculated CS rates among different insurance subgroups for the studies included in the  
45 analysis.

### 51 ***Patient involvement***

52 No patients were involved in this study. We used data from published papers only.

## 57 **Results**

1  
2  
3 We identified a total of 1837 records: 1123 from PubMed; 556 from Embase; 39 from the  
4  
5 Cochrane Library, 119 from CINAHL and 28 from manual search (Figure 1). We removed  
6  
7 240 duplicates. 1597 records were screened for eligibility. We performed full text  
8  
9 examination on 177 records. We excluded 139 that did not report insurance status of  
10  
11 women<sup>43-181</sup> and 26 that were otherwise irrelevant.<sup>182-207</sup> (Appendix 3) Finally, 12 records  
12  
13 describing 16 separate studies<sup>20-22 62 208-215</sup> including more than 8.8 million women were  
14  
15 included in review and meta-analysis.  
16  
17

18  
19 Characteristics of studies are presented in Table 1 and Appendices 4, 5, 6 and 7. All studies  
20  
21 were from the US. Thirteen studies were cross-sectional and three were retrospective cohort  
22  
23 studies. Population size of studies ranged from 9,017 to 6,717,486 cases. Studies used data  
24  
25 from years 1986 to 2011 and most studies used hospital records data (Appendix 4). Case  
26  
27 exclusion criteria varied considerably (Appendix 5) as well as variables studies used for  
28  
29 statistical adjustment (Appendix 6). Appendix 7 reports evaluation of studies using QUIPS  
30  
31 risk of bias tool. Four studies were classified with low risk of bias, two studies with moderate  
32  
33 risk, and ten studies with high risk of bias (Appendix 7).  
34  
35

36  
37 Figure 2 presents meta-analyses for primary outcome measure, i.e. adjusted ORs of CS in  
38  
39 uninsured women as compared to privately or publicly insured. Since there was a positive  
40  
41 interaction between uninsured vs privately insured group and uninsured vs publicly insured  
42  
43 group ( $p=0.016$ ), we performed meta-analyses for each group separately. In the meta-analysis  
44  
45 comparing uninsured with privately insured women, including seven studies in 556,454  
46  
47 women, we found that the odds of CS were 0.70 times lower in uninsured as compared to  
48  
49 privately insured women (95%CI 0.63 to 0.78), with no relevant heterogeneity between  
50  
51 studies ( $\tau^2=0.01$ ). In meta-analysis comparing uninsured with publicly insured women,  
52  
53 including four studies in 510,010 women, we found that the odds of CS were 0.92 times  
54  
55 lower in uninsured as compared to publicly insured women (95%CI 0.80 to 1.07), with no  
56  
57  
58  
59  
60



1  
2  
3 relevant heterogeneity between studies ( $\tau^2=0.02$ ). An additional study in 6,717,486 women,  
4 which did not distinguish between privately and publicly insured women,<sup>215</sup> reported that the  
5 odds of CS were 0.70 times lower in uninsured as compared to insured women (95%CI 0.69  
6 to 0.72).  
7  
8  
9  
10  
11

12  
13 Figure 3 presents results of subgroup analyses of adjusted odds ratios in uninsured vs  
14 privately insured women (upper panel) and in uninsured vs publicly insured women (lower  
15 panel). In the analysis of uninsured vs privately insured women, estimates varied for  
16 subgroups state (p for interaction<0.001), type of CS (p for interaction<0.001), parity (p for  
17 interaction=0.07), and pregnancy risk (p for interaction<0.001). There was no positive trend  
18 in the period of data collection subgroup. In the lower panel, which presents subgroup  
19 analyses of adjusted odds ratios in uninsured vs publicly insured women, estimates varied for  
20 subgroups period of data collection (p for interaction=0.03), state (p for interaction=0.004),  
21 type of CS (p for interaction=0.03), parity (p for interaction=0.03) and QUIPS risk of bias (p  
22 for interaction=0.03).  
23  
24  
25  
26  
27  
28  
29  
30  
31  
32  
33  
34  
35

36  
37 In Figure 4 we present meta-analyses for crude ORs of CS in uninsured as compared to  
38 privately or publicly insured women as secondary outcome. In the meta-analysis comparing  
39 uninsured with privately insured women, including eleven studies in 2,010,483 women, we  
40 found that the odds of CS were 0.71 times lower in uninsured as compared to privately  
41 insured women (95%CI 0.66 to 0.76), with no relevant heterogeneity between studies  
42 ( $\tau^2=0.018$ ). In the meta-analysis comparing uninsured with publicly insured women,  
43 including eleven studies in 2,010,483 women, we found that the odds of CS were 0.93 times  
44 lower in uninsured as compared to publicly insured women (95%CI 0.85 to 1.01), with no  
45 relevant heterogeneity between studies ( $\tau^2=0.017$ ).  
46  
47  
48  
49  
50  
51  
52  
53  
54  
55  
56

57  
58 Table 2 presents rates of CS among groups with different insurance status for individual  
59 studies. Six studies found CS rates for uninsured women below the 19 percent benchmark.  
60

1  
2  
3 One study found CS rates below the 10 percent benchmark. The rates of other studies range  
4  
5 from 19.3 percent to 23.0 percent, close to 19 percent benchmark.  
6  
7

## 8 9 **Discussion**

10  
11 Our systematic review and meta-analyses estimated that the overall odds of receiving a  
12  
13 caesarean section are on average 0.70 times lower for uninsured women as compared with  
14  
15 privately insured women (95%CI 0.63 to 0.78), 0.92 times lower for uninsured women as  
16  
17 compared with publicly insured women (95%CI 0.80 to 1.07) and 0.70 times lower for  
18  
19 uninsured women as compared to privately and publicly insured women (95%CI 0.69 to  
20  
21 0.72). The lower odds were noticed across all subgroups of studies in subgroup analyses as  
22  
23 well as in crude analyses.  
24  
25  
26

## 27 28 **Context**

29  
30 To our knowledge, this is the first meta-analysis that examines CS rates of uninsured women  
31  
32 compared to insured women. Two recently published meta-analyses by our group reported  
33  
34 the association of CS with for profit status of hospitals and type of insurance.<sup>17 216</sup>  
35  
36

37 Investigating the association of for-profit vs non-profit status of hospital with the odds of CS,  
38  
39 we found that the odds of CS were 1.41 higher in for-profit hospitals as compared with non-  
40  
41 profit hospitals (95% CI 1.24 to 1.60).<sup>216</sup> The findings were consistent in subgroup  
42  
43 analyses.<sup>216</sup> Investigating the association of CS with private insurance, we found that the odds  
44  
45 of CS were 1.13 times higher for privately insured women compared with women covered  
46  
47 with public insurance (95% CI 1.07 to 1.18).<sup>17</sup> Again, the increased risk was observed across  
48  
49 all subgroups.<sup>17</sup>  
50  
51  
52

## 53 54 **Strengths and limitations**

55  
56 The major strengths of our meta-analysis include an extensive literature search, screening and  
57  
58 data extraction performed in duplicate, review and analysis of study characteristics as well as  
59  
60

1  
2  
3 thorough quality assessment of included studies. In addition, all studies are from one country,  
4  
5 i.e. the US, and this limits the effect of contextual factors. A major limitation is the variation  
6  
7 across studies, in terms of the study populations characteristics (i.e. parity, inclusion of  
8  
9 women with previous CS, risk for CS), type of data used, types of CS analyzed and adjusting  
10  
11 variables used in statistical analyses. The results of this study are driven by the largest study  
12  
13 which contains over two thirds of the population included in this review. Only five out of 16  
14  
15 studies included in the review report data after year 2000. It should also be taken into  
16  
17 consideration, that despite similar features, the uninsured are a diverse group of US citizens.<sup>26</sup>  
18  
19  
20  
21 <sup>27</sup> We considered but could not make use of the Robson criteria to classify studies and  
22  
23 analyze CS rates among the studies reviewed. Only two out of sixteen studies could be  
24  
25 classified using the Robson criteria.<sup>62 214</sup> While a population level CS rate of less than 9, 10 or  
26  
27 19 percent suggests underuse, we cannot determine the mix of under, over, and appropriate  
28  
29 use in a specific population.  
30  
31

### 32 33 ***Mechanism***

34  
35 There are several possible explanations why uninsured women have lower odds of CS when  
36  
37 compared to insured women. One likely factor is that financial incentives are stronger with  
38  
39 private insurance than in the publicly insured or uninsured.<sup>17 18</sup> These incentives result from  
40  
41 higher payment for CS by private insurers through reimbursement arrangements that  
42  
43 encourage more expensive procedures as means to increase profits, as well as providers'  
44  
45 (hospitals and individual physicians) responses to these incentives.<sup>17 70 216</sup> The responses to  
46  
47 incentives by hospitals exist in the form of patient scheduling policies that direct privately  
48  
49 insured patients to profit inclined physicians.<sup>20 216</sup> It is also a known association that  
50  
51 physicians who have a higher share of privately insured patients will tend to overuse CS.<sup>21 22</sup>  
52  
53  
54  
55 <sup>216</sup> They do so as they perceive patients to have a higher social class, i.e. able to pay higher  
56  
57 fees, or fear malpractice liability.<sup>18 111 208 216</sup>  
58  
59  
60

1  
2  
3 Additional reasons are likely reflected in the comparison between uninsured and publicly  
4 insured women. A first set of reasons are related to deliberate or forced decisions of  
5 uninsured women to keep out-of-pocket payments low.<sup>18</sup> The uninsured patients are more  
6 likely to seek less expensive care when they face the need for healthcare services.<sup>18</sup> In the  
7 case of giving birth, this would lead to a greater preference for vaginal delivery. A second set  
8 of reasons may be discrimination of providers towards uninsured women. Providers have a  
9 preference for profitable, i.e. privately insured patients, a preference commonly referred to as  
10 “cream skimming”.<sup>21 22 216 217</sup>  
11  
12  
13  
14  
15  
16  
17  
18  
19  
20  
21

### 22 ***Implications for uninsured women***

23  
24 Most studies included in our meta-analysis, including the most recent studies from  
25 California<sup>213</sup> and Florida,<sup>214</sup> show that rates for CS among uninsured women are below or  
26 close to the 10 and 19 percent benchmarks previously reported.<sup>6-8</sup> Even in instances where  
27 the average state rates are slightly above the 19 percent benchmark, some hospitals service  
28 areas are likely to have CS rates lower than 19 percent or even 9 percent for uninsured  
29 women because of the well-established within state variation in CS rates.<sup>5 111</sup> Uninsured  
30 women in these areas are highly likely to be underserved with caesarean section during  
31 delivery. Uninsured patients generally have higher unmet needs than insured patients due to  
32 access barriers.<sup>23 24 26 28 218-222</sup> Such barriers encourage inappropriate health seeking behaviors  
33 among uninsured.<sup>23-25 32 220 223-225</sup> Consequently, uninsured populations face higher health  
34 risks and have worse healthcare outcomes.<sup>23-26 32 218-221 223 224 226 227</sup>  
35  
36  
37  
38  
39  
40  
41  
42  
43  
44  
45  
46  
47  
48  
49

50 The uninsured also face financial burdens which result from out-of-pocket payments that are  
51 more severe/extensive than co-payments or premiums that are paid by people that are  
52 publicly or privately insured. The uninsured are known to pay higher prices for services as  
53 compared to other payers for the same care,<sup>27 228</sup> spend a high portion of income to cover  
54 medical expenses<sup>24</sup> (although they spend less for their health compared to patients who have  
55  
56  
57  
58  
59  
60

1  
2  
3 insurance),<sup>26</sup> are frequently charged for full price for healthcare services,<sup>24 228</sup> often do not  
4 benefit from discounts from providers,<sup>24 27</sup> and face severe financial difficulties.<sup>23 24</sup>

5  
6  
7 Uninsured manage to pay only part of the costs for their care.<sup>26</sup> The remaining costs are  
8 uncompensated costs<sup>23 26 229 230</sup> and most of such costs are covered by the local, state or  
9 federal government,<sup>26 229</sup> eventually resulting in tax increases.<sup>26</sup>

### 15 ***Implications for research and policy making***

16  
17 Future studies should examine the association of a lack of insurance in pregnant women  
18 across health care markets with varying CS rates and assess if delivery outcomes were  
19 correspondingly worse, in the effort to investigate the presence of underuse of CS.

20  
21  
22 In parallel, policy options that could lead to improvements of insurance coverage for  
23 delivering women should be assessed in terms of their ability to address healthcare outcomes  
24 while keeping overall costs at minimum. In the past, states have adopted different strategies  
25 for covering uninsured people.<sup>24 25 39 231</sup> While there are many known benefits to insurance  
26 coverage,<sup>23 24 32-35 37 221 224 230 232-234</sup> other important policy aspects should be considered. At a  
27 time of rising healthcare costs<sup>24 35 234 235</sup> regulation of financial incentives is crucial. A  
28 revision of payment policies should be pursued<sup>17 18 24 216</sup> to align financial incentives with  
29 proper health outcomes.<sup>17 24 216</sup> Reimbursement policies that would pay the same amount for  
30 CS and vaginal delivery is one option.<sup>216 236</sup>

### 46 ***Conclusion***

47  
48 Caesarean sections are less likely to be performed in uninsured women as compared with  
49 insured women. The lower odds are consistent in all subgroups and in crude analyses. While  
50 the higher rates for CS among privately insured women can be explained with financial  
51 incentives associated with private insurance, the lower odds among uninsured women draw  
52 attention at barriers to access for delivery care. In many regions, the rates for uninsured  
53 women are above, close or below the benchmarks for appropriate CS rates and imply both,

1  
2  
3 underuse and overuse. Therefore, efforts to assess the delivery outcomes as well as policy  
4 options that could improve insurance coverage for women giving birth are important.  
5  
6  
7  
8

## 9 **Acknowledgments**

### 10 ***Exclusive Licence***

11  
12 *The Corresponding Author has the right to grant on behalf of all authors and does grant on*  
13 *behalf of all authors, an exclusive licence (or non-exclusive for government employees) on a*  
14 *worldwide basis to the BMJ Publishing Group Ltd and its Licensees to permit this article (if*  
15 *accepted) to be published in BMJ Open and any other BMJ PGL products to exploit all*  
16 *subsidiary rights, as set out in our licence [http://journals.bmj.com/site/authors/editorial-](http://journals.bmj.com/site/authors/editorial-policies.xhtml#copyright)*  
17 *policies.xhtml#copyright and the Corresponding Author accepts and understands that any*  
18 *supply made under these terms is made by BMJ PGL to the Corresponding Author. All*  
19 *articles published in BMJ Open will be made available on an Open Access basis (with*  
20 *authors being asked to pay an open access fee - see*  
21 *<http://bmjopen.bmj.com/site/about/resources.xhtml>) Access shall be governed by a Creative*  
22 *Commons licence – details as to which Creative Commons licence will apply to the article*  
23 *are set out in our licence referred to above.*  
24  
25  
26  
27  
28  
29  
30  
31  
32  
33  
34  
35  
36  
37  
38  
39  
40  
41

### 42 ***Contributorship Statement***

43  
44 IH, DG, PJ conceived and designed the study. IH, MB performed the data extraction and  
45 preparation. IH, LS analyzed the data. IH, MB, LS drafted the paper, which was critically  
46 reviewed and approved by all authors.  
47  
48  
49  
50

### 51 ***Acknowledgement***

52  
53 We thank Doris Kopp and Beatrice Minder for their valuable help during development of the  
54 search strategy, Arjana Shala for her help with literature search and Hossein Meyer-Troeltsch  
55 and Rand Engel for their support with editing.  
56  
57  
58  
59  
60

**Competing interests statement**

All authors have completed the ICMJE uniform disclosure form at [www.icmje.org/coi\\_disclosure.pdf](http://www.icmje.org/coi_disclosure.pdf) and declare: no support from any organisation for the submitted work; no financial relationships with any organisations that might have an interest in the submitted work in the previous three years; no other relationships or activities that could appear to have influenced the submitted work.

**Funding statement**

No funding was received to perform this study. All authors, had full access to all of the data (including statistical reports and tables) in the study and take responsibility for the integrity of the data and the accuracy of the data analysis.

**Data sharing statement**

No additional unpublished data are available from the study.

## References

1. Saini V, Brownlee S, Elshaug AG, et al. Addressing overuse and underuse around the world. *The Lancet* 2017;390(10090):105-07. doi: 10.1016/s0140-6736(16)32573-9
2. Berwick DM. Avoiding overuse—the next quality frontier. *The Lancet* 2017;390(10090):102-04. doi: 10.1016/s0140-6736(16)32570-3
3. Wennberg JE. Tracking medicine : a researcher's quest to understand health care. First Edition ed. Oxford: Oxford University Press 2011.
4. Poma PA. Effects of obstetrician characteristics on cesarean delivery rates. A community hospital experience. *Am J Obstet Gynecol* 1999;180(6 Pt 1):1364-72. doi: S0002937899003658 [pii] [published Online First: 1999/06/16]
5. Hoxha I, Busato A, Luta X. Medical Practice Variations in Reproductive, Obstetric, and Gynecological Care. In: Johnson A, Stukel TA, eds. Medical Practice Variations. Boston, MA: Springer US 2016:141-60.
6. Molina G, Weiser TG, Lipsitz SR, et al. Relationship Between Cesarean Delivery Rate and Maternal and Neonatal Mortality. *JAMA* 2015;314(21):2263-70. doi: 10.1001/jama.2015.15553
7. Betran AP, Torloni MR, Zhang JJ, et al. WHO Statement on Caesarean Section Rates. *BJOG* 2016;123(5):667-70. doi: 10.1111/1471-0528.13526
8. Appropriate technology for birth. *Lancet* 1985;2(8452):436-7.
9. Betran AP, Torloni MR, Zhang J, et al. What is the optimal rate of caesarean section at population level? A systematic review of ecologic studies. *Reproductive health* 2015;12:57. doi: 10.1186/s12978-015-0043-6 [published Online First: 2015/06/22]
10. Betran AP, Ye J, Moller AB, et al. The Increasing Trend in Caesarean Section Rates: Global, Regional and National Estimates: 1990-2014. *PLoS One*



- 2016;11(2):e0148343. doi: 10.1371/journal.pone.0148343 [published Online First: 2016/02/06]
11. OECD. Health at a Glance 2017: OECD Indicators: OECD Publishing, 2017.
12. Betran AP, Meriardi M, Lauer JA, et al. Rates of caesarean section: analysis of global, regional and national estimates. *Paediatr Perinat Epidemiol* 2007;21(2):98-113. doi: 10.1111/j.1365-3016.2007.00786.x
13. Boatin AA, Schlottheuber A, Betran AP, et al. Within country inequalities in caesarean section rates: observational study of 72 low and middle income countries. *BMJ (Clinical research ed)* 2018;360:k55. doi: 10.1136/bmj.k55 [published Online First: 2018/01/26]
14. Little SE, Orav EJ, Robinson JN, et al. The relationship between variations in cesarean delivery and regional health care use in the United States. *Am J Obstet Gynecol* 2016;214(6):735.e1-8. doi: 10.1016/j.ajog.2015.12.023 [published Online First: 2016/01/02]
15. Haas S, Acker D, Donahue C, et al. Variation in hysterectomy rates across small geographic areas of Massachusetts. *Am J Obstet Gynecol* 1993;169(1):150-4. [published Online First: 1993/07/01]
16. Jacoby VL, Vittinghoff E, Nakagawa S, et al. Factors associated with undergoing bilateral salpingo-oophorectomy at the time of hysterectomy for benign conditions. *Obstet Gynecol* 2009;113(6):1259-67. doi: 10.1097/AOG.0b013e3181a66c42
17. Hoxha I, Syrogiannouli L, Braha M, et al. Caesarean sections and private insurance: systematic review and meta-analysis. *BMJ open* 2017;7(8):e016600. doi: 10.1136/bmjopen-2017-016600 [published Online First: 2017/08/23]

- 1  
2  
3 18. Keeler EB, Brodie M. Economic incentives in the choice between vaginal delivery and  
4  
5 cesarean section. *Milbank Q* 1993;71(3):365-404. [published Online First:  
6  
7 1993/01/01]  
8  
9
- 10 19. Haas JS, Udvarhelyi S, Epstein AM. The effect of health coverage for uninsured pregnant  
11  
12 women on maternal health and the use of cesarean section [see comments]. *Jama*  
13  
14 1993; 270(1). [http://onlinelibrary.wiley.com/o/cochrane/clcentral/articles/860/CN-](http://onlinelibrary.wiley.com/o/cochrane/clcentral/articles/860/CN-00597860/frame.html)  
15  
16 [00597860/frame.html](http://onlinelibrary.wiley.com/o/cochrane/clcentral/articles/860/CN-00597860/frame.html).  
17  
18
- 19 20. Stafford RS. Cesarean section use and source of payment: An analysis of California  
20  
21 hospital discharge abstracts. *American Journal of Public Health* 1990;80(3):313-15.  
22  
23
- 24 21. Burns LR, Geller SE, Wholey DR. The effect of physician factors on the cesarean section  
25  
26 decision. *Medical care* 1995;33(4):365-82.  
27  
28
- 29 22. Grant D. Explaining source of payment differences in U.S. cesarean rates: why do  
30  
31 privately insured mothers receive more cesareans than mothers who are not privately  
32  
33 insured? *Health Care Manag Sci* 2005;8(1):5-17.  
34  
35
- 36 23. Eltorai AE, Eltorai MI. The Risk of Expanding the Uninsured Population by Repealing  
37  
38 the Affordable Care Act. *Jama* 2017;317(14):1407-08. doi: 10.1001/jama.2017.2042  
39  
40 [published Online First: 2017/02/28]  
41  
42
- 43 24. Davis K. Uninsured in America: problems and possible solutions. *Bmj*  
44  
45 2007;334(7589):346-8. doi: 10.1136/bmj.39091.493588.BE [published Online First:  
46  
47 2007/02/17]  
48
- 49 25. Ayanian JZ, Weissman JS, Schneider EC, et al. Unmet health needs of uninsured adults in  
50  
51 the United States. *Jama* 2000;284(16):2061-9. [published Online First: 2000/10/24]  
52  
53
- 54 26. Thorpe KE. Protecting the uninsured. *N Engl J Med* 2004;351(15):1479-81. doi:  
55  
56 10.1056/NEJMp048160 [published Online First: 2004/10/08]  
57  
58  
59  
60

- 1  
2  
3 27. Melnick GA, Fonkych K. Hospital pricing and the uninsured: do the uninsured pay higher  
4 prices? *Health Aff (Millwood)* 2008;27(2):w116-22. doi: 10.1377/hlthaff.27.2.w116  
5  
6 [published Online First: 2008/02/07]  
7  
8  
9  
10 28. Hsu JY, Chen L, Gumer AR, et al. Disparities in the management of ectopic pregnancy.  
11  
12 *Am J Obstet Gynecol* 2017;217(1):49 e1-49 e10. doi: 10.1016/j.ajog.2017.03.001  
13  
14  
15 29. Barnett JC, Berchick ER. Health insurance coverage in the United States: 2016.  
16  
17 Washington, DC: US Government Printing Office 2017:P60-260.  
18  
19  
20 30. Sommers BD, Blendon RJ, Orav EJ, et al. Changes in Utilization and Health Among  
21  
22 Low-Income Adults After Medicaid Expansion or Expanded Private Insurance. *JAMA*  
23  
24 *Intern Med* 2016;176(10):1501-09. doi: 10.1001/jamainternmed.2016.4419  
25  
26  
27 31. Bauchner H. Health Care in the United States: A Right or a Privilege. *JAMA*  
28  
29 2017;317(1):29. doi: 10.1001/jama.2016.19687  
30  
31 32. Loehrer AP, Chang DC, Scott JW, et al. Association of the Affordable Care Act Medicaid  
32  
33 Expansion With Access to and Quality of Care for Surgical Conditions. *JAMA*  
34  
35 *surgery* 2018:e175568. doi: 10.1001/jamasurg.2017.5568  
36  
37  
38 33. Holzmacher JL, Townsend K, Seavey C, et al. Association of Expanded Medicaid  
39  
40 Coverage With Hospital Length of Stay After Injury. *JAMA surgery*  
41  
42 2017;152(10):960-66. doi: 10.1001/jamasurg.2017.1720  
43  
44  
45 34. Davis MM, Gebremariam A, Ayanian JZ. Changes in Insurance Coverage Among  
46  
47 Hospitalized Nonelderly Adults After Medicaid Expansion in Michigan. *JAMA*  
48  
49 2016;315(23):2617-8. doi: 10.1001/jama.2016.6303  
50  
51  
52 35. Emanuel EJ. How Well Is the Affordable Care Act Doing?: Reasons for Optimism. *JAMA*  
53  
54 2016;315(13):1331-2. doi: 10.1001/jama.2016.2556  
55  
56  
57  
58  
59  
60

- 1  
2  
3 36. Long SK, Bart L, Karpman M, et al. Sustained Gains In Coverage, Access, And  
4  
5 Affordability Under The ACA: A 2017 Update. *Health Aff (Millwood)*  
6  
7 2017;36(9):1656-62. doi: 10.1377/hlthaff.2017.0798  
8  
9
- 10 37. Sommers BD, Maylone B, Blendon RJ, et al. Three-Year Impacts Of The Affordable  
11  
12 Care Act: Improved Medical Care And Health Among Low-Income Adults. *Health*  
13  
14 *Aff (Millwood)* 2017;36(6):1119-28. doi: 10.1377/hlthaff.2017.0293  
15  
16
- 17 38. Decker SL, Lipton BJ. Most Newly Insured People In 2014 Were Long-Term Uninsured.  
18  
19 *Health Aff (Millwood)* 2017;36(1):16-20. doi: 10.1377/hlthaff.2016.0984  
20  
21
- 22 39. Graves JA, Nikpay SS. The Changing Dynamics Of US Health Insurance And  
23  
24 Implications For The Future Of The Affordable Care Act. *Health Aff (Millwood)*  
25  
26 2017;36(2):297-305. doi: 10.1377/hlthaff.2016.1165  
27  
28
- 29 40. Hayden JA, van der Windt DA, Cartwright JL, et al. Assessing bias in studies of  
30  
31 prognostic factors. *Ann Intern Med* 2013;158(4):280-6. doi: 10.7326/0003-4819-158-  
32  
33 4-201302190-00009  
34
- 35 41. DerSimonian R, Laird N. Meta-analysis in clinical trials. *Control Clin Trials*  
36  
37 1986;7(3):177-88.  
38  
39
- 40 42. da Costa BR, Juni P. Systematic reviews and meta-analyses of randomized trials:  
41  
42 principles and pitfalls. *Eur Heart J* 2014;35(47):3336-45. doi:  
43  
44 10.1093/eurheartj/ehu424  
45  
46
- 47 43. Adhikari Dahal K, Premji S, Patel AB, et al. Variation in Maternal Co-morbidities and  
48  
49 Obstetric Interventions across Area-Level Socio-economic Status: A Cross-Sectional  
50  
51 Study. *Paediatr Perinat Epidemiol* 2017;31(4):274-83. doi: 10.1111/ppe.12370  
52  
53 [published Online First: 2017/06/08]  
54  
55
- 56 44. Armstrong CE, Martinez-Alvarez M, Singh NS, et al. Subnational variation for care at  
57  
58 birth in Tanzania: is this explained by place, people, money or drugs? *BMC public*  
59  
60

- 1  
2  
3 *health* 2016;16 Suppl 2:795. doi: 10.1186/s12889-016-3404-3 [published Online  
4  
5 First: 2016/09/17]  
6  
7
- 8 45. Bailit JL, Landon MB, Thom E, et al. The MFMU Cesarean Registry: impact of time of  
9  
10 day on cesarean complications. *American Journal of Obstetrics & Gynecology*  
11  
12 2006;195(4):1132-37.  
13  
14
- 15 46. Bannister-Tyrrell M, Patterson JA, Ford JB, et al. Variation in hospital caesarean section  
16  
17 rates for preterm births. *Aust N Z J Obstet Gynaecol* 2015;55(4):350-6. doi:  
18  
19 10.1111/ajo.12351 [published Online First: 2015/08/01]  
20  
21
- 22 47. Blais R. Variations in surgical rates in Quebec: does access to teaching hospitals make a  
23  
24 difference? *CMAJ* 1993;148(10):1729-36. [published Online First: 1993/05/15]  
25  
26
- 27 48. Brown HS, 3rd. Lawsuit activity, defensive medicine, and small area variation: the case  
28  
29 of Cesarean sections revisited. *Health Econ Policy Law* 2007;2(Pt 3):285-96. doi:  
30  
31 S1744133107004136 [pii]  
32  
33 10.1017/S1744133107004136 [doi] [published Online First: 2008/07/19]  
34  
35
- 36 49. Butcher AH, Fos PJ, Zuniga M, et al. Racial variations in cesarean section rates: an  
37  
38 analysis of Medicaid data in Louisiana. *J Public Health Manag Pract* 1997;3(2):41-8.  
39  
40 [published Online First: 1997/02/06]  
41  
42
- 43 50. Caceres IA, Arcaya M, Declercq E, et al. Hospital differences in cesarean deliveries in  
44  
45 Massachusetts (US) 2004-2006: the case against case-mix artifact. *PLoS One*  
46  
47 2013;8(3):e57817. doi: 10.1371/journal.pone.0057817  
48  
49
- 50 PONE-D-12-27646 [pii] [published Online First: 2013/03/26]  
51  
52
- 53 51. Carayol M, Blondel B, Zeitlin J, et al. Changes in the rates of caesarean delivery before  
54  
55 labour for breech presentation at term in France: 1972-2003. *Eur J Obstet Gynecol*  
56  
57 *Reprod Biol* 2007;132(1):20-6. doi: 10.1016/j.ejogrb.2006.05.017 [published Online  
58  
59 First: 2006/06/27]  
60

- 1  
2  
3 52. Carayol M, Zein A, Ghosn N, et al. Determinants of caesarean section in Lebanon:  
4  
5 Geographical differences. *Paediatric and Perinatal Epidemiology* 2008;22(2):136-44.  
6  
7  
8 53. Carayol M, Zeitlin J, Roman H, et al. Non-clinical determinants of planned cesarean  
9  
10 delivery in cases of term breech presentation in France. *Acta Obstet Gynecol Scand*  
11  
12 2007;86(9):1071-8. doi: 781481577 [pii]  
13  
14  
15 10.1080/00016340701505242 [doi] [published Online First: 2007/08/23]  
16  
17  
18 54. Carlisle DM, Leake BD, Brook RH, et al. The effect of race and ethnicity on the use of  
19  
20 selected health care procedures: a comparison of south central Los Angeles and the  
21  
22 remainder of Los Angeles county. *J Health Care Poor Underserved* 1996;7(4):308-  
23  
24 22. [published Online First: 1996/11/01]  
25  
26  
27 55. Chen C, Cheng Z, Jiang P, et al. Effect of the new maternity insurance scheme on medical  
28  
29 expenditures for caesarean delivery in Wuxi, China: a retrospective pre/post-reform  
30  
31 case study. *Frontiers of medicine* 2016;10(4):473-80. doi: 10.1007/s11684-016-0479-  
32  
33 2 [published Online First: 2016/11/30]  
34  
35  
36 56. Chen C-S, Liu T-C, Chen B, et al. The failure of financial incentive? The seemingly  
37  
38 inexorable rise of cesarean section. *Social Science & Medicine* 2014;101:47-51. doi:  
39  
40 10.1016/j.socscimed.2013.11.010  
41  
42  
43 57. Clark SL, Belfort MA, Hankins GD, et al. Variation in the rates of operative delivery in  
44  
45 the United States. *Am J Obstet Gynecol* 2007;196(6):526 e1-5. doi: S0002-  
46  
47 9378(07)00095-6 [pii]  
48  
49  
50 10.1016/j.ajog.2007.01.024 [doi] [published Online First: 2007/06/06]  
51  
52  
53 58. Clark SL, Perlin JB, Fraker S, et al. Association of obstetric intervention with temporal  
54  
55 patterns of childbirth. *Obstet Gynecol* 2014;124(5):873-80. doi:  
56  
57 10.1097/aog.0000000000000485 [published Online First: 2014/12/02]  
58  
59  
60

- 1  
2  
3 59. Clarke SC, Taffel S. Changes in cesarean delivery in the United States, 1988 and 1993.  
4  
5 *Birth* 1995;22(2):63-7. [published Online First: 1995/06/01]  
6  
7  
8 60. Clarke SC, Taffel SM. State variation in rates of cesarean and VBAC delivery: 1989 and  
9  
10 1993. *Stat Bull Metrop Insur Co* 1996;77(1):28-36. [published Online First:  
11  
12 1996/01/01]  
13  
14  
15 61. Clayton HB, Sappenfield WM, Gulitz E, et al. The Florida Investigation of Primary Late  
16  
17 Preterm and Cesarean Delivery: the accuracy of the birth certificate and hospital  
18  
19 discharge records. *Maternal and child health journal* 2013;17(5):869-78.  
20  
21  
22 62. Coonrod DV, Drachman D, Hobson P, et al. Nulliparous term singleton vertex cesarean  
23  
24 delivery rates: institutional and individual level predictors. *Am J Obstet Gynecol*  
25  
26 2008;198(6):694 e1-11; discussion 94 e11. doi: 10.1016/j.ajog.2008.03.026  
27  
28 [published Online First: 2008/06/10]  
29  
30  
31 63. Coulm B, Le Ray C, Lelong N, et al. Obstetric interventions for low-risk pregnant women  
32  
33 in France: do maternity unit characteristics make a difference? *Birth (Berkeley, Calif)*  
34  
35 2012;39(3):183-91.  
36  
37  
38 64. Da Silva Campi SF, Nascimento LFC. Spatial distribution of C-sections within the state  
39  
40 of Sao Paulo. *Revista da Associacao Medica Brasileira* 2014;60(5):419-23.  
41  
42  
43 65. Daw JR, Sommers BD. Association of the Affordable Care Act Dependent Coverage  
44  
45 Provision With Prenatal Care Use and Birth Outcomes. *JAMA: Journal of the*  
46  
47 *American Medical Association* 2018;319(6):579-87. doi: 10.1001/jama.2018.0030  
48  
49  
50 66. de Regt RH, Minkoff HL, Feldman J, et al. Relation of private or clinic care to the  
51  
52 cesarean birth rate. *N Engl J Med* 1986;315(10):619-24. doi:  
53  
54 10.1056/nejm198609043151005 [published Online First: 1986/09/04]  
55  
56  
57 67. Di Mario S, Cattaneo A, Gagliotti C, et al. Baby-friendly hospitals and cesarean section  
58  
59 rate: A survey of Italian hospitals. *Breastfeeding Medicine* 2013;8(4):388-93.  
60

- 1  
2  
3 68. Eckerlund I, Gerdtham UG. Econometric analysis of variation in cesarean section rates. A  
4 cross-sectional study of 59 obstetrical departments in Sweden. *Int J Technol Assess*  
5 *Health Care* 1998;14(4):774-87. [published Online First: 1999/01/14]  
6  
7  
8  
9  
10 69. Edmonds JK, O'Hara M, Clarke SP, et al. Variation in Cesarean Birth Rates by Labor and  
11 Delivery Nurses. *Journal of obstetric, gynecologic, and neonatal nursing : JOGNN*  
12 2017;46(4):486-93. doi: 10.1016/j.jogn.2017.03.009 [published Online First:  
13 2017/05/28]  
14  
15  
16  
17  
18  
19 70. Epstein AJ, Nicholson S. The formation and evolution of physician treatment styles: an  
20 application to cesarean sections. *J Health Econ* 2009;28(6):1126-40. doi: S0167-  
21 6296(09)00077-0 [pii]  
22 10.1016/j.jhealeco.2009.08.003 [doi] [published Online First: 2009/10/06]  
23  
24  
25  
26  
27  
28  
29 71. Franca GV, Restrepo-Mendez MC, Maia MF, et al. Coverage and equity in reproductive  
30 and maternal health interventions in Brazil: impressive progress following the  
31 implementation of the Unified Health System. *Int J Equity Health* 2016;15(1):149.  
32 doi: 10.1186/s12939-016-0445-2 [published Online First: 2016/11/18]  
33  
34  
35  
36  
37  
38 72. Garcia FA, Miller HB, Huggins GR, et al. Effect of academic affiliation and obstetric  
39 volume on clinical outcome and cost of childbirth. *Obstet Gynecol* 2001;97(4):567-  
40 76. [published Online First: 2001/03/29]  
41  
42  
43  
44  
45 73. Gates PE. Think globally, act locally: an approach to implementation of clinical practice  
46 guidelines. *Jt Comm J Qual Improv* 1995;21(2):71-84. [published Online First:  
47 1995/02/01]  
48  
49  
50  
51  
52 74. Gittelsohn A, Powe NR. Small area variations in health care delivery in Maryland. *Health*  
53 *Serv Res* 1995;30(2):295-317. [published Online First: 1995/06/01]  
54  
55  
56  
57  
58  
59  
60



- 1  
2  
3 75. Gomes UA, Silva AA, Bettiol H, et al. Risk factors for the increasing caesarean section  
4 rate in Southeast Brazil: a comparison of two birth cohorts, 1978-1979 and 1994. *Int J*  
5 *Epidemiol* 1999;28(4):687-94. [published Online First: 1999/09/10]  
6  
7  
8  
9  
10 76. Gonzalez-Perez GJ, Vega-Lopez MG, Cabrera-Pivaral C, et al. Caesarean sections in  
11 Mexico: are there too many? *Health Policy Plan* 2001;16(1):62-7.  
12  
13  
14  
15 77. Goyert GL, Bottoms SF, Treadwell MC, et al. The physician factor in cesarean birth  
16 rates. *N Engl J Med* 1989;320(11):706-9. doi: 10.1056/NEJM198903163201106 [doi]  
17 [published Online First: 1989/03/16]  
18  
19  
20  
21 78. Gregory KD, Korst LM, Platt LD. Variation in elective primary cesarean delivery by  
22 patient and hospital factors. *Am J Obstet Gynecol* 2001;184(7):1521-32; discussion  
23 32-4. doi: S0002937801947568 [pii] [published Online First: 2001/06/16]  
24  
25  
26  
27  
28 79. Gross MM, Mattered A, Berlage S, et al. Interinstitutional variations in mode of birth  
29 after a previous caesarean section: a cross-sectional study in six German hospitals.  
30 *Journal of perinatal medicine* 2015;43(2):177-84. doi: 10.1515/jpm-2014-0108  
31 [published Online First: 2014/11/15]  
32  
33  
34  
35  
36  
37 80. Grytten J, Monkerud L, Hagen TP, et al. The impact of hospital revenue on the increase  
38 in Caesarean sections in Norway. A panel data analysis of hospitals 1976-2005. *BMC*  
39 *health services research* 2011;11:267. doi: 10.1186/1472-6963-11-267 [published  
40 Online First: 2011/10/14]  
41  
42  
43  
44  
45  
46 81. Grytten J, Monkerud L, Sorensen R. Adoption of diagnostic technology and variation in  
47 caesarean section rates: a test of the practice style hypothesis in Norway. *Health Serv*  
48 *Res* 2012;47(6):2169-89. doi: 10.1111/j.1475-6773.2012.01419.x [doi] [published  
49 Online First: 2012/05/19]  
50  
51  
52  
53  
54  
55 82. Gumede S, Black V, Naidoo N, et al. Attendance at antenatal clinics in inner-city  
56 Johannesburg, South Africa and its associations with birth outcomes: analysis of data  
57  
58  
59  
60

- 1  
2  
3 from birth registers at three facilities. *BMC public health* 2017;17(Suppl 3):443. doi:  
4 10.1186/s12889-017-4347-z [published Online First: 2017/08/24]  
5  
6  
7  
8 83. Hanley GE, Janssen PA, Greyson D. Regional variation in the cesarean delivery and  
9 assisted vaginal delivery rates. *Obstet Gynecol* 2010;115(6):1201-8. doi:  
10 10.1097/AOG.0b013e3181dd918c [doi]  
11  
12 00006250-201006000-00016 [pii] [published Online First: 2010/05/27]  
13  
14  
15  
16  
17 84. Haraldsdottir S, Gudmundsson S, Bjarnadottir RI, et al. Maternal geographic residence,  
18 local health service supply and birth outcomes. *Acta Obstet Gynecol Scand*  
19 2015;94(2):156-64. doi: 10.1111/aogs.12534 [published Online First: 2014/10/31]  
20  
21  
22  
23  
24 85. Heffner LJ, Elkin E, Fretts RC. Impact of labor induction, gestational age, and maternal  
25 age on cesarean delivery rates. *Obstet Gynecol* 2003;102(2):287-93. [published  
26 Online First: 2003/08/09]  
27  
28  
29  
30  
31 86. Helfand M, Zimmer-Gembeck MJ. Practice variation and the risk of low birth weight in a  
32 public prenatal care program. *Med Care* 1997;35(1):16-31. [published Online First:  
33 1997/01/01]  
34  
35  
36  
37  
38 87. Henke RM, Wier LM, Marder WD, et al. Geographic variation in cesarean delivery in the  
39 United States by payer. *BMC Pregnancy Childbirth* 2014;14:387. doi:  
40 10.1186/s12884-014-0387-x [published Online First: 2014/11/20]  
41  
42  
43  
44  
45 88. Hopkins K, Lima Amaral EF, Mourão ANM. The Impact of Payment Source and  
46 Hospital Type on Rising Cesarean Section Rates in Brazil, 1998 to 2008. *Birth: Issues*  
47 *in Perinatal Care* 2014;41(2):169-77. doi: 10.1111/birt.12106  
48  
49  
50  
51  
52 89. Hsu KH, Liao PJ, Hwang CJ. Factors affecting Taiwanese women's choice of Cesarean  
53 section. *Social Science & Medicine* 2008;66(1):201-09.  
54  
55  
56  
57  
58  
59  
60

- 1  
2  
3 90. Hueston WJ, Lewis-Stevenson S. Provider distribution and variations in statewide  
4 cesarean section rates. *J Community Health* 2001;26(1):1-10. [published Online First:  
5 2001/04/12]  
6  
7  
8  
9  
10 91. Jessee WF, Nickerson CW, Grant WS. Assessing medical practices through PSRO  
11 cooperative studies, an evaluation of Cesarean births in nine PSRO areas. *Med Care*  
12 1982;20(1):75-84. [published Online First: 1982/01/01]  
13  
14  
15  
16  
17 92. Johnson N, Ansell D. Variation in caesarean and instrumental delivery rates in New  
18 Zealand hospitals. *Aust N Z J Obstet Gynaecol* 1995;35(1):6-11. [published Online  
19 First: 1995/02/01]  
20  
21  
22  
23  
24 93. Joyce R, Webb R, Peacock J. Predictors of obstetric intervention rates: Case-mix, staffing  
25 levels and organisational factors of hospital of birth. *Journal of Obstetrics and*  
26 *Gynaecology* 2002;22(6):618-25.  
27  
28  
29  
30  
31 94. Keskimaki I, Aro S, Teperi J. Regional variation in surgical procedure rates in Finland.  
32 *Scand J Soc Med* 1994;22(2):132-8. [published Online First: 1994/06/01]  
33  
34  
35  
36 95. Khan MN, Islam MM, Shariff AA, et al. Socio-demographic predictors and average  
37 annual rates of caesarean section in Bangladesh between 2004 and 2014. *PLoS ONE*  
38 2017;12 (5) (no pagination)(e0177579)  
39  
40  
41  
42 96. Kim SJ, Han K-T, Kim SJ, et al. Impact of a diagnosis-related group payment system on  
43 cesarean section in Korea. *Health Policy* 2016;120(6):596-603. doi:  
44 10.1016/j.healthpol.2016.04.018  
45  
46  
47  
48  
49 97. Kim YM, Kim SY. Factors on the Gap between Predicted Cesarean Section Rate and  
50 Real Cesarean Section Rate in Tertiary Hospitals. *Korean Journal of Women Health*  
51 *Nursing* 2012;18(3):200-08. doi: 10.4069/kjwhn.2012.18.3.200  
52  
53  
54  
55  
56  
57  
58  
59  
60

- 1  
2  
3 98. Kimsey L, Olaiya S, Smith C, et al. Geographic variation within the military health  
4 system. *BMC health services research* 2017;17(1):271. doi: 10.1186/s12913-017-  
5 2216-1 [published Online First: 2017/04/15]  
6  
7  
8  
9  
10 99. Klassen DF. Cesarean section rates: time trends and comparisons among hospital sizes,  
11 census regions, and teaching and nonteaching hospitals. *PAS Reporter* 1975;13(19)  
12  
13  
14 100. Klemetti R, Che X, Gao Y, et al. Cesarean section delivery among primiparous women  
15 in rural China: an emerging epidemic. *American Journal of Obstetrics & Gynecology*  
16 2010;202(1):65.e1-6. doi: 10.1016/j.ajog.2009.08.032  
17  
18  
19  
20  
21 101. Koroukian SM, Bush D, Rimm AA. Comparison of cesarean section rates in fee-for-  
22 service versus managed care patients in the Ohio Medicaid population, 1992-1997.  
23 *The American journal of managed care* 2001;7(2):134-42. [published Online First:  
24 2001/02/24]  
25  
26  
27  
28  
29  
30 102. Korst LM, Gornbein JA, Gregory KD. Rethinking the cesarean rate: how pregnancy  
31 complications may affect interhospital comparisons. *Med Care* 2005;43(3):237-45.  
32  
33  
34  
35 103. Kozhimannil KB, Arcaya MC, Subramanian SV. Maternal clinical diagnoses and  
36 hospital variation in the risk of cesarean delivery: analyses of a National US Hospital  
37 Discharge Database. *PLoS medicine* 2014;11(10):e1001745. doi:  
38 10.1371/journal.pmed.1001745 [published Online First: 2014/10/22]  
39  
40  
41  
42  
43  
44 104. Kyu-Tae H, Seung Ju K, Yeong Jun J, et al. Do hospital characteristics influence  
45 Cesarean delivery? Analysis of National Health Insurance claim data. *European*  
46 *Journal of Public Health* 2017;27(5):801-07. doi: 10.1093/eurpub/ckx061  
47  
48  
49  
50  
51 105. Lee K, Lee S. Effects of the DRG-based prospective payment system operated by the  
52 voluntarily participating providers on the cesarean section rates in Korea. *Health*  
53 *Policy* 2007;81(2/3):300-08.  
54  
55  
56  
57  
58  
59  
60

- 1  
2  
3 106. Lee YY, Roberts CL, Patterson JA. Unexplained variation in hospital caesarean section  
4 rates. *The Medical journal of Australia* 2014;200(2):84-5. [published Online First:  
5 2014/02/04]  
6  
7  
8  
9
- 10 107. Leung GM, Lam TH, Thach TQ, et al. Rates of cesarean births in Hong Kong: 1987-  
11 1999. *Birth (Berkeley, Calif)* 2001;28(3):166-72.  
12  
13
- 14 108. Li HT, Luo S, Trasande L, et al. Geographic Variations and Temporal Trends in  
15 Cesarean Delivery Rates in China, 2008-2014. *Jama* 2017;317(1):69-76. doi:  
16 10.1001/jama.2016.18663 [published Online First: 2016/12/29]  
17  
18  
19
- 20 109. Librero J, Peiro S, Calderon SM. Inter-hospital variations in caesarean sections. A risk  
21 adjusted comparison in the Valencia public hospitals. *J Epidemiol Community Health*  
22 2000;54(8):631-6. [published Online First: 2000/07/13]  
23  
24  
25  
26  
27
- 28 110. Lidegaard O, Jensen LM, Weber T. Technology use, cesarean section rates, and  
29 perinatal mortality at Danish maternity wards. *Acta Obstet Gynecol Scand*  
30 1994;73(3):240-5. [published Online First: 1994/03/01]  
31  
32  
33
- 34 111. Little SE, Orav EJ, Robinson JN, et al. The relationship between variations in cesarean  
35 delivery and regional health care use in the United States. *Am J Obstet Gynecol* 2015  
36 doi: 10.1016/j.ajog.2015.12.023 [published Online First: 2016/01/02]  
37  
38  
39  
40
- 41 112. Liu T, Chen C, Tsai Y, et al. Taiwan's high rate of cesarean births: impacts of national  
42 health insurance and fetal gender preference. *Birth: Issues in Perinatal Care*  
43 2007;34(2):115-22.  
44  
45  
46  
47  
48
- 49 113. Localio AR, Lawthers AG, Bengtson JM, et al. Relationship between malpractice claims  
50 and cesarean delivery. *JAMA* 1993;269(3):366-73. [published Online First:  
51 1993/01/20]  
52  
53  
54  
55
- 56 114. Lundsberg LS, Illuzzi JL, Garipey AM, et al. Variation in Hospital Intrapartum Practices  
57 and Association With Cesarean Rate. *Journal of obstetric, gynecologic, and neonatal*  
58  
59  
60

- 1  
2  
3       *nursing* : *JOGNN* 2017;46(1):5-17. doi: 10.1016/j.jogn.2016.07.011 [published  
4  
5       Online First: 2016/11/26]  
6  
7  
8 115. Lutomski JE, Morrison JJ, Lydon-Rochelle MT. Regional variation in obstetrical  
9  
10       intervention for hospital birth in the Republic of Ireland, 2005-2009. *BMC Pregnancy*  
11       *Childbirth*;12:123. doi: 1471-2393-12-123 [pii]  
12  
13  
14  
15       10.1186/1471-2393-12-123 [doi] [published Online First: 2012/11/07]  
16  
17  
18 116. Lutomski JE, Murphy M, Devane D, et al. Private health care coverage and increased  
19  
20       risk of obstetric intervention. *BMC Pregnancy Childbirth* 2014;14:13. doi:  
21       10.1186/1471-2393-14-13 [published Online First: 2014/01/15]  
22  
23  
24  
25 117. Maeda E, Ishihara O, Tomio J, et al. Cesarean section rates and local resources for  
26  
27       perinatal care in Japan: A nationwide ecological study using the national database of  
28       health insurance claims. *Journal of Obstetrics & Gynaecology Research*  
29       2018;44(2):208-16. doi: 10.1111/jog.13518  
30  
31  
32  
33  
34 118. Marquez-Calderon S, Ruiz-Ramos M, Juarez S, et al. Caesarean delivery in Andalusia,  
35  
36       Spain. Relationship with social, clinical and health services factors (2007-2009).  
37       [Spanish]  
38  
39  
40  
41       Frecuencia de la Cesarea en Andalucia. Relacion con factores sociales, clinicos y de los  
42       servicion saniarios (2007-2009). *Revista Espanola de Salud Publica* 2011;85(2):205-  
43       15.  
44  
45  
46  
47  
48 119. McKenzie L, Stephenson PA. Variation in cesarean section rates among hospitals in  
49  
50       Washington State. *Am J Public Health* 1993;83(8):1109-12. [published Online First:  
51       1993/08/01]  
52  
53  
54  
55 120. Menard MK. Cesarean delivery rates in the United States. The 1990s. *Obstet Gynecol*  
56       *Clin North Am* 1999;26(2):275-86. [published Online First: 1999/07/10]  
57  
58  
59  
60

- 1  
2  
3 121. Mendlovic J, Gordon ES, Haklai Z, et al. Geographic variation in selected hospital  
4  
5 procedures and services in the Israeli health care system. *Israel Journal of Health*  
6  
7 *Policy Research* 2017;6 (1) (no pagination)(4)  
8  
9
- 10 122. Mesterton J, Ladfors L, Ekenberg Abreu A, et al. Case mix adjusted variation in  
11  
12 cesarean section rate in Sweden. *Acta Obstet Gynecol Scand* 2017;96(5):597-606. doi:  
13  
14 10.1111/aogs.13117 [published Online First: 2017/02/22]  
15  
16
- 17 123. Mikolajczyk RT, Schmedt N, Zhang J, et al. Regional variation in caesarean deliveries  
18  
19 in Germany and its causes. *BMC Pregnancy Childbirth* 2013;13:99. doi: 1471-2393-  
20  
21 13-99 [pii]  
22  
23  
24 10.1186/1471-2393-13-99 [doi] [published Online First: 2013/05/03]  
25  
26
- 27 124. Mindell WR, Vayda E, Cardillo B. Ten-year trends in Canada for selected operations.  
28  
29 *Can Med Assoc J* 1982;127(1):23-7. [published Online First: 1982/07/01]  
30  
31
- 32 125. Misra A. Impact of the HealthChoice program on cesarean section and vaginal birth  
33  
34 after C-section deliveries: a retrospective analysis. *Matern Child Health J*  
35  
36 2008;12(2):266-74. doi: 10.1007/s10995-007-0234-z  
37  
38
- 39 126. Mitler LK, Rizzo JA, Horwitz SM. Physician gender and cesarean sections. *J Clin*  
40  
41 *Epidemiol* 2000;53(10):1030-5. doi: S0895-4356(00)00221-3 [pii] [published Online  
42  
43 First: 2000/10/12]  
44  
45
- 46 127. Mossialos E, Allin S, Karras K, et al. An investigation of Caesarean sections in three  
47  
48 Greek hospitals: the impact of financial incentives and convenience. *Eur J Public*  
49  
50 *Health* 2005;15(3):288-95. doi: 10.1093/eurpub/cki002  
51  
52
- 53 128. Movsas TZ, Wells E, Mongoven A, et al. Does medical insurance type (private vs  
54  
55 public) influence the physician's decision to perform Caesarean delivery? *J Med*  
56  
57 *Ethics* 2012;38(8):470-3. doi: 10.1136/medethics-2011-100209  
58  
59  
60

- 1  
2  
3 129. Murray SF. Relation between private health insurance and high rates of caesarean  
4 section in Chile: qualitative and quantitative study. *BMJ: British Medical Journal*  
5  
6 (International Edition) 2000;321(7275):1501-05. doi: 10.1136/bmj.321.7275.1501  
7  
8  
9
- 10 130. Murray SF, Pradenas FS. Cesarean birth trends in Chile, 1986 to 1994. *Birth: Issues in*  
11  
12 *Perinatal Care* 1997;24(4):258-63.  
13  
14
- 15 131. Naiditch M, Levy G, Chale JJ, et al. [Cesarean sections in France: impact of  
16  
17 organizational factors on different utilization rates]. *J Gynecol Obstet Biol Reprod*  
18  
19 (Paris) 1997;26(5):484-95. [published Online First: 1997/01/01]  
20  
21
- 22 132. Newton ER, Higgins CS. Factors associated with hospital-specific cesarean birth rates. *J*  
23  
24 *Reprod Med* 1989;34(6):407-11. [published Online First: 1989/06/01]  
25  
26
- 27 133. Nicholson WK, Witter F, Powe NR. Effect of hospital setting and volume on clinical  
28  
29 outcomes in women with gestational and type 2 diabetes mellitus. *J Womens Health*  
30  
31 (Larchmt) 2009;18(10):1567-76. doi: 10.1089/jwh.2008.1114 [doi] [published Online  
32  
33 First: 2009/09/22]  
34  
35
- 36 134. Nigam A. The effects of institutional change on geographic variation and health services  
37  
38 use in the U.S.A. *Soc Sci Med* 2011;74(3):323-31. doi: S0277-9536(11)00480-1 [pii]  
39  
40 10.1016/j.socscimed.2011.07.017 [doi] [published Online First: 2011/09/17]  
41  
42
- 43 135. Nilsen C, Ostbye T, Daltveit AK, et al. Trends in and socio-demographic factors  
44  
45 associated with caesarean section at a Tanzanian referral hospital, 2000 to 2013.  
46  
47 *International journal for equity in health* 2014;13:87.  
48  
49
- 50 136. Oleske DM, Glandon GL, Giacomelli GJ, et al. The cesarean birth rate: influence of  
51  
52 hospital teaching status. *Health Serv Res* 1991;26(3):325-37. [published Online First:  
53  
54 1991/08/01]  
55  
56  
57  
58  
59  
60



- 1  
2  
3 137. Ono T, Matsuda Y, Sasaki K, et al. Comparative analysis of cesarean section rates using  
4 Robson Ten-Group Classification System and Lorenz curve in the main institutions in  
5 Japan. *Journal of Obstetrics and Gynaecology Research* 2016;42(10):1279-85.  
6  
7  
8  
9  
10 138. Paranjothy S, Frost C, Thomas J. How much variation in CS rates can be explained by  
11 case mix differences? *BJOG* 2005;112(5):658-66. doi: BJO00501 [pii]  
12  
13 10.1111/j.1471-0528.2005.00501.x [doi] [published Online First: 2005/04/22]  
14  
15 139. Parazzini F, Cipriani S, Bulfoni G, et al. Mode of delivery and level of neonatal care in  
16 Lombardy: A descriptive analysis according to volume of care Neonatology and Fetal  
17 Medicine. *Italian Journal of Pediatrics* 2015;41(1)  
18  
19  
20 140. Placek PJ, Taffel SM. Trends in cesarean section rates for the United States, 1970--78.  
21 *Public Health Rep* 1980;95(6):540-8. [published Online First: 1980/11/01]  
22  
23  
24 141. Rabilloud M, Ecochard R, Guilhot J, et al. Study of the variations of the cesarean  
25 sections rate in the Rhone-Alpes region (France): effect of women and maternity  
26 service characteristics. *Eur J Obstet Gynecol Reprod Biol* 1998;78(1):11-7. doi:  
27 S0301211597002777 [pii] [published Online First: 1998/05/30]  
28  
29  
30 142. Raifman S, Cunha AJ, Castro MC. Factors associated with high rates of caesarean  
31 section in Brazil between 1991 and 2006. *Acta paediatrica (Oslo, Norway : 1992)*  
32 2014;103(7):e295-e99.  
33  
34  
35 143. Rattner D. [On the hypothesis of cesarean birth rate stabilization in southeastern, Brazil].  
36 *Rev Saude Publica* 1996;30(1):19-33. [published Online First: 1996/02/01]  
37  
38  
39 144. Ravindran J. Rising caesarean section rates in public hospitals in Malaysia 2006.  
40 *Medical Journal of Malaysia* 2008;63(5):434-35.  
41  
42  
43  
44 145. Renzi C, Sorge C, Fusco D, et al. Reporting of quality indicators and improvement in  
45 hospital performance: the P.Re.Val.E. Regional Outcome Evaluation Program. *Health*  
46  
47  
48  
49  
50  
51  
52  
53  
54  
55  
56  
57  
58  
59  
60

- 1  
2  
3 *Serv Res* 2012;47(5):1880-901. doi: 10.1111/j.1475-6773.2012.01401.x [doi]  
4  
5 [published Online First: 2012/09/19]  
6  
7
- 8 146. Ribeiro VS, Figueiredo FP, Silva AA, et al. Why are the rates of cesarean section in  
9  
10 Brazil higher in more developed cities than in less developed ones? *Braz J Med Biol*  
11  
12 *Res* 2007;40(9):1211-20. doi: S0100-879X2006005000130 [pii] [published Online  
13  
14 First: 2007/08/24]  
15  
16
- 17 147. Riddell CA, Hutcheon JA, Strumpf EC, et al. Inter-Institutional Variation in Use of  
18  
19 Caesarean Delivery for Labour Dystocia. *J Obstet Gynaecol Can* 2017 doi:  
20  
21 10.1016/j.jogc.2017.05.003 [published Online First: 2017/09/17]  
22  
23
- 24 148. Roohan PJ, Josberger RE, Gesten FC. Risk-adjusted primary cesarean delivery rates for  
25  
26 managed care plans in New York State, 1998. *Maternal & Child Health Journal*  
27  
28 2001;5(3):169-77.  
29  
30
- 31 149. Rossignol M, Moutquin JM, Boughrassa F, et al. Preventable obstetrical interventions:  
32  
33 how many caesarean sections can be prevented in Canada? *J Obstet Gynaecol Can*  
34  
35 2013;35(5):434-43. [published Online First: 2013/06/13]  
36  
37
- 38 150. Rowe RE, Townend J, Brocklehurst P, et al. Service configuration, unit characteristics  
39  
40 and variation in intervention rates in a national sample of obstetric units in England:  
41  
42 an exploratory analysis. *BMJ open* 2014;4(5):e005551. doi: 10.1136/bmjopen-2014-  
43  
44 005551 [published Online First: 2014/05/31]  
45  
46
- 47 151. Sarria Santamera A, Sendra Gutierrez JM. [Evolution of cesarean section rates in Spain:  
48  
49 1984-1988]. *Gac Sanit* 1994;8(44):209-14. [published Online First: 1994/09/01]  
50  
51
- 52 152. Schemann K, Patterson J, Nippita TA, et al. Variation in and factors associated with  
53  
54 timing of low risk, pre-labour repeat caesarean sections in NSW, 2008-2011. *Public*  
55  
56 *health research & practice* 2016;26(1) doi: 10.17061/phrp2611608 [published Online  
57  
58 First: 2016/02/11]  
59  
60

- 1  
2  
3 153. Schemann K, Patterson JA, Nippita TA, et al. Variation in hospital caesarean section  
4 rates for women with at least one previous caesarean section: a population based  
5 cohort study. *BMC Pregnancy Childbirth* 2015;15:179. doi: 10.1186/s12884-015-  
6 0609-x [published Online First: 2015/08/20]  
7  
8  
9  
10  
11  
12 154. Sentell T, Chang A, Ahn HJ, et al. Maternal language and adverse birth outcomes in a  
13 statewide analysis. *Women Health* 2016;56(3):257-80. doi:  
14 10.1080/03630242.2015.1088114  
15  
16  
17  
18 155. Shiono PH, Fielden JG, McNellis D, et al. Recent trends in cesarean birth and trial of  
19 labor rates in the United States. *JAMA* 1987;257(4):494-7. [published Online First:  
20 1987/01/23]  
21  
22  
23  
24  
25 156. Shorten A, Shorten B. What happens when a private hospital comes to town? The  
26 impact of the 'public' to 'private' hospital shift on regional birthing outcomes. *Women  
27 & Birth* 2007;20(2):49-55.  
28  
29  
30  
31  
32 157. Signorelli C, Elliott P, Cattaruzza MS, et al. Trend of caesarean section in Italy: an  
33 examination of national data 1980-1985. *Int J Epidemiol* 1991;20(3):712-6.  
34 [published Online First: 1991/09/01]  
35  
36  
37  
38 158. Snyder CC, Wolfe KB, Loftin RW, et al. The influence of hospital type on induction of  
39 labor and mode of delivery. *Am J Obstet Gynecol* 2011;205(4):346 e1-4. doi:  
40 10.1016/j.ajog.2011.05.004 [published Online First: 2011/06/28]  
41  
42  
43  
44 159. Souza JP, Betran AP, Dumont A, et al. A global reference for caesarean section rates (C-  
45 Model): a multicountry cross-sectional study. *BJOG: An International Journal of  
46 Obstetrics & Gynaecology* 2016;123(3):427-36. doi: 10.1111/1471-0528.13509  
47  
48  
49  
50  
51 160. Sufang G, Padmadas SS, Fengmin Z, et al. Delivery settings and caesarean section rates  
52 in China. *Bull World Health Organ* 2007;85(10):755-62. doi: S0042-  
53 96862007001000011 [pii] [published Online First: 2007/11/27]  
54  
55  
56  
57  
58  
59  
60

- 1  
2  
3 161. Tang C, Wu M, Liu J, et al. Delayed parenthood and the risk of cesarean delivery -- is  
4 paternal age an independent risk factor? *Birth: Issues in Perinatal Care*  
5  
6 2006;33(1):18-26.  
7  
8  
9  
10 162. Tang S, Li X, Wu Z. Rising cesarean delivery rate in primiparous women in urban  
11  
12 China: evidence from three nationwide household health surveys. *American Journal*  
13  
14 *of Obstetrics & Gynecology* 2006;195(6):1527-32.  
15  
16  
17 163. Tracy SK, Sullivan E, Dahlen H, et al. Does size matter? A population-based study of  
18  
19 birth in lower volume maternity hospitals for low risk women. *BJOG* 2006;113(1):86-  
20  
21 96. doi: 10.1111/j.1471-0528.2005.00794.x [published Online First: 2006/01/10]  
22  
23  
24 164. Tucker J, McVicar A, Pitchforth E, et al. Maternity care models in a remote and rural  
25  
26 network: assessing clinical appropriateness and outcome indicators. *Qual Saf Health*  
27  
28 *Care*;19(2):83-9. doi: 19/2/83 [pii]  
29  
30  
31 10.1136/qshc.2008.028894 [doi] [published Online First: 2010/03/31]  
32  
33  
34 165. Tussing AD, Wojtowycz MA. Health maintenance organizations, independent practice  
35  
36 associations, and cesarean section rates. *Health Serv Res* 1994;29(1):75-93.  
37  
38 [published Online First: 1994/04/01]  
39  
40  
41 166. Vadnais MA, Hacker MR, Shah NT, et al. Quality Improvement Initiatives Lead to  
42  
43 Reduction in Nulliparous Term Singleton Vertex Cesarean Delivery Rate. *Joint*  
44  
45 *Commission journal on quality and patient safety* 2017;43(2):53-61. doi:  
46  
47 10.1016/j.jcjq.2016.11.008 [published Online First: 2017/03/24]  
48  
49  
50 167. Vankan E, Schoorel EN, van Kuijk SM, et al. Practice variation of vaginal birth after  
51  
52 cesarean and the influence of risk factors at patient level: a retrospective cohort study.  
53  
54 *Acta Obstet Gynecol Scand* 2017;96(2):158-65. doi: 10.1111/aogs.13059 [published  
55  
56 Online First: 2016/11/20]  
57  
58  
59  
60

- 1  
2  
3 168. Vayda E, Barnsley JM, Mindell WR, et al. Five-year study of surgical rates in Ontario's  
4 counties. *Can Med Assoc J* 1984;131(2):111-5. [published Online First: 1984/07/15]  
5  
6  
7 169. Vecino-Ortiz AI, Bardey D, Castano-Yepes RA. Multilevel analysis to measure hospital  
8 variation: The case of cesarean delivery. *Value in Health*;14 (3):A113.  
9  
10  
11 170. Wang X, Hellerstein S, Hou L, et al. Caesarean deliveries in China. *BMC Pregnancy*  
12 *Childbirth* 2017;17(1):54. doi: 10.1186/s12884-017-1233-8 [published Online First:  
13 2017/02/09]  
14  
15  
16  
17 171. Woolbright LA. Why is the cesarean delivery rate so high in Alabama? An examination  
18 of risk factors, 1991-1993. *Birth: Issues in Perinatal Care* 1996;23(1):20-25.  
19  
20  
21  
22 172. Xing Lin F, Ling X, Yan G, et al. Factors influencing rising caesarean section rates in  
23 China between 1988 and 2008. *Bulletin of the World Health Organization*  
24 2012;90(1):30-39A. doi: 10.2471/BLT.11.090399  
25  
26  
27  
28 173. Xirasagar S, Lin H. Cost convergence between public and for-profit hospitals under  
29 prospective payment and high competition in Taiwan. *Health Services Research*  
30 2004;39(6p2):2101-15.  
31  
32  
33  
34 174. Xirasagar S, Lin HC. Maternal request CS--role of hospital teaching status and for-profit  
35 ownership. *Eur J Obstet Gynecol Reprod Biol* 2007;132(1):27-34. doi:  
36 10.1016/j.ejogrb.2006.05.022  
37  
38  
39 175. Xirasagar S, Lin HC, Liu TC. Do group practices have lower caesarean rates than solo  
40 practice obstetric clinics? Evidence from Taiwan. *Health Policy Plan* 2006;21(4):319-  
41 25. doi: 21/4/319 [pii]  
42  
43  
44 10.1093/heapol/czl015 [doi] [published Online First: 2006/06/23]  
45  
46  
47 176. Yang H-J, Kao F-Y, Chou Y-J, et al. Do Nurses Have Worse Pregnancy Outcomes Than  
48 Non-Nurses? *Birth: Issues in Perinatal Care* 2014;41(3):262-67. doi:  
49 10.1111/birt.12118  
50  
51  
52  
53  
54  
55  
56  
57  
58  
59  
60

- 1  
2  
3 177. Yi-Chen H, Chinhung Linn G. Financial Incentives and Use of Cesarean Delivery:  
4  
5 Taiwan Birth Data 2003 to 2007. *American Journal of Managed Care*  
6  
7 2012;18(1):e35-41.  
8  
9
- 10 178. Zdeb MS, Therriault GD, Logrillo VM. Cesarean sections in upstate New York, 1968-  
11  
12 1978. *Am J Epidemiol* 1980;112(3):395-403. [published Online First: 1980/09/01]  
13  
14
- 15 179. Zere E, Tumusiime P, Walker O, et al. Inequities in utilization of maternal health  
16  
17 interventions in Namibia: implications for progress towards MDG 5 targets. *Int J*  
18  
19 *Equity Health* 2010;9:16. doi: 1475-9276-9-16 [pii]  
20  
21  
22 10.1186/1475-9276-9-16 [doi] [published Online First: 2010/06/15]  
23  
24
- 25 180. Zhang S, Cardarelli K, Shim R, et al. Racial Disparities in Economic and Clinical  
26  
27 Outcomes of Pregnancy Among Medicaid Recipients. *Maternal & Child Health*  
28  
29 *Journal* 2013;17(8):1518-25. doi: 10.1007/s10995-012-1162-0  
30  
31
- 32 181. Zwecker P, Azoulay L, Abenheim HA. Effect of Fear of Litigation on Obstetric Care: A  
33  
34 Nationwide Analysis on Obstetric Practice. *American Journal of Perinatology*  
35  
36 2011;28(1):1-7. doi: 10.1055/s-0030-1271213  
37  
38
- 39 182. Brown HC, Paranjothy S, Dowswell T, et al. Package of care for active management in  
40  
41 labour for reducing caesarean section rates in low-risk women. *The Cochrane*  
42  
43 *database of systematic reviews* 2013;9:CD004907. doi:  
44  
45 10.1002/14651858.CD004907.pub3 [published Online First: 2013/09/18]  
46  
47
- 48 183. Chauhan SP, Klauser CK, Woodring TC, et al. Intrapartum nonreassuring fetal heart rate  
49  
50 tracing and prediction of adverse outcomes: interobserver variability. *Am J Obstet*  
51  
52 *Gynecol* 2008;199(6):623 e1-5. doi: S0002-9378(08)00638-8 [pii]  
53  
54  
55 10.1016/j.ajog.2008.06.027 [doi] [published Online First: 2008/08/01]  
56  
57  
58  
59  
60

- 1  
2  
3 184. Chen PC, Yang MC, Chiang TL, et al. A study of cross-region admission and the  
4  
5 distribution of regional inpatient care resources. [Chinese]. *Taiwan Journal of Public*  
6  
7 *Health* 2003;22(1):27-32.  
8  
9
- 10 185. Cheng Y, Carpenter A, Main E. Large hospital-level variation in cesarean delivery rates  
11  
12 during induction of labor. *American Journal of Obstetrics and Gynecology*  
13  
14 2015;1):S384.  
15  
16
- 17 186. Cisse CT, Faye EO, de Bernis L, et al. [Cesarean sections in Senegal: coverage of needs  
18  
19 and quality of services]. *Sante* 1998;8(5):369-77. [published Online First: 1998/12/16]  
20  
21
- 22 187. Cressie N. Regional mapping of incidence rates using spatial Bayesian models. *Med*  
23  
24 *Care* 1993;31(5 Suppl):YS60-5. [published Online First: 1993/05/01]  
25  
26
- 27 188. da Silva AA, Bettiol H, Barbieri MA, et al. Infant mortality and low birth weight in  
28  
29 cities of Northeastern and Southeastern Brazil. *Rev Saude Publica* 2003;37(6):693-8.  
30  
31 doi: S0034-89102003000600002 [pii] [published Online First: 2003/12/11]  
32  
33
- 34 189. Danishevski K, McKee M, Sassi F, et al. The decision to perform Caesarean section in  
35  
36 Russia. *Int J Qual Health Care* 2008;20(2):88-94. doi: mzm070 [pii]  
37  
38 10.1093/intqhc/mzm070 [doi] [published Online First: 2007/12/26]  
39  
40
- 41 190. Dimitrov A. [Pro and con the trend to an increasing frequency of cesarean sections].  
42  
43 *Akush Ginekol (Sofia)* 1998;37(3):1-5. [published Online First: 1999/04/16]  
44  
45
- 46 191. Edmonds JK, Hawkins SS, Cohen BB. Variation in Vaginal Birth After Cesarean by  
47  
48 Maternal Race and Detailed Ethnicity. *Matern Child Health J* 2015 doi:  
49  
50 10.1007/s10995-015-1897-5 [published Online First: 2015/12/25]  
51  
52
- 53 192. Emmett CL, Montgomery AA, Murphy DJ. Preferences for mode of delivery after  
54  
55 previous caesarean section: what do women want, what do they get and how do they  
56  
57 value outcomes? *Health Expect* 2010;14(4):397-404. doi: 10.1111/j.1369-  
58  
59 7625.2010.00635.x [doi] [published Online First: 2010/09/24]  
60

- 1  
2  
3 193. Gama AS, Giffin KM, Angulo-Tuesta A, et al. Women's representations and experiences  
4 with vaginal and cesarean delivery in public and private maternity hospitals.  
5  
6 [Portuguese]  
7  
8  
9  
10 Representacoes e experiencias das mulheres sobre a assistencia ao parto vaginal e cesarea em  
11 maternidades publica e privada. *Cadernos de Saude Publica* 2009;25(11):2480-88.  
12  
13  
14  
15 194. Haupt BJ. Deliveries in short-stay hospitals: United States, 1980. *Adv Data* 1982(83):1-  
16 11. [published Online First: 1982/09/15]  
17  
18  
19  
20 195. Hofmeyr GJ, Kulier R, West Helen M. External cephalic version for breech presentation  
21 at term. *Cochrane Database of Systematic Reviews* 2015; (4).  
22  
23 <http://onlinelibrary.wiley.com/doi/10.1002/14651858.CD000083.pub3/abstract>.  
24  
25  
26  
27 196. Kennare R. Why is the caesarean section rate rising? *MIDIRS Midwifery Digest*  
28 2003;13(4):503-08.  
29  
30  
31  
32 197. Krivenko CA, Chodroff C. The analysis of clinical outcomes: getting started in  
33 benchmarking. *Jt Comm J Qual Improv* 1994;20(5):260-6. [published Online First:  
34 1994/05/01]  
35  
36  
37  
38 198. Nirupam S, Yuster EA. Emergency obstetric care: Measuring availability and  
39 monitoring progress. *International Journal of Gynecology and Obstetrics*  
40 1995;50(SUPPL. 2):S79-S88.  
41  
42  
43  
44  
45 199. Pel M, Heres MH, Hart AA, et al. Provider-associated factors in obstetric interventions.  
46 *Eur J Obstet Gynecol Reprod Biol* 1995;61(2):129-34. doi: 030121159502129U [pii]  
47 [published Online First: 1995/08/01]  
48  
49  
50  
51  
52 200. Phipps H, de Vries B, Hyett J, et al. Prophylactic manual rotation for fetal malposition to  
53 reduce operative delivery. *Cochrane Database of Systematic Reviews* 2014; (12).  
54  
55 <http://onlinelibrary.wiley.com/doi/10.1002/14651858.CD009298.pub2/abstract>.  
56  
57  
58  
59  
60



- 1  
2  
3 201. Ravindran J. Caesarean section rates in government hospitals in Malaysia, 2000-2001.  
4  
5 *Medical Journal of Malaysia* 2003;58(2):294-95.  
6  
7  
8 202. Rohrer JE. Small area analysis: descriptive epidemiology in health services research.  
9  
10 *Clin Perform Qual Health Care* 1993;1(1):35-42. [published Online First:  
11  
12 1992/12/09]  
13  
14  
15 203. Sandall J, Soltani H, Gates S, et al. Midwife-led continuity models versus other models  
16  
17 of care for childbearing women. *Cochrane Database of Systematic Reviews* 2013; (8).  
18  
19 <http://onlinelibrary.wiley.com/doi/10.1002/14651858.CD004667.pub3/abstract>.  
20  
21  
22 204. Singata M, Tranmer J, Gyte Gillian ML. Restricting oral fluid and food intake during  
23  
24 labour. *Cochrane Database of Systematic Reviews* 2013; (8).  
25  
26 <http://onlinelibrary.wiley.com/doi/10.1002/14651858.CD003930.pub3/abstract>.  
27  
28  
29 205. Ward L, Fenton K, Maher L. The high impact actions for nursing and midwifery. 7:  
30  
31 Promoting normal birth. *Nurs Times* 2010;106(33):16-7. [published Online First:  
32  
33 2010/09/25]  
34  
35  
36 206. Weber T. Cesarean section--why such variations in frequency?. [Danish]  
37  
38 Sectio caesarea--hvorför varierer hyppigheden? *Ugeskrift for læger* 1990;152(43):3143-44.  
39  
40  
41 207. Wei S, Wo Bi L, Qi H-P, et al. Early amniotomy and early oxytocin for prevention of, or  
42  
43 therapy for, delay in first stage spontaneous labour compared with routine care.  
44  
45 *Cochrane Database of Systematic Reviews* 2013; (8).  
46  
47 <http://onlinelibrary.wiley.com/doi/10.1002/14651858.CD006794.pub4/abstract>.  
48  
49  
50 208. Haas JS, Udvarhelyi S, Epstein AM. The effect of health coverage for uninsured  
51  
52 pregnant women on maternal health and the use of cesarean section. *JAMA*  
53  
54 1993;270(1):61-4.  
55  
56  
57 209. Braveman P, Egerter S, Edmonston F, et al. Racial/ethnic differences in the likelihood of  
58  
59 cesarean delivery, California. *American Journal of Public Health* 1995;85(5):625-30.  
60

- 1  
2  
3 210. Onion DK, Meyer DL, Wennberg DE, et al. Primary cesarean section rates in uninsured,  
4  
5 Medicaid and insured populations of predominantly rural northern New England.  
6  
7 *Journal of Rural Health* 1999;15(1):108-12.  
8  
9
- 10 211. Aron DC, Gordon HS, DiGiuseppe DL, et al. Variations in risk-adjusted cesarean  
11  
12 delivery rates according to race and health insurance. *Med Care* 2000;38(1):35-44.  
13  
14 [published Online First: 2000/01/12]  
15  
16
- 17 212. Huesch MD. Association between type of health insurance and elective cesarean  
18  
19 deliveries: New Jersey, 2004-2007. *Am J Public Health* 2011;101(11):e1-7. doi:  
20  
21 10.2105/AJPH.2011.300333  
22  
23
- 24 213. Huesch MD, Currid-Halkett E, Doctor JN. Measurement and risk adjustment of prelabor  
25  
26 cesarean rates in a large sample of California hospitals. *Am J Obstet Gynecol*  
27  
28 2014;210(5):443 e1-17. doi: 10.1016/j.ajog.2013.12.007 [published Online First:  
29  
30 2013/12/10]  
31  
32
- 33 214. Sebastiao YV, Womack L, Vamos CA, et al. Hospital variation in cesarean delivery  
34  
35 rates: contribution of individual and hospital factors in Florida. *Am J Obstet Gynecol*  
36  
37 2016;214(1):123 e1-23 e18. doi: 10.1016/j.ajog.2015.08.027 [published Online First:  
38  
39 2015/08/21]  
40  
41
- 42 215. Kozhimannil KB, Shippee TP, Adegoke O, et al. Trends in hospital-based childbirth  
43  
44 care: the role of health insurance. *The American journal of managed care*  
45  
46 2013;19(4):e125-32.  
47  
48
- 49 216. Hoxha I, Syrogiannouli L, Luta X, et al. Caesarean sections and for-profit status of  
50  
51 hospitals: systematic review and meta-analysis. *BMJ open* 2017;7(2):e013670. doi:  
52  
53 10.1136/bmjopen-2016-013670 [published Online First: 2017/02/19]  
54  
55
- 56 217. Barros PP. Cream-skimming, incentives for efficiency and payment system. *Journal of*  
57  
58 *Health Economics* 2003;22(3):419-43. doi: 10.1016/s0167-6296(02)00119-4  
59  
60

- 1  
2  
3 218. Halpern MT, Ward EM, Pavluck AL, et al. Association of insurance status and ethnicity  
4 with cancer stage at diagnosis for 12 cancer sites: a retrospective analysis. *The Lancet*  
5 *Oncology* 2008;9(3):222-31. doi: 10.1016/s1470-2045(08)70032-9 [published Online  
6 First: 2008/02/20]  
7  
8  
9  
10  
11  
12 219. Pezzi TA, Schwartz DL, Mohamed ASR, et al. Barriers to Combined-Modality Therapy  
13 for Limited-Stage Small-Cell Lung Cancer. *JAMA Oncol* 2018 doi:  
14 10.1001/jamaoncol.2017.4504  
15  
16  
17  
18  
19 220. Ayanian JZ, Kohler BA, Abe T, et al. The relation between health insurance coverage  
20 and clinical outcomes among women with breast cancer. *N Engl J Med*  
21 1993;329(5):326-31. doi: 10.1056/nejm199307293290507 [published Online First:  
22 1993/07/29]  
23  
24  
25  
26  
27  
28 221. Koh H, Tavenner M. Connecting to health insurance coverage. *JAMA*  
29 2013;309(18):1893-4. doi: 10.1001/jama.2013.3469  
30  
31  
32  
33 222. Decker SL, Kostova D, Kenney GM, et al. Health status, risk factors, and medical  
34 conditions among persons enrolled in Medicaid vs uninsured low-income adults  
35 potentially eligible for Medicaid under the Affordable Care Act. *JAMA*  
36 2013;309(24):2579-86. doi: 10.1001/jama.2013.7106  
37  
38  
39  
40  
41  
42 223. Decker SL, Kenney GM, Long SK. Characteristics of uninsured low-income adults in  
43 states expanding vs not expanding Medicaid. *JAMA Intern Med* 2014;174(6):988-9.  
44 doi: 10.1001/jamainternmed.2014.518  
45  
46  
47  
48  
49 224. Hellinger FJ. In Four ACA Expansion States, The Percentage Of Uninsured  
50 Hospitalizations For People With HIV Declined, 2012-14. *Health Aff (Millwood)*  
51 2015;34(12):2061-8. doi: 10.1377/hlthaff.2015.0718 [published Online First:  
52 2015/12/09]  
53  
54  
55  
56  
57  
58  
59  
60

- 1  
2  
3 225. Newton MF, Keirns CC, Cunningham R, et al. Uninsured adults presenting to US  
4 emergency departments: assumptions vs data. *Jama* 2008;300(16):1914-24. doi:  
5  
6 10.1001/jama.300.16.1914 [published Online First: 2008/10/23]  
7  
8  
9  
10 226. Shin JY, Yoon JK, Shin AK, et al. Association of Insurance and Community-Level  
11 Socioeconomic Status With Treatment and Outcome of Squamous Cell Carcinoma of  
12 the Pharynx. *JAMA Otolaryngol Head Neck Surg* 2017;143(9):899-907. doi:  
13  
14 10.1001/jamaoto.2017.0837  
15  
16  
17  
18 227. Ellis L, Canchola AJ, Spiegel D, et al. Trends in Cancer Survival by Health Insurance  
19 Status in California From 1997 to 2014. *JAMA Oncol* 2017 doi:  
20  
21 10.1001/jamaoncol.2017.3846  
22  
23  
24  
25 228. Xu T, Park A, Bai G, et al. Variation in Emergency Department vs Internal Medicine  
26 Excess Charges in the United States. *JAMA Intern Med* 2017;177(8):1139-45. doi:  
27  
28 10.1001/jamainternmed.2017.1598  
29  
30  
31  
32 229. Colvin JD, Hall M, Berry JG, et al. Financial Loss for Inpatient Care of Medicaid-  
33 Insured Children. *JAMA Pediatr* 2016;170(11):1055-62. doi:  
34  
35 10.1001/jamapediatrics.2016.1639  
36  
37  
38  
39 230. Dranove D, Garthwaite C, Ody C. Uncompensated Care Decreased At Hospitals In  
40 Medicaid Expansion States But Not At Hospitals In Nonexpansion States. *Health Aff*  
41 *(Millwood)* 2016;35(8):1471-9. doi: 10.1377/hlthaff.2015.1344  
42  
43  
44  
45  
46 231. Blavin F, Karpman M, Kenney GM, et al. Medicaid Versus Marketplace Coverage For  
47 Near-Poor Adults: Effects On Out-Of-Pocket Spending And Coverage. *Health Aff*  
48 *(Millwood)* 2018;37(2):299-307. doi: 10.1377/hlthaff.2017.1166  
49  
50  
51  
52  
53 232. Sommers BD, Gunja MZ, Finegold K, et al. Changes in Self-reported Insurance  
54 Coverage, Access to Care, and Health Under the Affordable Care Act. *JAMA*  
55  
56 2015;314(4):366-74. doi: 10.1001/jama.2015.8421  
57  
58  
59  
60

- 1  
2  
3 233. Jacobs PD, Duchovny N, Lipton BJ. Changes In Health Status And Care Use After ACA  
4  
5 Expansions Among The Insured And Uninsured. *Health Aff (Millwood)*  
6  
7 2016;35(7):1184-8. doi: 10.1377/hlthaff.2015.1539  
8  
9  
10 234. Mann C, Osius E. Medicaid's New Role in the Health Care System. *JAMA*  
11  
12 2015;314(4):343-4. doi: 10.1001/jama.2015.8433  
13  
14  
15 235. James BC, Savitz LA. How Intermountain trimmed health care costs through robust  
16  
17 quality improvement efforts. *Health Aff (Millwood)* 2011;30(6):1185-91. doi:  
18  
19 hlthaff.2011.0358 [pii]  
20  
21 10.1377/hlthaff.2011.0358 [doi] [published Online First: 2011/05/21]  
22  
23  
24 236. Brown JR, Sox HC, Goodman DC. Financial incentives to improve quality: skating to  
25  
26 the puck or avoiding the penalty box? *Jama* 2014;311(10):1009-10. doi:  
27  
28 10.1001/jama.2014.421 [published Online First: 2014/03/13]  
29  
30  
31  
32  
33  
34  
35  
36  
37  
38  
39  
40  
41  
42  
43  
44  
45  
46  
47  
48  
49  
50  
51  
52  
53  
54  
55  
56  
57  
58  
59  
60

**Table 1. Characteristics of included studies**

| <b>Author</b>   | <b>Year</b> | <b>State</b>  | <b>Study design</b>  | <b>Number of cases</b> | <b>Number of hospital units</b> | <b>Year of data collection</b> | <b>Population</b>                   | <b>Sampling</b> | <b>Type of CS analyzed</b> |
|-----------------|-------------|---------------|----------------------|------------------------|---------------------------------|--------------------------------|-------------------------------------|-----------------|----------------------------|
| Stafford        | 1990        | California    | Cross sectional      | 461066                 | Not reported                    | 1986                           | Primi- and multipara; any risk      | Consecutive     | Any                        |
| Haas et al. A   | 1993        | Massachusetts | Cross sectional      | 57257                  | Not reported                    | 1984                           | Primi- and multipara; any risk      | Consecutive     | Any                        |
| Haas et al. B   | 1993        | Massachusetts | Cross sectional      | 64346                  | Not reported                    | 1987                           | Primi- and multipara; any risk      | Consecutive     | Any                        |
| Braveman et al. | 1995        | California    | Retrospective cohort | 213761                 | Unclear                         | 1991                           | Primipara; no previous CS; any risk | Consecutive     | Any                        |
| Burns et al.    | 1995        | Arizona       | Cross sectional      | 33233                  | 36                              | 1989                           | Primi- and multipara; any risk      | Consecutive     | Any                        |

1  
2  
3  
4  
5  
6  
7  
8  
9  
10  
11  
12  
13  
14  
15  
16  
17  
18  
19  
20  
21  
22  
23  
24  
25  
26  
27  
28  
29  
30  
31  
32  
33  
34  
35  
36  
37  
38  
39  
40  
41  
42  
43  
44  
45  
46

|                                                                      |                   |      |                  |                         |        |                 |               |                                        |             |     |
|----------------------------------------------------------------------|-------------------|------|------------------|-------------------------|--------|-----------------|---------------|----------------------------------------|-------------|-----|
| 1<br>2<br>3<br>4<br>5<br>6<br>7                                      | Onion et al.<br>A | 1999 | Maine            | Cross<br>sectional      | 41177  | Not<br>reported | 1990-<br>1992 | Primipara; no<br>previous CS; any risk | Consecutive | Any |
| 8<br>9<br>10<br>11<br>12                                             | Onion et al.<br>B | 1999 | New<br>Hampshire | Cross<br>sectional      | 41401  | Not<br>reported | 1990-<br>1992 | Primipara; no<br>previous CS; any risk | Consecutive | Any |
| 13<br>14<br>15<br>16                                                 | Onion et al.<br>C | 1999 | Vermont          | Cross<br>sectional      | 19077  | Not<br>reported | 1990-<br>1992 | Primipara; no<br>previous CS; any risk | Consecutive | Any |
| 17<br>18<br>19<br>20<br>21                                           | Aron et al.       | 2000 | Ohio             | Retrospective<br>cohort | 25697  | 21              | 1993-<br>1995 | Primipara; no<br>previous CS; any risk | Consecutive | Any |
| 22<br>23<br>24<br>25<br>26                                           | Grant A           | 2005 | All states       | Cross<br>sectional      | 9017   | Not<br>reported | 1988          | Primi- and multipara;<br>any risk      | Random      | Any |
| 27<br>28<br>29<br>30                                                 | Grant B           | 2005 | Florida          | Cross<br>sectional      | 147821 | Not<br>reported | 1992          | Primi- and multipara;<br>any risk      | Consecutive | Any |
| 31<br>32<br>33<br>34<br>35<br>36<br>37<br>38<br>39<br>40<br>41<br>42 | Coonrod et<br>al. | 2008 | Arizona          | Cross<br>sectional      | 28863  | 40              | 2005          | Primipara; low risk                    | Consecutive | Any |

|                    |      |            |                      |         |              |           |                                                |             |           |
|--------------------|------|------------|----------------------|---------|--------------|-----------|------------------------------------------------|-------------|-----------|
| Huesch             | 2011 | New Jersey | Cross sectional      | 182108  | Not reported | 2004-2007 | Primi- and multipara; no previous CS; low risk | Consecutive | Planned   |
| Kozhimannil et al. | 2013 | All states | Cross sectional      | 6717486 | Over 1000    | 2002-2009 | Primi- and multipara; any risk                 | Random      | Any       |
| Huesch et al.      | 2014 | California | Cross sectional      | 408355  | 254          | 2010      | Primi- and multipara; no previous CS; any risk | Consecutive | Planned   |
| Sebastião et al.   | 2016 | Florida    | Retrospective cohort | 412192  | 122          | 2004-2011 | Primipara; no previous CS; low risk            | Consecutive | Emergency |

CS = caesarean section



**Table 2. Caesarean section rates among groups with different insurance status**

| <b>Author</b>   | <b>Year</b> | <b>State</b>  | <b>Year of data collection</b> | <b>CS rate of privately insured (%)</b> | <b>CS rate of publicly insured (%)</b> | <b>CS rate of uninsured (%)</b> |
|-----------------|-------------|---------------|--------------------------------|-----------------------------------------|----------------------------------------|---------------------------------|
| Stafford        | 1990        | California    | 1986                           | 26.8                                    | 22.1                                   | 19.3                            |
| Haas et al. A   | 1993        | Massachusetts | 1984                           | 23.0                                    | 19.4                                   | 17.2                            |
| Haas et al. B   | 1993        | Massachusetts | 1987                           | 25.9                                    | 20.8                                   | 22.4                            |
| Braveman et al. | 1995        | California    | 1991                           | 27.1                                    | 21.2                                   | 23.0                            |
| Burns et al.    | 1995        | Arizona       | 1989                           | n/a                                     | n/a                                    | n/a                             |
| Onion et al. A  | 1999        | Maine         | 1990-1992                      | 15.9                                    | 14.9                                   | 13.4                            |
| Onion et al. B  | 1999        | New Hampshire | 1990-1992                      | 16.1                                    | 13.2                                   | 13.0                            |
| Onion et al. C  | 1999        | Vermont       | 1990-1992                      | 14.5                                    | 13.5                                   | 9.4                             |
| Aron et al.     | 2000        | Ohio          | 1993-1995                      | 17.0                                    | 14.2                                   | 10.7                            |
| Grant A         | 2005        | All states    | 1988                           | 27.0                                    | 23.7                                   | 17.1                            |
| Grant B         | 2005        | Florida       | 1992                           | 30.0                                    | 21.6                                   | 20.7                            |
| Coonrod et al.  | 2008        | Arizona       | 2005                           | 26.0                                    | 19.0                                   | 20.0                            |
| Huesch          | 2011        | New Jersey    | 2004-2007                      | 26.7                                    | 22.5                                   | 20.3                            |

|                    |      |            |               |      |      |      |
|--------------------|------|------------|---------------|------|------|------|
|                    |      |            | 2002-         |      |      |      |
| Kozhimannil et al. | 2013 | All states | 2009          | n/a  | n/a  | n/a  |
| Huesch et al.      | 2014 | California | 2010          | 13.9 | 10.7 | 13.0 |
| Sebastião et al.   | 2016 | Florida    | 2004-<br>2011 | 25.2 | 22.8 | 19.7 |

\*The rates are adjusted as compared to the rates from other studies which are crude rates.

CS rates bellow 10% benchmark

CS rates bellow 19% benchmark

## Figure legends

**Figure 1. The flow diagram of review**

**Figure 2. Adjusted odds ratios of caesarean section**

**Figure 3. Subgroup analyses for adjusted estimates/Legend: \*P for trend**

**Figure 4. Crude odds ratios of caesarean section**

## Supporting information

**Appendix 1. Search Strategy**

**Appendix 2. List of the extracted variables**

**Appendix 3. List of excluded articles**

**Appendix 4. Type of data used**

**Appendix 5. Reported exclusion criteria**

1  
2  
3 **Appendix 6. Covariates used for statistical adjustment**  
4

5 **Appendix 7. QUIPS risk of bias**  
6  
7  
8  
9  
10  
11  
12  
13  
14  
15  
16  
17  
18  
19  
20  
21  
22  
23  
24  
25  
26  
27  
28  
29  
30  
31  
32  
33  
34  
35  
36  
37  
38  
39  
40  
41  
42  
43  
44  
45  
46  
47  
48  
49  
50  
51  
52  
53  
54  
55  
56  
57  
58  
59  
60

For peer review only

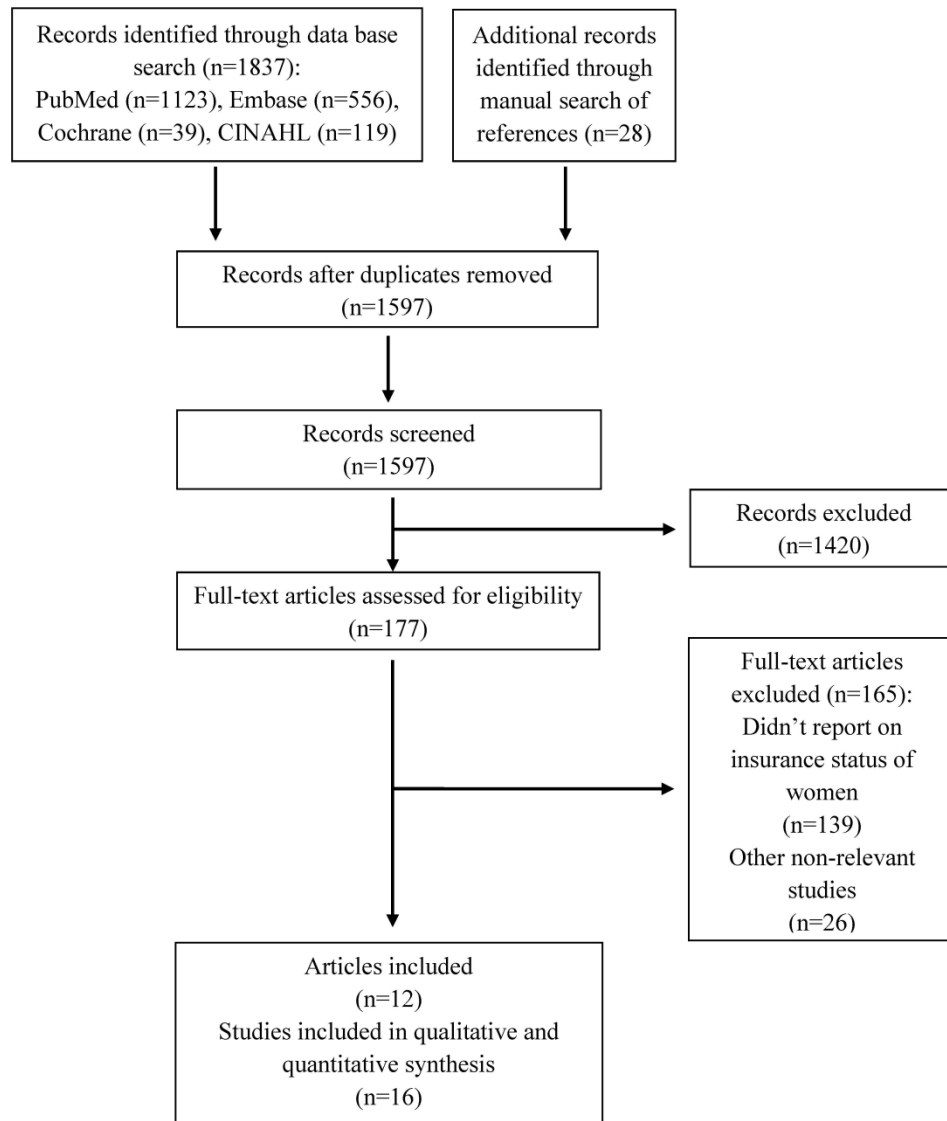

Figure 1. The flow diagram of review

1072x1261mm (96 x 96 DPI)

**Uninsured vs privately insured**

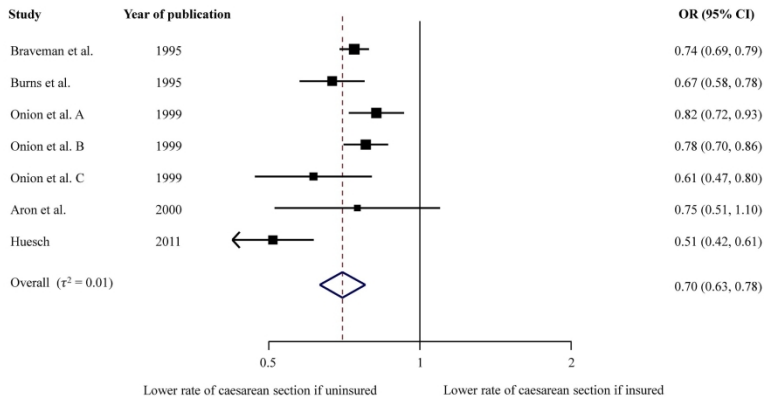

**Uninsured vs publicly insured**

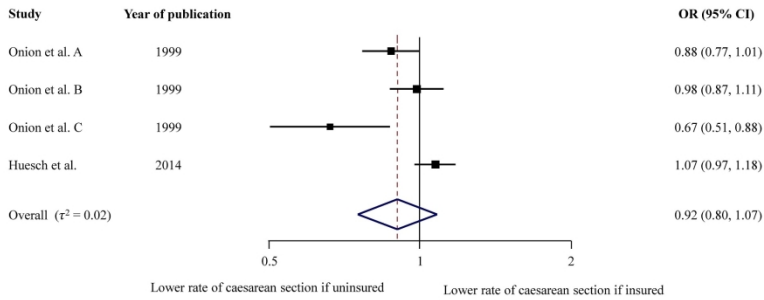

**Uninsured vs publicly or privately insured**

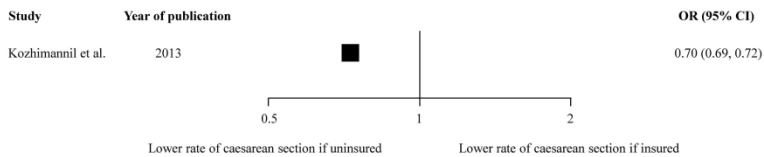

Figure 2. Adjusted odds ratios of caesarean section

529x791mm (96 x 96 DPI)

Uninsured vs privately insured

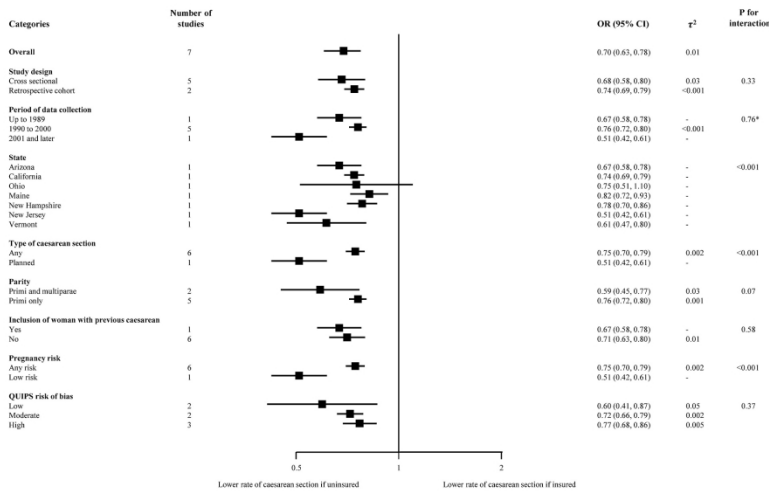

Uninsured vs publicly insured

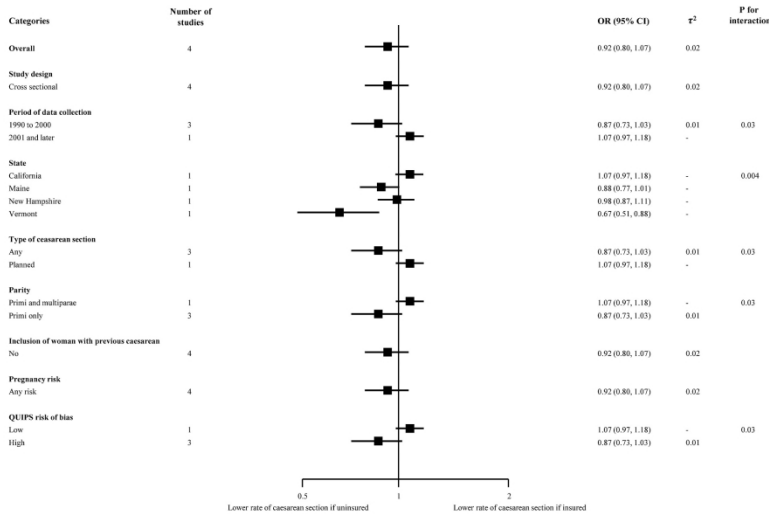

Figure 3. Subgroup analyses for adjusted estimates/\*P for trend

529x784mm (96 x 96 DPI)

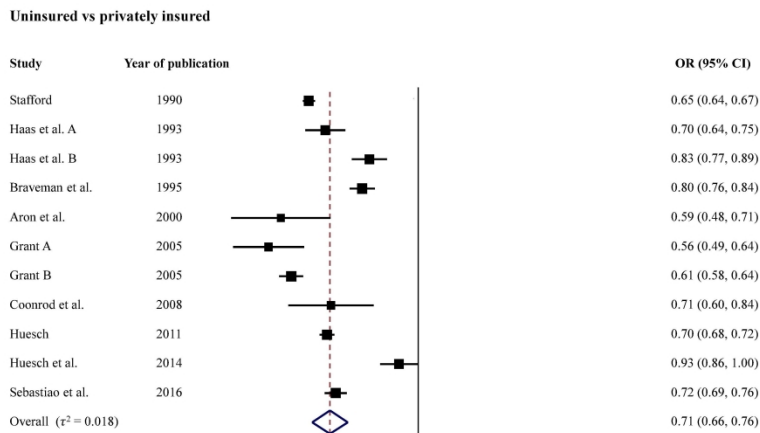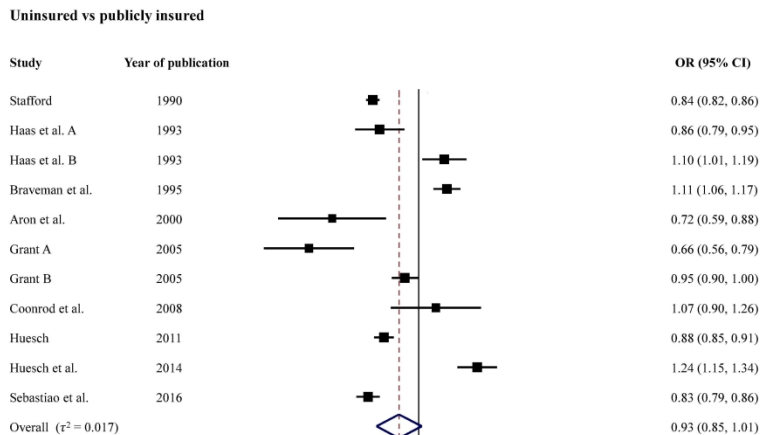

Figure 4. Crude odds ratios of caesarean section

862x1308mm (96 x 96 DPI)

## Appendix 1. Search Strategy

### 1. For Medline (PubMed)

((((((causes OR determinants OR statistics OR rates OR factors OR decision\* OR physician\* OR socioeconomic OR state medicine OR evidence-based OR hospital OR hospitals OR hospitalization OR hospitalized OR uncertain\* OR educational status OR social class OR obstetric\* OR gynecolog\* OR supply OR distribut\* OR utilization OR insurance OR choice OR attitude OR patient OR economics OR maternal OR accessib\* OR health service\* OR rural population OR urban population[Title/Abstract])) NOT medline[sb])) OR ("Decision Making"[Mesh] OR "Physician's Practice Patterns"[Mesh] OR "Socioeconomic Factors"[Mesh] OR "State Medicine"[Mesh] OR "Evidence-Based Medicine"[Mesh] OR "Hospitals"[Mesh] OR "Uncertainty"[Mesh] OR "Educational Status"[Mesh] OR "Hospital Costs"[Mesh] OR "Physician Incentive Plans"[Mesh] OR "Social Class"[Mesh] OR "Obstetrics and Gynecology Department, Hospital"[Mesh] OR "supply and distribution"[Subheading] OR "utilization"[Subheading] OR "Insurance"[Mesh] OR "Choice Behavior"[Mesh] OR "Attitude to Health"[Mesh] OR "Patient Participation"[Mesh] OR "Physician-Patient Relations"[Mesh] OR "Economics, Hospital"[Mesh] OR "Maternal Health Services"[Mesh] OR "Health Services Accessibility"[Mesh] OR "Health Services Research"[Mesh] OR "Rural Population"[Mesh] OR "Urban Population"[Mesh])) OR factors OR rates OR statistics OR causes OR determinants AND (((operative delivery OR caesarean section OR cesarean section OR c-section OR c section OR caesarean OR cesarean OR caesarean delivery OR cesarean delivery OR caesarean rates OR cesarean rates)))) OR cesarean section [MeSH Terms])) AND (((("Catchment Area (Health)"[Mesh] OR "Small-Area Analysis"[Mesh])) OR (((small area analysis OR small area analyses OR medical practice variation OR regions OR geographic variation OR variation))))))



**Appendix 2. List of the extracted variables**

| <b>General information</b>                        |                               |                                          |
|---------------------------------------------------|-------------------------------|------------------------------------------|
|                                                   |                               | Author                                   |
|                                                   |                               | Year                                     |
|                                                   |                               | State                                    |
|                                                   |                               | Study design                             |
|                                                   |                               | Number of cases                          |
|                                                   |                               | Number of hospital units                 |
|                                                   |                               | Year of data collection                  |
|                                                   |                               | Population                               |
|                                                   |                               | Sampling                                 |
|                                                   |                               | Type of CS analyzed                      |
|                                                   |                               |                                          |
| <b>Type of data used</b>                          |                               |                                          |
|                                                   |                               | Type of data used                        |
|                                                   |                               |                                          |
| <b>Reported exclusion criteria</b>                |                               |                                          |
|                                                   |                               | Source population                        |
|                                                   | Maternal characteristics      | Age $\leq 14$                            |
|                                                   |                               | Racial or ethnic minorities              |
|                                                   |                               | Multipara                                |
|                                                   |                               | Previous caesarean section               |
|                                                   |                               | Other risk factors for caesarean section |
|                                                   | Fetus characteristics         | Stillbirth                               |
|                                                   |                               | Multiple delivery (twin or more)         |
|                                                   |                               | Newborn weighting <500 gr                |
|                                                   |                               | Breach presentation                      |
|                                                   |                               | Other malpresentation                    |
|                                                   |                               | Preterm delivery (less than 37 weeks)    |
|                                                   |                               | Other risk factors for caesarean section |
|                                                   |                               | Not in labor                             |
|                                                   |                               | Cases with missing data                  |
|                                                   |                               | Provider characteristics                 |
|                                                   |                               | Other factors                            |
|                                                   |                               |                                          |
| <b>Covariates used for statistical adjustment</b> |                               |                                          |
|                                                   | Maternal preconception status | Ethnicity/Race                           |
|                                                   |                               | Educational level                        |
|                                                   |                               | Marital status                           |
|                                                   |                               | Economic status                          |
|                                                   |                               | Insurances status                        |
|                                                   |                               | Urban status                             |

|  |                                                                             |                                            |
|--|-----------------------------------------------------------------------------|--------------------------------------------|
|  |                                                                             | Weight                                     |
|  |                                                                             | Height                                     |
|  |                                                                             | Body mass index                            |
|  |                                                                             | Age                                        |
|  | Maternal clinical status                                                    | Parity                                     |
|  |                                                                             | Previous caesarean section                 |
|  |                                                                             | Pre-existing (before pregnancy) conditions |
|  |                                                                             | Conditions developed during pregnancy      |
|  | Fetus characteristics                                                       | Gestational age                            |
|  |                                                                             | Birth weight                               |
|  |                                                                             | Other characteristics                      |
|  | Prenatal care                                                               |                                            |
|  | Delivery characteristics                                                    |                                            |
|  | Provider characteristics                                                    |                                            |
|  | Other variables                                                             |                                            |
|  | Total number of covariates                                                  |                                            |
|  |                                                                             |                                            |
|  | <b>QUIPS risk of bias</b>                                                   |                                            |
|  | Study Participation                                                         |                                            |
|  | Study Attrition                                                             |                                            |
|  | Prognostic Factor Measurement                                               |                                            |
|  | Outcome Measurement                                                         |                                            |
|  | Study Confounding                                                           |                                            |
|  | Statistical Analysis and Reporting                                          |                                            |
|  | Overall rating                                                              |                                            |
|  |                                                                             |                                            |
|  | <b>Caesarean section rates among groups with different insurance status</b> |                                            |
|  | State                                                                       |                                            |
|  | Year of data collection                                                     |                                            |
|  | CS rate of privately insured (%)                                            |                                            |
|  | CS rate of publicly insured (%)                                             |                                            |
|  | CS rate of uninsured (%)                                                    |                                            |
|  |                                                                             |                                            |
|  | <b>Effect estimate</b>                                                      |                                            |
|  | Determinant being compared                                                  |                                            |
|  | Comparator (reference)                                                      |                                            |
|  | Unadjusted outcome measure                                                  |                                            |
|  | Effect size                                                                 |                                            |
|  | Lower CI95%                                                                 |                                            |
|  | Upper CI95%                                                                 |                                            |
|  | SE                                                                          |                                            |
|  | Determinant being compared                                                  |                                            |
|  | Comparator (reference)                                                      |                                            |

|  |                                  |  |
|--|----------------------------------|--|
|  | Adjusted outcome measure         |  |
|  | Effect size                      |  |
|  | Lower CI95%                      |  |
|  | Upper CI95%                      |  |
|  | SE                               |  |
|  |                                  |  |
|  | <b>Number of cases by groups</b> |  |
|  | Total births (all groups)        |  |
|  | Total No-CS (all groups)         |  |
|  | Total CS (all groups)            |  |
|  | Total births in group 1          |  |
|  | No-CS in group 1                 |  |
|  | CS in group 1                    |  |
|  | Total births in group 2          |  |
|  | No-CS in group 2                 |  |
|  | CS in group 2                    |  |
|  | Total births in group 3          |  |
|  | No-CS in group 3                 |  |
|  | CS in group 3                    |  |

### Appendix 3. List of excluded articles

| <b>Author, Year</b>               | <b>Reason for exclusion</b>                |
|-----------------------------------|--------------------------------------------|
| 1 Adhikari Dahal, et al., 2017    | Didn't report on insurance status of women |
| 2 Armstrong, et al., 2016         | Didn't report on insurance status of women |
| 3 Bailit, et al., 2006            | Didn't report on insurance status of women |
| 4 Bannister-Tyrrell, et al., 2015 | Didn't report on insurance status of women |
| 5 Blais, 1993                     | Didn't report on insurance status of women |
| 6 Brown, 2007                     | Didn't report on insurance status of women |
| 7 Brown, et al., 2013             | Other non-relevant studies                 |
| 8 Butcher, et al., 1997           | Didn't report on insurance status of women |
| 9 Caceres, et al., 2013           | Didn't report on insurance status of women |
| 10 Carayol, et al., 2007          | Didn't report on insurance status of women |
| 11 Carayol, et al., 2007          | Didn't report on insurance status of women |
| 12 Carayol, et al., 2008          | Didn't report on insurance status of women |
| 13 Carlisle, et al., 1996         | Didn't report on insurance status of women |
| 14 Chauhan, et al., 2008          | Other non-relevant studies                 |
| 15 Chen, et al., 2003             | Other non-relevant studies                 |
| 16 Chen, et al., 2014             | Didn't report on insurance status of women |
| 17 Chen, et al., 2016             | Didn't report on insurance status of women |
| 18 Cheng, et al., 2015            | Other non-relevant studies                 |
| 19 Cisse, et al., 1998            | Other non-relevant studies                 |
| 20 Clark, et al., 2007            | Didn't report on insurance status of women |
| 21 Clark, et al., 2014            | Didn't report on insurance status of women |
| 22 Clarke, et al., 1995           | Didn't report on insurance status of women |
| 23 Clarke, et al., 1996           | Didn't report on insurance status of women |
| 24 Clayton, et al., 2013          | Didn't report on insurance status of women |
| 25 Coonrod, et al., 2008          | Didn't report on insurance status of women |
| 26 Coulm, et al., 2012            | Didn't report on insurance status of women |
| 27 Cressie, 1993                  | Other non-relevant studies                 |
| 28 Da Silva Campi, et al., 2014   | Didn't report on insurance status of women |
| 29 da Silva, et al., 2003         | Other non-relevant studies                 |
| 30 Danishevski, et al., 2008      | Other non-relevant studies                 |
| 31 Daw, et al., 2018              | Didn't report on insurance status of women |
| 32 de Regt, et al., 1986          | Didn't report on insurance status of women |
| 33 Di Mario, et al., 2013         | Didn't report on insurance status of women |
| 34 Dimitrov, 1998                 | Other non-relevant studies                 |
| 35 Eckerlund, et al., 1998        | Didn't report on insurance status of women |
| 36 Edmonds, et al., 2015          | Other non-relevant studies                 |
| 37 Edmonds, et al., 2017          | Didn't report on insurance status of women |
| 38 Emmett, et al., 2010           | Other non-relevant studies                 |
| 39 Epstein, et al., 2009          | Didn't report on insurance status of women |
| 40 Franca, et al., 2016           | Didn't report on insurance status of women |

|    |                                 |                                            |
|----|---------------------------------|--------------------------------------------|
| 1  |                                 |                                            |
| 2  | 41 Gama, et al., 2009           | Other non-relevant studies                 |
| 3  | 42 Garcia, et al., 2001         | Didn't report on insurance status of women |
| 4  | 43 Gates, 1995                  | Didn't report on insurance status of women |
| 5  |                                 |                                            |
| 6  | 44 Gittelsohn, et al., 1995     | Didn't report on insurance status of women |
| 7  | 45 Gomes, et al., 1999          | Didn't report on insurance status of women |
| 8  | 46 Gonzalez-Perez, et al., 2001 | Didn't report on insurance status of women |
| 9  |                                 |                                            |
| 10 | 47 Goyert, et al., 1989         | Didn't report on insurance status of women |
| 11 | 48 Gregory, et al., 2001        | Didn't report on insurance status of women |
| 12 | 49 Gross, et al., 2015          | Didn't report on insurance status of women |
| 13 | 50 Grytten, et al., 2011        | Didn't report on insurance status of women |
| 14 | 51 Grytten, et al., 2012        | Didn't report on insurance status of women |
| 15 | 52 Gumedde, et al., 2017        | Didn't report on insurance status of women |
| 16 | 53 Hanley, et al., 2010         | Didn't report on insurance status of women |
| 17 | 54 Haraldsdottir, et al., 2015  | Didn't report on insurance status of women |
| 18 | 55 Haupt, 1982                  | Other non-relevant studies                 |
| 19 | 56 Heffner, et al., 2003        | Didn't report on insurance status of women |
| 20 | 57 Helfand, et al., 1997        | Didn't report on insurance status of women |
| 21 | 58 Henke, et al., 2014          | Didn't report on insurance status of women |
| 22 | 59 Hofmeyr, et al., 2015        | Other non-relevant studies                 |
| 23 | 60 Hopkins, et al., 2014        | Didn't report on insurance status of women |
| 24 | 61 Hsu, et al., 2008            | Didn't report on insurance status of women |
| 25 | 62 Hueston, et al., 2001        | Didn't report on insurance status of women |
| 26 | 63 Jessee, et al., 1982         | Didn't report on insurance status of women |
| 27 | 64 Johnson, et al., 1995        | Didn't report on insurance status of women |
| 28 | 65 Joyce, et al., 2002          | Didn't report on insurance status of women |
| 29 | 66 Kennare, 2003                | Other non-relevant studies                 |
| 30 | 67 Keskimaki, et al., 1994      | Didn't report on insurance status of women |
| 31 | 68 Khan, et al., 2017           | Didn't report on insurance status of women |
| 32 | 69 Kim, et al., 2012            | Didn't report on insurance status of women |
| 33 | 70 Kim, et al., 2016            | Didn't report on insurance status of women |
| 34 | 71 Kimsey, et al., 2017         | Didn't report on insurance status of women |
| 35 | 72 Klassen, 1975                | Didn't report on insurance status of women |
| 36 | 73 Klemetti, et al., 2010       | Didn't report on insurance status of women |
| 37 | 74 Koroukian, et al., 2001      | Didn't report on insurance status of women |
| 38 | 75 Korst, et al., 2005          | Didn't report on insurance status of women |
| 39 | 76 Kozhimannil, et al., 2014    | Didn't report on insurance status of women |
| 40 | 77 Krivenko, et al., 1994       | Other non-relevant studies                 |
| 41 | 78 Kyu-Tae, et al., 2017        | Didn't report on insurance status of women |
| 42 | 79 Lee, et al., 2007            | Didn't report on insurance status of women |
| 43 | 80 Lee, et al., 2014            | Didn't report on insurance status of women |
| 44 | 81 Leung, et al., 2001          | Didn't report on insurance status of women |
| 45 | 82 Li, et al., 2017             | Didn't report on insurance status of women |
| 46 | 83 Librero, et al., 2000        | Didn't report on insurance status of women |
| 47 |                                 |                                            |
| 48 |                                 |                                            |
| 49 |                                 |                                            |
| 50 |                                 |                                            |
| 51 |                                 |                                            |
| 52 |                                 |                                            |
| 53 |                                 |                                            |
| 54 |                                 |                                            |
| 55 |                                 |                                            |
| 56 |                                 |                                            |
| 57 |                                 |                                            |
| 58 |                                 |                                            |
| 59 |                                 |                                            |
| 60 |                                 |                                            |

|    |                                   |                                            |
|----|-----------------------------------|--------------------------------------------|
| 1  |                                   |                                            |
| 2  | 84 Lidegaard, et al., 1994        | Didn't report on insurance status of women |
| 3  | 85 Little, et al., 2015           | Didn't report on insurance status of women |
| 4  | 86 Liu, et al., 2007              | Didn't report on insurance status of women |
| 5  | 87 Localio, et al., 1993          | Didn't report on insurance status of women |
| 6  | 88 Lundsberg, et al., 2017        | Didn't report on insurance status of women |
| 7  | 89 Lutomski, et al.,              | Didn't report on insurance status of women |
| 8  | 90 Lutomski, et al., 2014         | Didn't report on insurance status of women |
| 9  | 91 Maeda, et al., 2018            | Didn't report on insurance status of women |
| 10 | 92 Marquez-Calderon, et al., 2011 | Didn't report on insurance status of women |
| 11 | 93 McKenzie, et al., 1993         | Didn't report on insurance status of women |
| 12 | 94 Menard, 1999                   | Didn't report on insurance status of women |
| 13 | 95 Mendlovic, et al., 2017        | Didn't report on insurance status of women |
| 14 | 96 Mesterton, et al., 2017        | Didn't report on insurance status of women |
| 15 | 97 Mikolajczyk, et al., 2013      | Didn't report on insurance status of women |
| 16 | 98 Mindell, et al., 1982          | Didn't report on insurance status of women |
| 17 | 99 Misra, 2008                    | Didn't report on insurance status of women |
| 18 | 100 Mitler, et al., 2000          | Didn't report on insurance status of women |
| 19 | 101 Mossialos, et al., 2005       | Didn't report on insurance status of women |
| 20 | 102 Movsas, et al., 2012          | Didn't report on insurance status of women |
| 21 | 103 Murray, 2000                  | Didn't report on insurance status of women |
| 22 | 104 Murray, et al., 1997          | Didn't report on insurance status of women |
| 23 | 105 Naiditch, et al., 1997        | Didn't report on insurance status of women |
| 24 | 106 Newton, et al., 1989          | Didn't report on insurance status of women |
| 25 | 107 Nicholson, et al., 2009       | Didn't report on insurance status of women |
| 26 | 108 Nigam, 2011                   | Didn't report on insurance status of women |
| 27 | 109 Nilsen, et al., 2014          | Didn't report on insurance status of women |
| 28 | 110 Nirupam, et al., 1995         | Other non-relevant studies                 |
| 29 | 111 Oleske, et al., 1991          | Didn't report on insurance status of women |
| 30 | 112 Ono, et al., 2016             | Didn't report on insurance status of women |
| 31 | 113 Paranjothy, et al., 2005      | Didn't report on insurance status of women |
| 32 | 114 Parazzini, et al., 2015       | Didn't report on insurance status of women |
| 33 | 115 Pel, et al., 1995             | Other non-relevant studies                 |
| 34 | 116 Phipps, et al., 2014          | Other non-relevant studies                 |
| 35 | 117 Placek, et al., 1980          | Didn't report on insurance status of women |
| 36 | 118 Rabilloud, et al., 1998       | Didn't report on insurance status of women |
| 37 | 119 Raifman, et al., 2014         | Didn't report on insurance status of women |
| 38 | 120 Rattner, 1996                 | Didn't report on insurance status of women |
| 39 | 121 Ravindran, 2003               | Other non-relevant studies                 |
| 40 | 122 Ravindran, 2008               | Didn't report on insurance status of women |
| 41 | 123 Renzi, et al., 2012           | Didn't report on insurance status of women |
| 42 | 124 Ribeiro, et al., 2007         | Didn't report on insurance status of women |
| 43 | 125 Riddell, et al., 2017         | Didn't report on insurance status of women |
| 44 | 126 Rohrer, 1993                  | Other non-relevant studies                 |
| 45 |                                   |                                            |
| 46 |                                   |                                            |
| 47 |                                   |                                            |
| 48 |                                   |                                            |
| 49 |                                   |                                            |
| 50 |                                   |                                            |
| 51 |                                   |                                            |
| 52 |                                   |                                            |
| 53 |                                   |                                            |
| 54 |                                   |                                            |
| 55 |                                   |                                            |
| 56 |                                   |                                            |
| 57 |                                   |                                            |
| 58 |                                   |                                            |
| 59 |                                   |                                            |
| 60 |                                   |                                            |

|    |                                    |                                            |
|----|------------------------------------|--------------------------------------------|
| 1  |                                    |                                            |
| 2  | 127 Roohan, et al., 2001           | Didn't report on insurance status of women |
| 3  | 128 Rossignol, et al., 2013        | Didn't report on insurance status of women |
| 4  | 129 Rowe, et al., 2014             | Didn't report on insurance status of women |
| 5  | 130 Sandall, et al., 2013          | Other non-relevant studies                 |
| 6  |                                    |                                            |
| 7  | 131 Sarria Santamera, et al., 1994 | Didn't report on insurance status of women |
| 8  | 132 Schemann, et al., 2015         | Didn't report on insurance status of women |
| 9  | 133 Schemann, et al., 2016         | Didn't report on insurance status of women |
| 10 | 134 Sentell, et al., 2016          | Didn't report on insurance status of women |
| 11 | 135 Shiono, et al., 1987           | Didn't report on insurance status of women |
| 12 | 136 Shorten, et al., 2007          | Didn't report on insurance status of women |
| 13 | 137 Signorelli, et al., 1991       | Didn't report on insurance status of women |
| 14 | 138 Singata, et al., 2013          | Other non-relevant studies                 |
| 15 | 139 Snyder, et al., 2011           | Didn't report on insurance status of women |
| 16 | 140 Souza, et al., 2016            | Didn't report on insurance status of women |
| 17 | 141 Sufang, et al., 2007           | Didn't report on insurance status of women |
| 18 | 142 Tang, et al., 2006             | Didn't report on insurance status of women |
| 19 | 143 Tang, et al., 2006             | Didn't report on insurance status of women |
| 20 | 144 Tracy, et al., 2006            | Didn't report on insurance status of women |
| 21 | 145 Tucker, et al.,                | Didn't report on insurance status of women |
| 22 | 146 Tussing, et al., 1994          | Didn't report on insurance status of women |
| 23 | 147 Vadnais, et al., 2017          | Didn't report on insurance status of women |
| 24 | 148 Vankan, et al., 2017           | Didn't report on insurance status of women |
| 25 | 149 Vayda, et al., 1984            | Didn't report on insurance status of women |
| 26 | 150 Vecino-Ortiz, et al.,          | Didn't report on insurance status of women |
| 27 | 151 Wang, et al., 2017             | Didn't report on insurance status of women |
| 28 | 152 Ward, et al., 2010             | Other non-relevant studies                 |
| 29 | 153 Weber, 1990                    | Other non-relevant studies                 |
| 30 | 154 Wei, et al., 2013              | Other non-relevant studies                 |
| 31 | 155 Woolbright, 1996               | Didn't report on insurance status of women |
| 32 | 156 Xing Lin, et al., 2012         | Didn't report on insurance status of women |
| 33 | 157 Xirasagar, et al., 2004        | Didn't report on insurance status of women |
| 34 | 158 Xirasagar, et al., 2006        | Didn't report on insurance status of women |
| 35 | 159 Xirasagar, et al., 2007        | Didn't report on insurance status of women |
| 36 | 160 Yang, et al., 2014             | Didn't report on insurance status of women |
| 37 | 161 Yi-Chen, et al., 2012          | Didn't report on insurance status of women |
| 38 | 162 Zdeb, et al., 1980             | Didn't report on insurance status of women |
| 39 | 163 Zere, et al., 2010             | Didn't report on insurance status of women |
| 40 | 164 Zhang, et al., 2013            | Didn't report on insurance status of women |
| 41 | 165 Zwecker, et al., 2011          | Didn't report on insurance status of women |
| 42 |                                    |                                            |
| 43 |                                    |                                            |
| 44 |                                    |                                            |
| 45 |                                    |                                            |
| 46 |                                    |                                            |
| 47 |                                    |                                            |
| 48 |                                    |                                            |
| 49 |                                    |                                            |
| 50 |                                    |                                            |
| 51 |                                    |                                            |
| 52 |                                    |                                            |
| 53 |                                    |                                            |
| 54 |                                    |                                            |
| 55 |                                    |                                            |
| 56 |                                    |                                            |
| 57 |                                    |                                            |
| 58 |                                    |                                            |
| 59 |                                    |                                            |
| 60 |                                    |                                            |

1  
2  
3 **Appendix 4. Type of data used**

4  
5  
6  
7  
8  
9  
10  
11  
12  
13  
14  
15  
16  
17  
18  
19  
20  
21  
22  
23  
24  
25  
26  
27  
28  
29  
30  
31  
32  
33  
34  
35  
36  
37  
38  
39  
40  
41  
42  
43  
44  
45  
46  
47

| Author             | Year | Survey | Hospital records | Birth certificates/registry | Census data |
|--------------------|------|--------|------------------|-----------------------------|-------------|
| Stafford           | 1990 |        | +                |                             |             |
| Haas et al. A      | 1993 |        | +                | +                           |             |
| Haas et al. B      | 1993 |        | +                | +                           |             |
| Braveman et al.    | 1995 |        |                  | +                           | +           |
| Burns et al.       | 1995 |        | +                | +                           |             |
| Onion et al. A     | 1999 |        | +                |                             |             |
| Onion et al. B     | 1999 |        | +                |                             |             |
| Onion et al. C     | 1999 |        | +                |                             |             |
| Aron et al.        | 2000 |        | +                |                             |             |
| Grant A            | 2005 | +      |                  |                             |             |
| Grant B            | 2005 |        | +                |                             |             |
| Coonrod et al.     | 2008 |        |                  | +                           |             |
| Huesch             | 2011 |        | +                |                             |             |
| Kozhimannil et al. | 2013 |        | +                |                             |             |
| Huesch et al.      | 2014 |        | +                |                             |             |
| Sebastião et al.   | 2016 |        | +                | +                           |             |



## Appendix 5. Reported exclusion criteria

| Authors            | Year | Source population                                | Maternal characteristics |                             |           |                            |                                          |            | Fetus characteristics            |                           |                     |                       |                                       |                                          | Not in labor | Cases with missing data | Provider characteristics | Other factors |   |
|--------------------|------|--------------------------------------------------|--------------------------|-----------------------------|-----------|----------------------------|------------------------------------------|------------|----------------------------------|---------------------------|---------------------|-----------------------|---------------------------------------|------------------------------------------|--------------|-------------------------|--------------------------|---------------|---|
|                    |      |                                                  | Age ≤14                  | Racial or ethnic minorities | Multipara | Previous caesarean section | Other risk factors for caesarean section | Stillbirth | Multiple delivery (twin or more) | Newborn weighting <500 gr | Breach presentation | Other malpresentation | Preterm delivery (less than 37 weeks) | Other risk factors for caesarean section |              |                         |                          |               |   |
| Stafford           | 1990 | All deliveries in California, United States      |                          |                             |           |                            |                                          |            |                                  |                           |                     |                       |                                       |                                          |              |                         |                          |               |   |
| Haas et al. A      | 1993 | All deliveries in Massachusetts, United States   |                          |                             |           |                            |                                          | +          | +                                | +                         |                     |                       |                                       |                                          |              |                         | +                        |               |   |
| Haas et al. B      | 1993 | All deliveries in Massachusetts, United States   |                          |                             |           |                            |                                          | +          | +                                | +                         |                     |                       |                                       |                                          |              |                         | +                        |               |   |
| Braveman et al.    | 1995 | All deliveries in California, United States      |                          |                             | +         | +                          |                                          | +          | +                                |                           |                     |                       | +                                     |                                          |              |                         | +                        |               |   |
| Burns et al.       | 1995 | All deliveries in Arizona, United States         |                          |                             |           |                            |                                          |            |                                  |                           |                     |                       |                                       |                                          |              |                         | +                        | +             |   |
| Onion et al. A     | 1999 | All deliveries in Maine, United States           |                          |                             | +         | +                          |                                          |            | +                                |                           |                     |                       |                                       |                                          |              |                         |                          | +             |   |
| Onion et al. B     | 1999 | All deliveries in New Hampshire, United States   |                          |                             | +         | +                          |                                          |            | +                                |                           |                     |                       |                                       |                                          |              |                         |                          | +             |   |
| Onion et al. C     | 1999 | All deliveries in Vermont, United States         |                          |                             | +         | +                          |                                          |            | +                                |                           |                     |                       |                                       |                                          |              |                         |                          | +             |   |
| Aron et al.        | 2000 | All deliveries in Cleveland, Ohio, United States |                          |                             |           | +                          |                                          |            |                                  |                           | +                   | *                     |                                       |                                          |              |                         | +                        | +             | + |
| Grant A            | 2005 | All deliveries, United States                    |                          |                             |           |                            |                                          |            |                                  |                           |                     |                       |                                       |                                          |              |                         | +                        |               |   |
| Grant B            | 2005 | All deliveries in Florida, United States         |                          |                             |           |                            |                                          |            |                                  |                           |                     |                       |                                       |                                          |              |                         | +                        | +             | + |
| Coonrod et al.     | 2008 | All deliveries in Arizona, United States         |                          | +                           | +         |                            |                                          | +          | +                                |                           |                     |                       | +                                     | +                                        | +            |                         |                          | +             |   |
| Huesch             | 2011 | All deliveries in New Jersey, United States      |                          |                             |           | +                          | +                                        |            | +                                |                           |                     |                       | +                                     | +                                        | +            | +                       |                          | +             |   |
| Kozhimannil et al. | 2013 | All deliveries in 44 states, United States       |                          |                             |           |                            |                                          |            |                                  |                           |                     |                       |                                       |                                          |              |                         |                          | +             |   |
| Huesch et al.      | 2014 | All deliveries in California, United States      | +                        |                             |           | +                          |                                          |            |                                  |                           |                     |                       |                                       |                                          |              |                         | +                        |               |   |
| Sebastião et al.   | 2016 | All deliveries in Florida, United States         |                          |                             | +         | +                          |                                          | +          | +                                |                           |                     |                       | +                                     | +                                        | +            | +                       | +                        | +             | + |

\*500 or less grams

### Appendix 6. Covariates used for statistical adjustment

| Author             | Year | Maternal preconception status |                   |                |                 |                   |              |        |        |                 |     | Maternal clinical status |                            |                                            | Fetus characteristics                 |                 |              | Prenatal care | Delivery characteristics | Provider characteristics | Other variables | Total number of covariates |                       |  |  |  |  |  |  |  |  |  |  |    |     |
|--------------------|------|-------------------------------|-------------------|----------------|-----------------|-------------------|--------------|--------|--------|-----------------|-----|--------------------------|----------------------------|--------------------------------------------|---------------------------------------|-----------------|--------------|---------------|--------------------------|--------------------------|-----------------|----------------------------|-----------------------|--|--|--|--|--|--|--|--|--|--|----|-----|
|                    |      | Ethnicity/Race                | Educational level | Marital status | Economic status | Insurances status | Urban status | Weight | Height | Body mass index | Age | Parity                   | Previous caesarean section | Pre-existing (before pregnancy) conditions | Conditions developed during pregnancy | Gestational age | Birth weight |               |                          |                          |                 |                            | Other characteristics |  |  |  |  |  |  |  |  |  |  |    |     |
| Stafford*          | 1990 |                               |                   |                |                 |                   |              |        |        |                 |     |                          |                            |                                            |                                       |                 |              |               |                          |                          |                 |                            |                       |  |  |  |  |  |  |  |  |  |  | 0  |     |
| Haas et al. A*     | 1993 |                               |                   |                |                 |                   |              |        |        |                 |     |                          |                            |                                            |                                       |                 |              |               |                          |                          |                 |                            |                       |  |  |  |  |  |  |  |  |  |  | 0  |     |
| Haas et al. B*     | 1993 |                               |                   |                |                 |                   |              |        |        |                 |     |                          |                            |                                            |                                       |                 |              |               |                          |                          |                 |                            |                       |  |  |  |  |  |  |  |  |  |  | 0  |     |
| Braveman et al.    | 1995 | +                             | +                 | +              | +               | +                 |              |        |        |                 |     |                          |                            |                                            |                                       |                 |              |               |                          |                          |                 |                            |                       |  |  |  |  |  |  |  |  |  |  | 15 |     |
| Burns et al.       | 1995 | +                             | +                 |                |                 |                   |              |        |        |                 |     |                          |                            |                                            |                                       |                 |              |               |                          |                          |                 |                            |                       |  |  |  |  |  |  |  |  |  |  | 33 |     |
| Onion et al. A     | 1999 |                               |                   |                |                 |                   |              |        |        |                 |     |                          |                            |                                            |                                       |                 |              |               |                          |                          |                 |                            |                       |  |  |  |  |  |  |  |  |  |  | 1  |     |
| Onion et al. B     | 1999 |                               |                   |                |                 |                   |              |        |        |                 |     |                          |                            |                                            |                                       |                 |              |               |                          |                          |                 |                            |                       |  |  |  |  |  |  |  |  |  |  | 1  |     |
| Onion et al. C     | 1999 |                               |                   |                |                 |                   |              |        |        |                 |     |                          |                            |                                            |                                       |                 |              |               |                          |                          |                 |                            |                       |  |  |  |  |  |  |  |  |  |  | 1  |     |
| Aron et al.        | 2000 |                               |                   |                |                 |                   |              |        |        |                 |     |                          |                            |                                            |                                       |                 |              |               |                          |                          |                 |                            |                       |  |  |  |  |  |  |  |  |  |  | 39 |     |
| Grant A*           | 2005 |                               |                   |                |                 |                   |              |        |        |                 |     |                          |                            |                                            |                                       |                 |              |               |                          |                          |                 |                            |                       |  |  |  |  |  |  |  |  |  |  | 0  |     |
| Grant B*           | 2005 |                               |                   |                |                 |                   |              |        |        |                 |     |                          |                            |                                            |                                       |                 |              |               |                          |                          |                 |                            |                       |  |  |  |  |  |  |  |  |  |  | 0  |     |
| Coonrod et al.*    | 2008 |                               |                   |                |                 |                   |              |        |        |                 |     |                          |                            |                                            |                                       |                 |              |               |                          |                          |                 |                            |                       |  |  |  |  |  |  |  |  |  |  | 0  |     |
| Huesch             | 2011 | +                             |                   | +              |                 |                   |              |        |        |                 |     |                          |                            |                                            |                                       |                 |              |               |                          |                          |                 |                            |                       |  |  |  |  |  |  |  |  |  |  | 8  |     |
| Kozhimannil et al. | 2013 | +                             |                   |                |                 |                   |              |        |        |                 |     |                          |                            |                                            |                                       |                 |              |               |                          |                          |                 |                            |                       |  |  |  |  |  |  |  |  |  |  | 16 |     |
| Huesch et al.      | 2014 | +                             |                   |                |                 | +                 |              |        |        |                 |     |                          |                            |                                            |                                       |                 |              |               |                          |                          |                 |                            |                       |  |  |  |  |  |  |  |  |  |  |    | 124 |
| Sebastião et al. * | 2016 |                               |                   |                |                 |                   |              |        |        |                 |     |                          |                            |                                            |                                       |                 |              |               |                          |                          |                 |                            |                       |  |  |  |  |  |  |  |  |  |  |    |     |

+ One covariate adjusted for      ++ Two or more covariates adjusted for

\*Studies reported only crude estimates.

## Appendix 7. QUIPS risk of bias

| Author             | Year | Study Participation | Study Attrition | Prognostic Factor Measurement | Outcome Measurement | Study Confounding | Statistical Analysis and Reporting | Overall rating |
|--------------------|------|---------------------|-----------------|-------------------------------|---------------------|-------------------|------------------------------------|----------------|
| Stafford           | 1990 | low                 | low             | low                           | low                 | high              | moderate                           | high           |
| Haas et al. A      | 1993 | low                 | low             | low                           | low                 | high              | moderate                           | high           |
| Haas et al. B      | 1993 | low                 | low             | low                           | low                 | high              | moderate                           | high           |
| Braveman et al.    | 1995 | low                 | low             | low                           | low                 | moderate          | low                                | moderate       |
| Burns et al.       | 1995 | low                 | low             | low                           | low                 | moderate          | low                                | moderate       |
| Onion et al. A     | 1999 | low                 | low             | low                           | low                 | high              | low                                | high           |
| Onion et al. B     | 1999 | low                 | low             | low                           | low                 | high              | low                                | high           |
| Onion et al. C     | 1999 | low                 | low             | low                           | low                 | high              | low                                | high           |
| Aron et al.        | 2000 | low                 | low             | low                           | low                 | low               | low                                | low            |
| Grant A            | 2005 | moderate            | high            | low                           | low                 | high              | low                                | high           |
| Grant B            | 2005 | low                 | low             | low                           | low                 | high              | low                                | high           |
| Coonrod et al.     | 2008 | low                 | low             | low                           | low                 | high              | low                                | high           |
| Huesch             | 2011 | low                 | low             | low                           | low                 | low               | low                                | low            |
| Kozhimannil et al. | 2013 | low                 | low             | low                           | low                 | low               | low                                | low            |
| Huesch et al.      | 2014 | low                 | low             | low                           | low                 | low               | low                                | low            |
| Sebastião et al.   | 2016 | low                 | low             | low                           | low                 | high              | low                                | high           |

## Research Checklist

1  
2 *According to MOOSE statement for meta-analyses of observational studies*

| Reporting of background should include                                                                     | Where to find in manuscript                   |
|------------------------------------------------------------------------------------------------------------|-----------------------------------------------|
| Problem definition                                                                                         | Manuscript (page 5, 6)                        |
| Hypothesis statement                                                                                       | Manuscript (page 5, 6)                        |
| Description of study outcome(s)                                                                            | Manuscript (page 6)                           |
| Type of exposure or intervention used                                                                      | Manuscript (page 6)                           |
| Type of study designs used                                                                                 | Manuscript (page 6, 7)                        |
| Study population                                                                                           | Manuscript (page 6, 7) Table 1,<br>Appendix 1 |
| <b>Reporting of search strategy should include</b>                                                         |                                               |
| Qualifications of searchers (eg, librarians and investigators)                                             | Manuscript (page 1)                           |
| Search strategy, including time period included in the synthesis and keywords                              | Manuscript (page 6), Appendix 1               |
| Effort to include all available studies, including contact with authors                                    | Manuscript (page 6)                           |
| Databases and registries searched                                                                          | Manuscript (page 6)                           |
| Search software used, name and version, including special features used (eg, explosion)                    | Manuscript (page 6)                           |
| Use of hand searching (eg, reference lists of obtained articles)                                           | Manuscript (page 6)                           |
| List of citations located and those excluded, including justification                                      | Figure 1                                      |
| Method of addressing articles published in languages other than English                                    | n/a                                           |
| Method of handling abstracts and unpublished studies                                                       | Manuscript (page 6, 7)                        |
| Description of any contact with authors                                                                    | No contact made                               |
| <b>Reporting of methods should include</b>                                                                 |                                               |
| Description of relevance or appropriateness of studies assembled for assessing the hypothesis to be tested | Manuscript (page 6, 7)                        |

|                                                                |                                                                                                                                                                                                                                                                              |                                            |
|----------------------------------------------------------------|------------------------------------------------------------------------------------------------------------------------------------------------------------------------------------------------------------------------------------------------------------------------------|--------------------------------------------|
| 1<br>2<br>3                                                    | Rationale for the selection and coding of data (eg, sound clinical principles or convenience)                                                                                                                                                                                | Manuscript (page 6, 7)                     |
| 4<br>5<br>6<br>7                                               | Documentation of how data were classified and coded (eg, multiple raters, blinding, and interrater reliability)                                                                                                                                                              | Manuscript (pages 6, 7)                    |
| 8<br>9<br>10<br>11<br>12                                       | Assessment of confounding (eg, comparability of cases and controls in studies where appropriate)                                                                                                                                                                             | Manuscript (page 6-7), Appendix 2, 3, 4    |
| 13<br>14<br>15<br>16<br>17                                     | Assessment of study quality, including blinding of quality assessors; stratification or regression on possible predictors of study results                                                                                                                                   | Manuscript (page 7), Figure 2, Appendix 5, |
| 18<br>19                                                       | Assessment of heterogeneity                                                                                                                                                                                                                                                  | Manuscript (page 7)                        |
| 20<br>21<br>22<br>23<br>24<br>25<br>26<br>27<br>28<br>29<br>30 | Description of statistical methods (eg, complete description of fixed or random effects models, justification of whether the chosen models account for predictors of study results, dose-response models, or cumulative meta-analysis) in sufficient detail to be replicated | Manuscript (page 7)                        |
| 31<br>32<br>33<br>34<br>35<br>36                               | Provision of appropriate tables and graphics                                                                                                                                                                                                                                 | Table 1, Figure 1-3 and Appendixes 1-7     |
| 37                                                             | <b>Reporting of results should include</b>                                                                                                                                                                                                                                   |                                            |
| 38<br>39<br>40<br>41<br>42                                     | Graphic summarizing individual study estimates and overall estimate                                                                                                                                                                                                          | Figure 2, Appendix 6                       |
| 43<br>44<br>45                                                 | Table giving descriptive information for each study included                                                                                                                                                                                                                 | Table 1                                    |
| 46<br>47                                                       | Results of sensitivity testing (eg, subgroup analysis)                                                                                                                                                                                                                       | Figure 3                                   |
| 48<br>49<br>50                                                 | Indication of statistical uncertainty of findings                                                                                                                                                                                                                            | Manuscript, Figure 2-4                     |
| 51                                                             | <b>Reporting of discussion should include</b>                                                                                                                                                                                                                                |                                            |
| 52<br>53<br>54                                                 | Quantitative assessment of bias (eg, publication bias)                                                                                                                                                                                                                       | Manuscript (page 8)                        |
| 55<br>56<br>57<br>58<br>59                                     | Justification for exclusion (eg, exclusion of non—English-language citations)                                                                                                                                                                                                | Manuscript (page 8)                        |
| 60                                                             | Assessment of quality of included studies                                                                                                                                                                                                                                    | Manuscript (page 8)                        |

**Reporting of conclusions should include**

- 1
- 2 Consideration of alternative explanations for observed results Manuscript (pages 9-13)
- 3
- 4 Generalization of the conclusions (ie, appropriate for the data Manuscript (page 13)
- 5
- 6 presented and within the domain of the literature review)
- 7
- 8
- 9 Guidelines for future research Manuscript (page 13)
- 10
- 11 Disclosure of funding source Manuscript (page 13)
- 12
- 13
- 14
- 15
- 16
- 17
- 18
- 19
- 20
- 21
- 22
- 23
- 24
- 25
- 26
- 27
- 28
- 29
- 30
- 31
- 32
- 33
- 34
- 35
- 36
- 37
- 38
- 39
- 40
- 41
- 42
- 43
- 44
- 45
- 46
- 47
- 48
- 49
- 50
- 51
- 52
- 53
- 54
- 55
- 56
- 57
- 58
- 59
- 60

For peer review only
