# Supplementary material for: Caesarean section in uninsured women in the USA: systematic review and meta-analysis
Source: PubMed Central journal article supplement — BMJ Open. 2019 Mar 3;9(3):e025356. doi: 10.1136/bmjopen-2018-025356 (PMC6443081; doi:10.1136/bmjopen-2018-025356), 2019-03-03
Supplement: bmjopen-2018-025356supp002.pdf [file bmjopen-2018-025356supp002.pdf]

## Appendix 2. List of the extracted variables

| <b>General information</b>                        |                               |                                          |
|---------------------------------------------------|-------------------------------|------------------------------------------|
|                                                   |                               | Author                                   |
|                                                   |                               | Year                                     |
|                                                   |                               | State                                    |
|                                                   |                               | Study design                             |
|                                                   |                               | Number of cases                          |
|                                                   |                               | Number of hospital units                 |
|                                                   |                               | Year of data collection                  |
|                                                   |                               | Population                               |
|                                                   |                               | Sampling                                 |
|                                                   |                               | Type of CS analyzed                      |
|                                                   |                               |                                          |
| <b>Type of data used</b>                          |                               |                                          |
|                                                   |                               | Type of data used                        |
|                                                   |                               |                                          |
| <b>Reported exclusion criteria</b>                |                               |                                          |
|                                                   |                               | Source population                        |
|                                                   | Maternal characteristics      | Age $\leq 14$                            |
|                                                   |                               | Racial or ethnic minorities              |
|                                                   |                               | Multipara                                |
|                                                   |                               | Previous caesarean section               |
|                                                   |                               | Other risk factors for caesarean section |
|                                                   | Fetus characteristics         | Stillbirth                               |
|                                                   |                               | Multiple delivery (twin or more)         |
|                                                   |                               | Newborn weighting <500 gr                |
|                                                   |                               | Breach presentation                      |
|                                                   |                               | Other malpresentation                    |
|                                                   |                               | Preterm delivery (less than 37 weeks)    |
|                                                   |                               | Other risk factors for caesarean section |
|                                                   |                               | Not in labor                             |
|                                                   |                               | Cases with missing data                  |
|                                                   |                               | Provider characteristics                 |
|                                                   |                               | Other factors                            |
|                                                   |                               |                                          |
| <b>Covariates used for statistical adjustment</b> |                               |                                          |
|                                                   | Maternal preconception status | Ethnicity/Race                           |
|                                                   |                               | Educational level                        |
|                                                   |                               | Marital status                           |
|                                                   |                               | Economic status                          |
|                                                   |                               | Insurances status                        |
|                                                   |                               | Urban status                             |

|                                                                             |                                    |                                            |
|-----------------------------------------------------------------------------|------------------------------------|--------------------------------------------|
|                                                                             |                                    | Weight                                     |
|                                                                             |                                    | Height                                     |
|                                                                             |                                    | Body mass index                            |
|                                                                             |                                    | Age                                        |
|                                                                             | Maternal clinical status           | Parity                                     |
|                                                                             |                                    | Previous caesarean section                 |
|                                                                             |                                    | Pre-existing (before pregnancy) conditions |
|                                                                             |                                    | Conditions developed during pregnancy      |
|                                                                             | Fetus characteristics              | Gestational age                            |
|                                                                             |                                    | Birth weight                               |
|                                                                             |                                    | Other characteristics                      |
|                                                                             | Prenatal care                      |                                            |
|                                                                             | Delivery characteristics           |                                            |
|                                                                             | Provider characteristics           |                                            |
|                                                                             | Other variables                    |                                            |
|                                                                             | Total number of covariates         |                                            |
|                                                                             |                                    |                                            |
| <b>QUIPS risk of bias</b>                                                   |                                    |                                            |
|                                                                             | Study Participation                |                                            |
|                                                                             | Study Attrition                    |                                            |
|                                                                             | Prognostic Factor Measurement      |                                            |
|                                                                             | Outcome Measurement                |                                            |
|                                                                             | Study Confounding                  |                                            |
|                                                                             | Statistical Analysis and Reporting |                                            |
|                                                                             | Overall rating                     |                                            |
|                                                                             |                                    |                                            |
| <b>Caesarean section rates among groups with different insurance status</b> |                                    |                                            |
|                                                                             | State                              |                                            |
|                                                                             | Year of data collection            |                                            |
|                                                                             | CS rate of privately insured (%)   |                                            |
|                                                                             | CS rate of publicly insured (%)    |                                            |
|                                                                             | CS rate of uninsured (%)           |                                            |
|                                                                             |                                    |                                            |
| <b>Effect estimate</b>                                                      |                                    |                                            |
|                                                                             | Determinant being compared         |                                            |
|                                                                             | Comparator (reference)             |                                            |
|                                                                             | Unadjusted outcome measure         |                                            |
|                                                                             | Effect size                        |                                            |
|                                                                             | Lower CI95%                        |                                            |
|                                                                             | Upper CI95%                        |                                            |
|                                                                             | SE                                 |                                            |
|                                                                             | Determinant being compared         |                                            |
|                                                                             | Comparator (reference)             |                                            |

|                                  |                           |
|----------------------------------|---------------------------|
|                                  | Adjusted outcome measure  |
|                                  | Effect size               |
|                                  | Lower CI95%               |
|                                  | Upper CI95%               |
|                                  | SE                        |
|                                  |                           |
| <b>Number of cases by groups</b> |                           |
|                                  | Total births (all groups) |
|                                  | Total No-CS (all groups)  |
|                                  | Total CS (all groups)     |
|                                  | Total births in group 1   |
|                                  | No-CS in group 1          |
|                                  | CS in group 1             |
|                                  | Total births in group 2   |
|                                  | No-CS in group 2          |
|                                  | CS in group 2             |
|                                  | Total births in group 3   |
|                                  | No-CS in group 3          |
|                                  | CS in group 3             |
