# Supplementary material for: Caesarean section in uninsured women in the USA: systematic review and meta-analysis
Source: PubMed Central journal article supplement — BMJ Open. 2019 Mar 3;9(3):e025356. doi: 10.1136/bmjopen-2018-025356 (PMC6443081; doi:10.1136/bmjopen-2018-025356), 2019-03-03
Supplement: bmjopen-2018-025356supp003.pdf [file bmjopen-2018-025356supp003.pdf]

### Appendix 3. List of excluded articles

| <b>Author, Year</b>               | <b>Reason for exclusion</b>                |
|-----------------------------------|--------------------------------------------|
| 1 Adhikari Dahal, et al., 2017    | Didn't report on insurance status of women |
| 2 Armstrong, et al., 2016         | Didn't report on insurance status of women |
| 3 Bailit, et al., 2006            | Didn't report on insurance status of women |
| 4 Bannister-Tyrrell, et al., 2015 | Didn't report on insurance status of women |
| 5 Blais, 1993                     | Didn't report on insurance status of women |
| 6 Brown, 2007                     | Didn't report on insurance status of women |
| 7 Brown, et al., 2013             | Other non-relevant studies                 |
| 8 Butcher, et al., 1997           | Didn't report on insurance status of women |
| 9 Caceres, et al., 2013           | Didn't report on insurance status of women |
| 10 Carayol, et al., 2007          | Didn't report on insurance status of women |
| 11 Carayol, et al., 2007          | Didn't report on insurance status of women |
| 12 Carayol, et al., 2008          | Didn't report on insurance status of women |
| 13 Carlisle, et al., 1996         | Didn't report on insurance status of women |
| 14 Chauhan, et al., 2008          | Other non-relevant studies                 |
| 15 Chen, et al., 2003             | Other non-relevant studies                 |
| 16 Chen, et al., 2014             | Didn't report on insurance status of women |
| 17 Chen, et al., 2016             | Didn't report on insurance status of women |
| 18 Cheng, et al., 2015            | Other non-relevant studies                 |
| 19 Cisse, et al., 1998            | Other non-relevant studies                 |
| 20 Clark, et al., 2007            | Didn't report on insurance status of women |
| 21 Clark, et al., 2014            | Didn't report on insurance status of women |
| 22 Clarke, et al., 1995           | Didn't report on insurance status of women |
| 23 Clarke, et al., 1996           | Didn't report on insurance status of women |
| 24 Clayton, et al., 2013          | Didn't report on insurance status of women |
| 25 Coonrod, et al., 2008          | Didn't report on insurance status of women |
| 26 Coulm, et al., 2012            | Didn't report on insurance status of women |
| 27 Cressie, 1993                  | Other non-relevant studies                 |
| 28 Da Silva Campi, et al., 2014   | Didn't report on insurance status of women |
| 29 da Silva, et al., 2003         | Other non-relevant studies                 |
| 30 Danishevski, et al., 2008      | Other non-relevant studies                 |
| 31 Daw, et al., 2018              | Didn't report on insurance status of women |
| 32 de Regt, et al., 1986          | Didn't report on insurance status of women |
| 33 Di Mario, et al., 2013         | Didn't report on insurance status of women |
| 34 Dimitrov, 1998                 | Other non-relevant studies                 |
| 35 Eckerlund, et al., 1998        | Didn't report on insurance status of women |
| 36 Edmonds, et al., 2015          | Other non-relevant studies                 |
| 37 Edmonds, et al., 2017          | Didn't report on insurance status of women |
| 38 Emmett, et al., 2010           | Other non-relevant studies                 |
| 39 Epstein, et al., 2009          | Didn't report on insurance status of women |
| 40 Franca, et al., 2016           | Didn't report on insurance status of women |

|                                 |                                            |
|---------------------------------|--------------------------------------------|
| 41 Gama, et al., 2009           | Other non-relevant studies                 |
| 42 Garcia, et al., 2001         | Didn't report on insurance status of women |
| 43 Gates, 1995                  | Didn't report on insurance status of women |
| 44 Gittelsohn, et al., 1995     | Didn't report on insurance status of women |
| 45 Gomes, et al., 1999          | Didn't report on insurance status of women |
| 46 Gonzalez-Perez, et al., 2001 | Didn't report on insurance status of women |
| 47 Goyert, et al., 1989         | Didn't report on insurance status of women |
| 48 Gregory, et al., 2001        | Didn't report on insurance status of women |
| 49 Gross, et al., 2015          | Didn't report on insurance status of women |
| 50 Grytten, et al., 2011        | Didn't report on insurance status of women |
| 51 Grytten, et al., 2012        | Didn't report on insurance status of women |
| 52 Gumedde, et al., 2017        | Didn't report on insurance status of women |
| 53 Hanley, et al., 2010         | Didn't report on insurance status of women |
| 54 Haraldsdottir, et al., 2015  | Didn't report on insurance status of women |
| 55 Haupt, 1982                  | Other non-relevant studies                 |
| 56 Heffner, et al., 2003        | Didn't report on insurance status of women |
| 57 Helfand, et al., 1997        | Didn't report on insurance status of women |
| 58 Henke, et al., 2014          | Didn't report on insurance status of women |
| 59 Hofmeyr, et al., 2015        | Other non-relevant studies                 |
| 60 Hopkins, et al., 2014        | Didn't report on insurance status of women |
| 61 Hsu, et al., 2008            | Didn't report on insurance status of women |
| 62 Hueston, et al., 2001        | Didn't report on insurance status of women |
| 63 Jessee, et al., 1982         | Didn't report on insurance status of women |
| 64 Johnson, et al., 1995        | Didn't report on insurance status of women |
| 65 Joyce, et al., 2002          | Didn't report on insurance status of women |
| 66 Kennare, 2003                | Other non-relevant studies                 |
| 67 Keskimaki, et al., 1994      | Didn't report on insurance status of women |
| 68 Khan, et al., 2017           | Didn't report on insurance status of women |
| 69 Kim, et al., 2012            | Didn't report on insurance status of women |
| 70 Kim, et al., 2016            | Didn't report on insurance status of women |
| 71 Kimsey, et al., 2017         | Didn't report on insurance status of women |
| 72 Klassen, 1975                | Didn't report on insurance status of women |
| 73 Klemetti, et al., 2010       | Didn't report on insurance status of women |
| 74 Koroukian, et al., 2001      | Didn't report on insurance status of women |
| 75 Korst, et al., 2005          | Didn't report on insurance status of women |
| 76 Kozhimannil, et al., 2014    | Didn't report on insurance status of women |
| 77 Krivenko, et al., 1994       | Other non-relevant studies                 |
| 78 Kyu-Tae, et al., 2017        | Didn't report on insurance status of women |
| 79 Lee, et al., 2007            | Didn't report on insurance status of women |
| 80 Lee, et al., 2014            | Didn't report on insurance status of women |
| 81 Leung, et al., 2001          | Didn't report on insurance status of women |
| 82 Li, et al., 2017             | Didn't report on insurance status of women |
| 83 Librero, et al., 2000        | Didn't report on insurance status of women |

|                                   |                                            |
|-----------------------------------|--------------------------------------------|
| 84 Lidegaard, et al., 1994        | Didn't report on insurance status of women |
| 85 Little, et al., 2015           | Didn't report on insurance status of women |
| 86 Liu, et al., 2007              | Didn't report on insurance status of women |
| 87 Localio, et al., 1993          | Didn't report on insurance status of women |
| 88 Lundsberg, et al., 2017        | Didn't report on insurance status of women |
| 89 Lutomski, et al.,              | Didn't report on insurance status of women |
| 90 Lutomski, et al., 2014         | Didn't report on insurance status of women |
| 91 Maeda, et al., 2018            | Didn't report on insurance status of women |
| 92 Marquez-Calderon, et al., 2011 | Didn't report on insurance status of women |
| 93 McKenzie, et al., 1993         | Didn't report on insurance status of women |
| 94 Menard, 1999                   | Didn't report on insurance status of women |
| 95 Mendlovic, et al., 2017        | Didn't report on insurance status of women |
| 96 Mesterton, et al., 2017        | Didn't report on insurance status of women |
| 97 Mikolajczyk, et al., 2013      | Didn't report on insurance status of women |
| 98 Mindell, et al., 1982          | Didn't report on insurance status of women |
| 99 Misra, 2008                    | Didn't report on insurance status of women |
| 100 Mitler, et al., 2000          | Didn't report on insurance status of women |
| 101 Mossialos, et al., 2005       | Didn't report on insurance status of women |
| 102 Movsas, et al., 2012          | Didn't report on insurance status of women |
| 103 Murray, 2000                  | Didn't report on insurance status of women |
| 104 Murray, et al., 1997          | Didn't report on insurance status of women |
| 105 Naiditch, et al., 1997        | Didn't report on insurance status of women |
| 106 Newton, et al., 1989          | Didn't report on insurance status of women |
| 107 Nicholson, et al., 2009       | Didn't report on insurance status of women |
| 108 Nigam, 2011                   | Didn't report on insurance status of women |
| 109 Nilsen, et al., 2014          | Didn't report on insurance status of women |
| 110 Nirupam, et al., 1995         | Other non-relevant studies                 |
| 111 Oleske, et al., 1991          | Didn't report on insurance status of women |
| 112 Ono, et al., 2016             | Didn't report on insurance status of women |
| 113 Paranjothy, et al., 2005      | Didn't report on insurance status of women |
| 114 Parazzini, et al., 2015       | Didn't report on insurance status of women |
| 115 Pel, et al., 1995             | Other non-relevant studies                 |
| 116 Phipps, et al., 2014          | Other non-relevant studies                 |
| 117 Placek, et al., 1980          | Didn't report on insurance status of women |
| 118 Rabilloud, et al., 1998       | Didn't report on insurance status of women |
| 119 Raifman, et al., 2014         | Didn't report on insurance status of women |
| 120 Rattner, 1996                 | Didn't report on insurance status of women |
| 121 Ravindran, 2003               | Other non-relevant studies                 |
| 122 Ravindran, 2008               | Didn't report on insurance status of women |
| 123 Renzi, et al., 2012           | Didn't report on insurance status of women |
| 124 Ribeiro, et al., 2007         | Didn't report on insurance status of women |
| 125 Riddell, et al., 2017         | Didn't report on insurance status of women |
| 126 Rohrer, 1993                  | Other non-relevant studies                 |

|     |                                |                                            |
|-----|--------------------------------|--------------------------------------------|
| 127 | Roohan, et al., 2001           | Didn't report on insurance status of women |
| 128 | Rossignol, et al., 2013        | Didn't report on insurance status of women |
| 129 | Rowe, et al., 2014             | Didn't report on insurance status of women |
| 130 | Sandall, et al., 2013          | Other non-relevant studies                 |
| 131 | Sarria Santamera, et al., 1994 | Didn't report on insurance status of women |
| 132 | Schemann, et al., 2015         | Didn't report on insurance status of women |
| 133 | Schemann, et al., 2016         | Didn't report on insurance status of women |
| 134 | Sentell, et al., 2016          | Didn't report on insurance status of women |
| 135 | Shiono, et al., 1987           | Didn't report on insurance status of women |
| 136 | Shorten, et al., 2007          | Didn't report on insurance status of women |
| 137 | Signorelli, et al., 1991       | Didn't report on insurance status of women |
| 138 | Singata, et al., 2013          | Other non-relevant studies                 |
| 139 | Snyder, et al., 2011           | Didn't report on insurance status of women |
| 140 | Souza, et al., 2016            | Didn't report on insurance status of women |
| 141 | Sufang, et al., 2007           | Didn't report on insurance status of women |
| 142 | Tang, et al., 2006             | Didn't report on insurance status of women |
| 143 | Tang, et al., 2006             | Didn't report on insurance status of women |
| 144 | Tracy, et al., 2006            | Didn't report on insurance status of women |
| 145 | Tucker, et al.,                | Didn't report on insurance status of women |
| 146 | Tussing, et al., 1994          | Didn't report on insurance status of women |
| 147 | Vadnais, et al., 2017          | Didn't report on insurance status of women |
| 148 | Vankan, et al., 2017           | Didn't report on insurance status of women |
| 149 | Vayda, et al., 1984            | Didn't report on insurance status of women |
| 150 | Vecino-Ortiz, et al.,          | Didn't report on insurance status of women |
| 151 | Wang, et al., 2017             | Didn't report on insurance status of women |
| 152 | Ward, et al., 2010             | Other non-relevant studies                 |
| 153 | Weber, 1990                    | Other non-relevant studies                 |
| 154 | Wei, et al., 2013              | Other non-relevant studies                 |
| 155 | Woolbright, 1996               | Didn't report on insurance status of women |
| 156 | Xing Lin, et al., 2012         | Didn't report on insurance status of women |
| 157 | Xirasagar, et al., 2004        | Didn't report on insurance status of women |
| 158 | Xirasagar, et al., 2006        | Didn't report on insurance status of women |
| 159 | Xirasagar, et al., 2007        | Didn't report on insurance status of women |
| 160 | Yang, et al., 2014             | Didn't report on insurance status of women |
| 161 | Yi-Chen, et al., 2012          | Didn't report on insurance status of women |
| 162 | Zdeb, et al., 1980             | Didn't report on insurance status of women |
| 163 | Zere, et al., 2010             | Didn't report on insurance status of women |
| 164 | Zhang, et al., 2013            | Didn't report on insurance status of women |
| 165 | Zwecker, et al., 2011          | Didn't report on insurance status of women |
