# Supplementary material for: Caesarean section in uninsured women in the USA: systematic review and meta-analysis
Source: PubMed Central journal article supplement — BMJ Open. 2019 Mar 3;9(3):e025356. doi: 10.1136/bmjopen-2018-025356 (PMC6443081; doi:10.1136/bmjopen-2018-025356), 2019-03-03
Supplement: bmjopen-2018-025356supp004.pdf [file bmjopen-2018-025356supp004.pdf]

#### Appendix 4. Type of data used

| Author             | Year | Survey | Hospital records | Birth certificates/registry | Census data |
|--------------------|------|--------|------------------|-----------------------------|-------------|
| Stafford           | 1990 |        | +                |                             |             |
| Haas et al. A      | 1993 |        | +                | +                           |             |
| Haas et al. B      | 1993 |        | +                | +                           |             |
| Braveman et al.    | 1995 |        |                  | +                           | +           |
| Burns et al.       | 1995 |        | +                | +                           |             |
| Onion et al. A     | 1999 |        | +                |                             |             |
| Onion et al. B     | 1999 |        | +                |                             |             |
| Onion et al. C     | 1999 |        | +                |                             |             |
| Aron et al.        | 2000 |        | +                |                             |             |
| Grant A            | 2005 | +      |                  |                             |             |
| Grant B            | 2005 |        | +                |                             |             |
| Coonrod et al.     | 2008 |        |                  | +                           |             |
| Huesch             | 2011 |        | +                |                             |             |
| Kozhimannil et al. | 2013 |        | +                |                             |             |
| Huesch et al.      | 2014 |        | +                |                             |             |
| Sebastião et al.   | 2016 |        | +                | +                           |             |
