# Supplementary material for: Caesarean section in uninsured women in the USA: systematic review and meta-analysis
Source: PubMed Central journal article supplement — BMJ Open. 2019 Mar 3;9(3):e025356. doi: 10.1136/bmjopen-2018-025356 (PMC6443081; doi:10.1136/bmjopen-2018-025356), 2019-03-03
Supplement: bmjopen-2018-025356supp005.pdf [file bmjopen-2018-025356supp005.pdf]

**Appendix 5. Reported exclusion criteria**

| Authors            | Year | Source population                                | Maternal characteristics |                             |           |                            |                                          | Fetus characteristics |                                  |                           |                     |                       |                                       | Not in labor | Cases with missing data | Provider characteristics | Other factors |                                          |   |
|--------------------|------|--------------------------------------------------|--------------------------|-----------------------------|-----------|----------------------------|------------------------------------------|-----------------------|----------------------------------|---------------------------|---------------------|-----------------------|---------------------------------------|--------------|-------------------------|--------------------------|---------------|------------------------------------------|---|
|                    |      |                                                  | Age ≤14                  | Racial or ethnic minorities | Multipara | Previous caesarean section | Other risk factors for caesarean section | Stillbirth            | Multiple delivery (twin or more) | Newborn weighting <500 gr | Breach presentation | Other malpresentation | Preterm delivery (less than 37 weeks) |              |                         |                          |               | Other risk factors for caesarean section |   |
| Stafford           | 1990 | All deliveries in California, United States      |                          |                             |           |                            |                                          |                       |                                  |                           |                     |                       |                                       |              |                         |                          |               |                                          |   |
| Haas et al. A      | 1993 | All deliveries in Massachusetts, United States   |                          |                             |           |                            |                                          | +                     | +                                | +                         |                     |                       |                                       |              |                         |                          | +             |                                          |   |
| Haas et al. B      | 1993 | All deliveries in Massachusetts, United States   |                          |                             |           |                            |                                          | +                     | +                                | +                         |                     |                       |                                       |              |                         |                          | +             |                                          |   |
| Braveman et al.    | 1995 | All deliveries in California, United States      |                          |                             | +         | +                          |                                          | +                     | +                                |                           |                     |                       | +                                     |              |                         |                          | +             |                                          |   |
| Burns et al.       | 1995 | All deliveries in Arizona, United States         |                          |                             |           |                            |                                          |                       |                                  |                           |                     |                       |                                       |              |                         |                          | +             | +                                        |   |
| Onion et al. A     | 1999 | All deliveries in Maine, United States           |                          |                             | +         | +                          |                                          |                       | +                                |                           |                     |                       |                                       |              |                         |                          |               | +                                        |   |
| Onion et al. B     | 1999 | All deliveries in New Hampshire, United States   |                          |                             | +         | +                          |                                          |                       | +                                |                           |                     |                       |                                       |              |                         |                          |               | +                                        |   |
| Onion et al. C     | 1999 | All deliveries in Vermont, United States         |                          |                             | +         | +                          |                                          |                       | +                                |                           |                     |                       |                                       |              |                         |                          |               | +                                        |   |
| Aron et al.        | 2000 | All deliveries in Cleveland, Ohio, United States |                          |                             |           | +                          |                                          |                       |                                  | +                         | *                   |                       |                                       |              |                         |                          | +             | +                                        | + |
| Grant A            | 2005 | All deliveries, United States                    |                          |                             |           |                            |                                          |                       |                                  |                           |                     |                       |                                       |              |                         |                          | +             |                                          |   |
| Grant B            | 2005 | All deliveries in Florida, United States         |                          |                             |           |                            |                                          |                       |                                  |                           |                     |                       |                                       |              |                         |                          | +             | +                                        | + |
| Coonrod et al.     | 2008 | All deliveries in Arizona, United States         |                          | +                           | +         |                            |                                          | +                     | +                                |                           |                     | +                     | +                                     | +            |                         |                          |               | +                                        |   |
| Huesch             | 2011 | All deliveries in New Jersey, United States      |                          |                             |           | +                          | +                                        |                       | +                                |                           |                     | +                     | +                                     | +            | +                       |                          |               | +                                        |   |
| Kozhimannil et al. | 2013 | All deliveries in 44 states, United States       |                          |                             |           |                            |                                          |                       |                                  |                           |                     |                       |                                       |              |                         |                          |               | +                                        |   |
| Huesch et al.      | 2014 | All deliveries in California, United States      | +                        |                             |           | +                          |                                          |                       |                                  |                           |                     |                       |                                       |              |                         |                          | +             |                                          |   |
| Sebastião et al.   | 2016 | All deliveries in Florida, United States         |                          |                             | +         | +                          |                                          | +                     | +                                |                           |                     | +                     | +                                     | +            | +                       | +                        | +             | +                                        | + |

\*500 or less grams
