# Supplementary material for: Caesarean section in uninsured women in the USA: systematic review and meta-analysis
Source: PubMed Central journal article supplement — BMJ Open. 2019 Mar 3;9(3):e025356. doi: 10.1136/bmjopen-2018-025356 (PMC6443081; doi:10.1136/bmjopen-2018-025356), 2019-03-03
Supplement: bmjopen-2018-025356supp006.pdf [file bmjopen-2018-025356supp006.pdf]

**Appendix 6. Covariates used for statistical adjustment**

| Author             | Year | Maternal preconception status |                   |                |                 |                   |              |        |        |                 |     | Maternal clinical status |                            |                                            | Fetus characteristics                 |                 |              | Prenatal care | Delivery characteristics | Provider characteristics | Other variables | Total number of covariates |                       |    |    |    |    |     |
|--------------------|------|-------------------------------|-------------------|----------------|-----------------|-------------------|--------------|--------|--------|-----------------|-----|--------------------------|----------------------------|--------------------------------------------|---------------------------------------|-----------------|--------------|---------------|--------------------------|--------------------------|-----------------|----------------------------|-----------------------|----|----|----|----|-----|
|                    |      | Ethnicity/Race                | Educational level | Marital status | Economic status | Insurances status | Urban status | Weight | Height | Body mass index | Age | Parity                   | Previous caesarean section | Pre-existing (before pregnancy) conditions | Conditions developed during pregnancy | Gestational age | Birth weight |               |                          |                          |                 |                            | Other characteristics |    |    |    |    |     |
| Stafford*          | 1990 |                               |                   |                |                 |                   |              |        |        |                 |     |                          |                            |                                            |                                       |                 |              |               |                          |                          |                 |                            |                       |    |    |    | 0  |     |
| Haas et al. A*     | 1993 |                               |                   |                |                 |                   |              |        |        |                 |     |                          |                            |                                            |                                       |                 |              |               |                          |                          |                 |                            |                       |    |    |    |    | 0   |
| Haas et al. B*     | 1993 |                               |                   |                |                 |                   |              |        |        |                 |     |                          |                            |                                            |                                       |                 |              |               |                          |                          |                 |                            |                       |    |    |    |    | 0   |
| Braveman et al.    | 1995 | +                             | +                 | +              | +               | +                 |              |        |        |                 | +   |                          |                            |                                            | +                                     |                 | +            | +             | +                        | +                        | ++              | +                          |                       |    |    |    | 15 |     |
| Burns et al.       | 1995 | +                             | +                 |                |                 |                   |              |        |        |                 | +   | +                        | +                          |                                            |                                       | ++              | +            | +             | ++                       | +                        |                 |                            | ++                    | ++ |    |    |    | 33  |
| Onion et al. A     | 1999 |                               |                   |                |                 |                   |              |        |        |                 | +   |                          |                            |                                            |                                       |                 |              |               |                          |                          |                 |                            |                       |    |    |    |    | 1   |
| Onion et al. B     | 1999 |                               |                   |                |                 |                   |              |        |        |                 | +   |                          |                            |                                            |                                       |                 |              |               |                          |                          |                 |                            |                       |    |    |    |    | 1   |
| Onion et al. C     | 1999 |                               |                   |                |                 |                   |              |        |        |                 | +   |                          |                            |                                            |                                       |                 |              |               |                          |                          |                 |                            |                       |    |    |    |    | 1   |
| Aron et al.        | 2000 |                               |                   |                |                 |                   |              |        |        |                 | +   | +                        |                            | ++                                         | ++                                    | ++              | +            | ++            |                          |                          |                 |                            |                       |    |    |    |    | 39  |
| Grant A*           | 2005 |                               |                   |                |                 |                   |              |        |        |                 |     |                          |                            |                                            |                                       |                 |              |               |                          |                          |                 |                            |                       |    |    |    |    | 0   |
| Grant B*           | 2005 |                               |                   |                |                 |                   |              |        |        |                 |     |                          |                            |                                            |                                       |                 |              |               |                          |                          |                 |                            |                       |    |    |    |    | 0   |
| Coonrod et al.*    | 2008 |                               |                   |                |                 |                   |              |        |        |                 |     |                          |                            |                                            |                                       |                 |              |               |                          |                          |                 |                            |                       |    |    |    |    | 0   |
| Huesch             | 2011 | +                             |                   | +              |                 |                   |              | +      |        |                 | +   |                          |                            |                                            |                                       |                 |              |               |                          |                          |                 |                            |                       |    | +  | ++ |    | 8   |
| Kozhimannil et al. | 2013 | +                             |                   |                |                 |                   |              |        |        |                 | +   | +                        | +                          | ++                                         | ++                                    | +               |              | ++            |                          |                          |                 |                            | ++                    | ++ | ++ | ++ |    | 16  |
| Huesch et al.      | 2014 | +                             |                   |                | +               |                   |              |        |        |                 | +   |                          |                            | ++                                         | ++                                    | +               |              | ++            | +                        | ++                       | ++              | ++                         | ++                    | ++ | ++ | ++ |    | 124 |
| Sebastião et al. * | 2016 |                               |                   |                |                 |                   |              |        |        |                 |     |                          |                            |                                            |                                       |                 |              |               |                          |                          |                 |                            |                       |    |    |    |    |     |

+ One covariate adjusted for      ++ Two or more covariates adjusted for

\*Studies reported only crude estimates.
