# Supplementary material for: Caesarean section in uninsured women in the USA: systematic review and meta-analysis
Source: PubMed Central journal article supplement — BMJ Open. 2019 Mar 3;9(3):e025356. doi: 10.1136/bmjopen-2018-025356 (PMC6443081; doi:10.1136/bmjopen-2018-025356), 2019-03-03
Supplement: bmjopen-2018-025356supp007.pdf [file bmjopen-2018-025356supp007.pdf]

Appendix 7. QUIPS risk of bias

| Author             | Year | Study Participation | Study Attrition | Prognostic Factor Measurement | Outcome Measurement | Study Confounding | Statistical Analysis and Reporting | Overall rating |
|--------------------|------|---------------------|-----------------|-------------------------------|---------------------|-------------------|------------------------------------|----------------|
| Stafford           | 1990 | low                 | low             | low                           | low                 | high              | moderate                           | high           |
| Haas et al. A      | 1993 | low                 | low             | low                           | low                 | high              | moderate                           | high           |
| Haas et al. B      | 1993 | low                 | low             | low                           | low                 | high              | moderate                           | high           |
| Braveman et al.    | 1995 | low                 | low             | low                           | low                 | moderate          | low                                | moderate       |
| Burns et al.       | 1995 | low                 | low             | low                           | low                 | moderate          | low                                | moderate       |
| Onion et al. A     | 1999 | low                 | low             | low                           | low                 | high              | low                                | high           |
| Onion et al. B     | 1999 | low                 | low             | low                           | low                 | high              | low                                | high           |
| Onion et al. C     | 1999 | low                 | low             | low                           | low                 | high              | low                                | high           |
| Aron et al.        | 2000 | low                 | low             | low                           | low                 | low               | low                                | low            |
| Grant A            | 2005 | moderate            | high            | low                           | low                 | high              | low                                | high           |
| Grant B            | 2005 | low                 | low             | low                           | low                 | high              | low                                | high           |
| Coonrod et al.     | 2008 | low                 | low             | low                           | low                 | high              | low                                | high           |
| Huesch             | 2011 | low                 | low             | low                           | low                 | low               | low                                | low            |
| Kozhimannil et al. | 2013 | low                 | low             | low                           | low                 | low               | low                                | low            |
| Huesch et al.      | 2014 | low                 | low             | low                           | low                 | low               | low                                | low            |
| Sebastião et al.   | 2016 | low                 | low             | low                           | low                 | high              | low                                | high           |
